# Supplementary material for: Comparison of Bacterial Microbiota in Raw Mare’s Milk and Koumiss Using PacBio Single Molecule Real-Time Sequencing Technology
Source: Front Microbiol. 2020 Oct 27;11:581610. doi: 10.3389/fmicb.2020.581610 (PMC7652796; doi:10.3389/fmicb.2020.581610)
Supplement: Supplementary Table 1 — Microbial abundance of koumiss and raw mare’s milk microbiota at phylum, genus, and species levels. [file Table_1.XLSX]

## Sheet: Koumiss
phylum
taxonomy	C1	C2	C3	C4	C5	C6	Q1	Q11	Q12	Q15	Q16	Q19	Q20	Q22	Q24	Q27	Q6	Q9	Z12	Z13	Z14	Z15	Z17	Z2	Z3	Z5	Z6	Z7	Z9
Acidobacteria	0	0	0	0	0	0	0	0	0	0	1	0	0	0	0	0	0	0	0	0	0	0	0	0	0	0	0	0	0
Actinobacteria	0	0	0	0	0	1	0	7	0	0	10	51	0	14	0	1	31	1	0	8	13	43	0	1	2	0	0	0	1
BRC1	0	0	0	0	0	0	0	0	0	0	0	0	0	0	0	0	0	0	0	0	0	0	0	0	0	0	0	0	0
Bacteroidetes	1	0	0	0	0	1	0	0	0	0	3	26	0	3	0	1	0	3	0	0	2	21	0	0	0	0	0	0	0
Chloroflexi	0	0	0	0	0	0	0	0	0	0	0	0	0	0	0	0	0	0	0	0	0	0	0	0	0	0	0	0	0
Cyanobacteria	0	0	0	0	0	0	0	0	0	0	0	0	0	1	0	0	0	0	0	0	0	0	0	0	0	0	0	0	0
Deinococcus-Thermus	1	0	0	0	0	0	0	1	0	1	0	28	0	0	0	0	0	0	0	1	0	2	0	0	1	0	0	0	0
FBP	0	0	0	0	0	0	0	0	0	0	0	0	0	0	0	0	0	0	0	0	0	0	0	0	0	0	0	0	0
Firmicutes	7097	6835	5204	5149	8344	6427	7423	7205	9798	7661	4910	5996	9104	10780	7818	5231	7060	12004	6423	8269	7713	7183	5730	8587	6113	9618	4689	6211	6416
Fusobacteria	0	0	0	0	0	0	0	0	0	0	0	0	0	1	0	0	0	0	0	0	0	0	0	0	0	0	0	0	0
Gemmatimonadetes	0	0	0	0	0	0	0	1	0	0	0	0	0	0	0	0	0	0	0	0	0	0	0	0	0	0	0	0	0
OD1	0	0	0	0	0	0	0	0	0	0	0	0	0	0	0	0	0	0	0	0	0	0	0	0	0	0	0	0	0
Planctomycetes	0	0	0	0	0	0	0	0	0	0	0	0	0	0	0	0	0	0	0	0	0	0	0	0	0	0	0	0	0
Proteobacteria	60	367	9	142	4	45	154	82	150	753	2680	1956	159	214	3	272	37	90	0	402	25	361	55	94	167	4	46	0	102
Spirochaetes	0	0	0	0	0	0	0	0	0	0	0	0	0	0	0	0	0	0	0	0	0	0	0	0	0	0	0	0	0
TM7	0	0	0	0	0	0	0	0	0	0	0	0	0	0	0	0	0	1	0	0	0	1	0	0	1	0	0	0	0
Verrucomicrobia	0	0	0	0	0	0	0	0	0	0	0	0	0	0	0	0	0	0	0	0	1	0	0	0	0	0	0	0	0
Viridiplantae	0	0	0	0	0	0	0	0	0	0	1	1	0	0	0	0	0	0	0	0	0	0	0	0	0	0	0	0	0
unclassified	0	0	0	0	0	0	0	0	0	0	0	0	1	0	0	0	0	0	0	0	0	0	1	0	1	0	1	0	0
genus
taxonomy	C1	C2	C3	C4	C5	C6	Q1	Q11	Q12	Q15	Q16	Q19	Q20	Q22	Q24	Q27	Q6	Q9	Z12	Z13	Z14	Z15	Z17	Z2	Z3	Z5	Z6	Z7	Z9
Lactobacillus	7040	6664	5136	3078	8308	5199	7118	7158	9248	7656	4191	3850	8786	10768	7817	3014	7059	11999	6416	8144	2774	6131	5728	8585	6056	9617	4660	12	473
Lactococcus	45	128	65	2064	36	1214	83	36	273	0	661	1548	65	2	1	618	0	2	0	2	6	716	0	2	5	1	1	6196	4341
Streptococcus	8	34	1	5	0	9	217	5	210	0	7	379	234	3	0	1510	0	0	7	1	4927	254	0	0	1	0	27	0	1552
Acetobacter	54	322	5	57	2	16	1	25	43	59	982	0	7	196	2	199	33	88	0	369	4	45	54	88	121	3	46	0	41
Klebsiella	3	21	0	5	0	12	13	7	17	47	1097	551	6	0	1	15	0	0	0	5	0	227	0	1	2	0	0	0	1
Escherichia	0	1	0	0	0	0	26	7	0	559	431	5	6	0	0	21	0	0	0	3	0	0	0	1	0	0	0	0	1
Acinetobacter	2	0	1	29	0	5	23	12	5	3	1	711	1	2	0	0	0	1	0	3	5	23	0	2	19	0	0	0	2
Moraxella	0	2	1	0	0	2	2	22	3	0	3	503	0	0	0	13	2	1	0	3	3	17	0	2	3	0	0	0	0
Enterobacter	0	15	0	26	0	4	58	0	82	25	94	38	131	0	0	14	0	0	0	2	2	18	0	0	0	0	0	0	56
Macrococcus	0	1	0	1	0	0	0	0	60	3	6	18	10	0	0	0	0	0	0	91	0	15	0	0	0	0	1	0	1
Enterococcus	1	5	2	0	0	1	1	0	0	1	1	37	4	0	0	59	1	1	0	16	0	34	0	0	0	0	0	0	1
Staphylococcus	1	0	0	0	0	0	0	1	2	1	0	101	1	3	0	0	0	0	0	9	1	26	2	0	1	0	0	0	1
unclassified	1	1	0	2	0	3	8	0	3	19	17	24	6	1	0	16	0	3	0	0	0	1	1	0	3	0	1	0	24
Leuconostoc	1	1	0	0	0	1	1	0	2	0	36	5	0	1	0	14	0	1	0	1	0	1	0	0	0	0	0	3	23
Cutibacterium	0	0	0	0	0	0	0	3	0	0	2	4	0	8	0	1	0	0	0	0	10	26	0	0	0	0	0	0	1
Serratia	0	0	0	0	0	0	0	0	0	38	4	3	0	0	0	0	0	0	0	0	0	0	0	0	4	1	0	0	0
Bifidobacterium	0	0	0	0	0	0	0	4	0	0	5	0	0	0	0	0	31	0	0	0	1	3	0	1	1	0	0	0	0
Chryseobacterium	0	0	0	0	0	1	0	0	0	0	0	18	0	2	0	0	0	2	0	0	0	21	0	0	0	0	0	0	0
Clostridium	0	0	0	0	0	0	0	0	0	0	0	0	0	0	0	0	0	0	0	0	0	0	0	0	40	0	0	0	0
Citrobacter	0	0	0	3	0	1	1	0	0	0	32	1	1	0	0	0	0	0	0	0	0	0	0	0	0	0	0	0	0
Kocuria	0	0	0	0	0	0	0	0	0	0	0	32	0	0	0	0	0	0	0	4	0	0	0	0	0	0	0	0	0
Comamonas	0	0	1	0	0	0	0	0	0	0	0	32	0	0	0	0	0	0	0	0	0	0	0	0	0	0	0	0	0
Curvibacter	0	0	0	0	0	0	0	2	0	0	3	7	0	3	0	0	0	0	0	4	1	9	0	0	3	0	0	0	0
Kluyvera	0	0	0	18	0	4	2	0	0	0	0	0	2	0	0	1	0	0	0	0	0	1	0	0	0	0	0	0	0
Massilia	0	0	0	0	0	0	0	0	0	0	0	22	0	0	0	0	1	0	0	0	3	0	0	0	1	0	0	0	0
Aeromonas	0	1	0	0	0	0	22	0	0	0	0	2	0	0	0	0	0	0	0	0	0	1	0	0	0	0	0	0	0
Thermus	1	0	0	0	0	0	0	0	0	1	0	23	0	0	0	0	0	0	0	0	0	0	0	0	1	0	0	0	0
Anaerobacillus	0	0	0	0	0	0	0	4	0	0	3	3	0	0	0	0	0	0	0	2	5	4	0	0	2	0	0	0	0
Gemella	0	0	0	0	0	0	0	0	0	0	0	20	0	0	0	0	0	0	0	0	0	0	0	0	0	0	0	0	0
Pseudomonas	0	0	0	0	0	0	0	0	0	0	1	10	0	0	0	0	0	0	0	0	0	2	0	0	7	0	0	0	0
Komagataeibacter	0	1	0	0	0	0	0	1	0	0	0	0	0	7	0	0	1	0	0	9	0	0	0	0	0	0	0	0	0
Raoultella	0	0	1	0	0	0	0	0	0	1	5	3	4	0	0	0	0	0	0	1	0	0	0	0	0	0	0	0	0
Corynebacterium	0	0	0	0	0	0	0	0	0	0	1	1	0	2	0	0	0	0	0	1	2	7	0	0	0	0	0	0	0
Paenibacillus	0	0	0	0	0	0	0	0	0	0	0	12	0	2	0	0	0	0	0	0	0	0	0	0	0	0	0	0	0
Actinobacillus	0	0	0	0	0	0	0	0	0	0	3	10	0	0	0	0	0	0	0	0	0	0	0	0	0	0	0	0	0
Paracoccus	0	1	0	0	0	0	0	2	0	0	0	1	0	0	0	0	0	0	0	1	2	3	0	0	0	0	0	0	0
Bacillus	0	0	0	0	0	0	0	1	0	0	3	4	0	0	0	0	0	0	0	0	0	0	0	0	1	0	0	0	0
Deinococcus	0	0	0	0	0	0	0	1	0	0	0	5	0	0	0	0	0	0	0	1	0	2	0	0	0	0	0	0	0
Gluconobacter	0	0	0	0	1	0	0	0	0	0	0	0	0	0	0	7	0	0	0	0	0	0	1	0	0	0	0	0	0
Propionibacterium	0	0	0	0	0	0	0	0	0	0	0	3	0	3	0	0	0	0	0	0	0	3	0	0	0	0	0	0	0
Brevundimonas	0	0	0	0	0	0	0	1	0	0	0	2	0	0	0	0	0	0	0	0	2	2	0	0	1	0	0	0	0
Cupriavidus	0	0	0	0	0	0	0	0	0	0	0	7	0	0	0	1	0	0	0	0	0	0	0	0	0	0	0	0	0
Luteimonas	0	0	0	0	0	0	0	0	0	0	0	4	0	0	0	0	0	0	0	0	0	3	0	0	0	0	0	0	0
Lysobacter	0	0	0	0	0	0	0	2	0	0	0	1	0	2	0	0	0	0	0	0	1	0	0	0	0	0	0	0	1
Rothia	0	0	0	0	0	0	0	0	0	0	0	4	0	0	0	0	0	0	0	3	0	0	0	0	0	0	0	0	0
Stenotrophomonas	0	0	0	0	0	0	0	0	0	0	0	3	0	0	0	0	0	0	0	0	0	0	0	0	3	0	0	0	0
Delftia	0	0	0	0	0	0	0	0	0	0	0	3	0	0	0	0	0	0	0	0	0	2	0	0	0	0	0	0	0
Herbaspirillum	0	0	0	0	0	0	0	0	0	0	4	0	0	1	0	0	0	0	0	0	0	0	0	0	0	0	0	0	0
Pantoea	0	0	0	0	0	0	0	0	0	0	1	4	0	0	0	0	0	0	0	0	0	0	0	0	0	0	0	0	0
Shigella	0	0	0	0	0	0	1	0	0	1	2	0	0	0	0	1	0	0	0	0	0	0	0	0	0	0	0	0	0
Pseudoxanthomonas	0	0	0	0	1	0	0	0	0	0	0	2	0	0	0	0	0	0	0	0	0	1	0	0	0	0	0	0	0
Cloacibacterium	1	0	0	0	0	0	0	0	0	0	0	0	0	0	0	0	0	1	0	0	1	0	0	0	0	0	0	0	0
Duganella	1	2	0	0	0	0	0	0	0	0	0	0	0	0	0	0	0	0	0	0	0	0	0	0	0	0	0	0	0
Exiguobacterium	0	0	0	0	0	0	0	0	0	0	0	3	0	0	0	0	0	0	0	0	0	0	0	0	0	0	0	0	0
Finegoldia	0	0	0	0	0	0	0	0	0	0	0	0	0	0	0	0	0	0	0	3	0	0	0	0	0	0	0	0	0
Gluconacetobacter	0	0	0	3	0	0	0	0	0	0	0	0	0	0	0	0	0	0	0	0	0	0	0	0	0	0	0	0	0
Jeotgalicoccus	0	0	0	0	0	0	0	0	0	0	0	1	0	0	0	0	0	0	0	0	0	0	0	0	2	0	0	0	0
Kingella	0	0	0	0	0	0	0	0	0	0	0	3	0	0	0	0	0	0	0	0	0	0	0	0	0	0	0	0	0
Lysinibacillus	0	0	0	0	0	0	0	0	0	0	0	3	0	0	0	0	0	0	0	0	0	0	0	0	0	0	0	0	0
Neisseria	0	0	0	0	0	0	0	0	0	0	0	3	0	0	0	0	0	0	0	0	0	0	0	0	0	0	0	0	0
Aerococcus	0	0	0	0	0	0	0	0	0	0	0	2	0	0	0	0	0	0	0	0	0	0	0	0	0	0	0	0	0
Alloprevotella	0	0	0	0	0	0	0	0	0	0	2	0	0	0	0	0	0	0	0	0	0	0	0	0	0	0	0	0	0
Brevibacillus	0	0	0	0	0	0	0	0	0	0	0	2	0	0	0	0	0	0	0	0	0	0	0	0	0	0	0	0	0
Chryseomicrobium	0	0	0	0	0	0	0	0	0	0	0	0	0	0	0	0	0	0	0	0	0	0	0	0	2	0	0	0	0
Enhydrobacter	0	0	0	0	0	0	0	0	0	0	0	2	0	0	0	0	0	0	0	0	0	0	0	0	0	0	0	0	0
Luteococcus	0	0	0	0	0	0	0	0	0	0	0	0	0	0	0	0	0	0	0	0	0	2	0	0	0	0	0	0	0
Microbacterium	0	0	0	0	0	1	0	0	0	0	1	0	0	0	0	0	0	0	0	0	0	0	0	0	0	0	0	0	0
Morus	0	0	0	0	0	0	0	0	0	0	1	1	0	0	0	0	0	0	0	0	0	0	0	0	0	0	0	0	0
Nocardioides	0	0	0	0	0	0	0	0	0	0	0	1	0	0	0	0	0	0	0	0	0	0	0	0	1	0	0	0	0
Peptoniphilus	0	0	0	0	0	0	0	0	0	0	0	1	0	0	0	0	0	0	0	0	0	1	0	0	0	0	0	0	0
Planococcus	0	0	0	0	0	0	0	0	0	0	0	0	0	0	0	0	0	0	0	0	0	0	0	0	2	0	0	0	0
Rheinheimera	0	0	0	0	0	0	0	0	0	0	0	0	0	0	0	0	0	0	0	0	0	2	0	0	0	0	0	0	0
Rubellimicrobium	0	0	0	0	0	0	0	1	0	0	0	0	0	0	0	0	0	0	0	0	0	1	0	0	0	0	0	0	0
Salinibacterium	0	0	0	0	0	0	0	0	0	0	0	2	0	0	0	0	0	0	0	0	0	0	0	0	0	0	0	0	0
Sphingobacterium	0	0	0	0	0	0	0	0	0	0	1	1	0	0	0	0	0	0	0	0	0	0	0	0	0	0	0	0	0
Variovorax	0	0	0	0	0	0	0	0	0	0	0	0	0	0	0	0	0	0	0	0	0	2	0	0	0	0	0	0	0
Acidovorax	0	0	0	0	0	0	0	0	0	0	0	0	0	0	0	0	0	0	0	0	0	1	0	0	0	0	0	0	0
Actinomyces	0	0	0	0	0	0	0	0	0	0	0	0	0	0	0	0	0	0	0	0	0	1	0	0	0	0	0	0	0
Agrococcus	0	0	0	0	0	0	0	0	0	0	0	0	0	0	0	0	0	0	0	0	0	1	0	0	0	0	0	0	0
Aquincola	0	0	0	0	0	0	0	0	0	0	0	1	0	0	0	0	0	0	0	0	0	0	0	0	0	0	0	0	0
Azospira	0	0	0	0	0	0	0	0	0	0	0	0	0	0	0	0	0	0	0	1	0	0	0	0	0	0	0	0	0
Bacteriovorax	0	0	0	0	0	0	0	0	0	0	1	0	0	0	0	0	0	0	0	0	0	0	0	0	0	0	0	0	0
Bacteroides	0	0	0	0	0	0	0	0	0	0	0	0	0	0	0	0	0	0	0	0	1	0	0	0	0	0	0	0	0
Calothrix	0	0	0	0	0	0	0	0	0	0	0	0	0	1	0	0	0	0	0	0	0	0	0	0	0	0	0	0	0
Cronobacter	0	0	0	0	0	0	0	0	0	1	0	0	0	0	0	0	0	0	0	0	0	0	0	0	0	0	0	0	0
Dechloromonas	0	0	0	0	0	0	0	0	0	0	0	1	0	0	0	0	0	0	0	0	0	0	0	0	0	0	0	0	0
Devosia	0	0	0	0	0	0	0	0	0	0	0	0	0	0	0	0	0	0	0	0	1	0	0	0	0	0	0	0	0
Erythromicrobium	0	0	0	0	0	0	0	0	0	0	0	1	0	0	0	0	0	0	0	0	0	0	0	0	0	0	0	0	0
Facklamia	0	0	0	0	0	0	0	0	0	0	0	1	0	0	0	0	0	0	0	0	0	0	0	0	0	0	0	0	0
Ferribacterium	0	0	0	0	0	0	0	0	0	0	0	0	0	0	0	0	0	0	0	0	0	0	0	0	1	0	0	0	0
Fusobacterium	0	0	0	0	0	0	0	0	0	0	0	0	0	1	0	0	0	0	0	0	0	0	0	0	0	0	0	0	0
Geminicoccus	0	0	0	0	0	0	0	0	0	0	0	0	0	1	0	0	0	0	0	0	0	0	0	0	0	0	0	0	0
Gemmatimonas	0	0	0	0	0	0	0	1	0	0	0	0	0	0	0	0	0	0	0	0	0	0	0	0	0	0	0	0	0
Janibacter	0	0	0	0	0	0	0	0	0	0	0	0	0	1	0	0	0	0	0	0	0	0	0	0	0	0	0	0	0
Knoellia	0	0	0	0	0	0	0	0	0	0	0	1	0	0	0	0	0	0	0	0	0	0	0	0	0	0	0	0	0
Malikia	0	0	0	0	0	1	0	0	0	0	0	0	0	0	0	0	0	0	0	0	0	0	0	0	0	0	0	0	0
Melittangium	0	0	0	0	0	0	0	0	0	0	0	1	0	0	0	0	0	0	0	0	0	0	0	0	0	0	0	0	0
Methylobacterium	0	0	0	0	0	0	0	0	0	0	0	0	0	0	0	0	0	0	0	0	0	0	0	0	1	0	0	0	0
Methylophaga	0	0	0	0	0	0	0	0	0	0	1	0	0	0	0	0	0	0	0	0	0	0	0	0	0	0	0	0	0
Opitutus	0	0	0	0	0	0	0	0	0	0	0	0	0	0	0	0	0	0	0	0	1	0	0	0	0	0	0	0	0
Paeniglutamicibacter	0	0	0	0	0	0	0	0	0	0	1	0	0	0	0	0	0	0	0	0	0	0	0	0	0	0	0	0	0
Peptostreptococcus	0	0	0	0	0	0	0	0	0	0	0	1	0	0	0	0	0	0	0	0	0	0	0	0	0	0	0	0	0
Planomicrobium	0	0	0	0	0	0	0	0	0	0	0	1	0	0	0	0	0	0	0	0	0	0	0	0	0	0	0	0	0
Porphyromonas	0	0	0	0	0	0	0	0	0	0	0	0	0	1	0	0	0	0	0	0	0	0	0	0	0	0	0	0	0
Prevotella	0	0	0	0	0	0	0	0	0	0	0	1	0	0	0	0	0	0	0	0	0	0	0	0	0	0	0	0	0
Prevotellamassilia	0	0	0	0	0	0	0	0	0	0	0	1	0	0	0	0	0	0	0	0	0	0	0	0	0	0	0	0	0
Pseudarthrobacter	0	0	0	0	0	0	0	0	0	0	0	1	0	0	0	0	0	0	0	0	0	0	0	0	0	0	0	0	0
Pseudoclavibacter	0	0	0	0	0	0	0	0	0	0	0	1	0	0	0	0	0	0	0	0	0	0	0	0	0	0	0	0	0
Qipengyuania	0	0	0	0	0	0	0	0	0	0	0	0	0	0	0	0	0	0	0	0	1	0	0	0	0	0	0	0	0
Ralstonia	0	0	0	0	0	0	0	0	0	0	0	0	0	1	0	0	0	0	0	0	0	0	0	0	0	0	0	0	0
Reyranella	0	0	0	0	0	0	0	0	0	0	0	0	0	0	0	0	0	0	0	0	0	1	0	0	0	0	0	0	0
Rhizobium	0	0	0	0	0	0	0	0	0	0	0	1	0	0	0	0	0	0	0	0	0	0	0	0	0	0	0	0	0
Rhodoferax	0	1	0	0	0	0	0	0	0	0	0	0	0	0	0	0	0	0	0	0	0	0	0	0	0	0	0	0	0
Roseomonas	0	0	0	0	0	0	0	0	0	0	1	0	0	0	0	0	0	0	0	0	0	0	0	0	0	0	0	0	0
Roseovarius	0	0	0	0	0	0	0	0	0	0	0	0	0	0	0	0	0	0	0	1	0	0	0	0	0	0	0	0	0
Rubrivivax	0	0	0	0	0	0	0	0	0	0	0	1	0	0	0	0	0	0	0	0	0	0	0	0	0	0	0	0	0
Selenomonas	0	0	0	0	0	0	0	0	0	0	0	0	0	0	0	0	0	0	0	0	0	1	0	0	0	0	0	0	0
Shinella	0	0	0	0	0	0	0	0	0	0	0	1	0	0	0	0	0	0	0	0	0	0	0	0	0	0	0	0	0
Sphingomonas	0	0	0	0	0	0	0	0	0	0	0	1	0	0	0	0	0	0	0	0	0	0	0	0	0	0	0	0	0
Tetragenococcus	0	0	0	0	0	0	0	0	0	0	0	0	0	0	0	1	0	0	0	0	0	0	0	0	0	0	0	0	0
Thauera	0	0	0	0	0	0	0	0	0	0	0	0	0	0	0	0	0	0	0	0	0	0	0	0	1	0	0	0	0
Veillonella	0	0	0	0	0	0	0	0	0	0	0	0	0	1	0	0	0	0	0	0	0	0	0	0	0	0	0	0	0
Wautersiella	0	0	0	0	0	0	0	0	0	0	0	1	0	0	0	0	0	0	0	0	0	0	0	0	0	0	0	0	0
Weissella	0	1	0	0	0	0	0	0	0	0	0	0	0	0	0	0	0	0	0	0	0	0	0	0	0	0	0	0	0
Abiotrophia	0	0	0	0	0	0	0	0	0	0	0	0	0	0	0	0	0	0	0	0	0	0	0	0	0	0	0	0	0
Achromobacter	0	0	0	0	0	0	0	0	0	0	0	0	0	0	0	0	0	0	0	0	0	0	0	0	0	0	0	0	0
Acidibacter	0	0	0	0	0	0	0	0	0	0	0	0	0	0	0	0	0	0	0	0	0	0	0	0	0	0	0	0	0
Aciditerrimonas	0	0	0	0	0	0	0	0	0	0	0	0	0	0	0	0	0	0	0	0	0	0	0	0	0	0	0	0	0
Aeromicrobium	0	0	0	0	0	0	0	0	0	0	0	0	0	0	0	0	0	0	0	0	0	0	0	0	0	0	0	0	0
Alishewanella	0	0	0	0	0	0	0	0	0	0	0	0	0	0	0	0	0	0	0	0	0	0	0	0	0	0	0	0	0
Alistipes	0	0	0	0	0	0	0	0	0	0	0	0	0	0	0	0	0	0	0	0	0	0	0	0	0	0	0	0	0
Alkanindiges	0	0	0	0	0	0	0	0	0	0	0	0	0	0	0	0	0	0	0	0	0	0	0	0	0	0	0	0	0
Altererythrobacter	0	0	0	0	0	0	0	0	0	0	0	0	0	0	0	0	0	0	0	0	0	0	0	0	0	0	0	0	0
Alysiella	0	0	0	0	0	0	0	0	0	0	0	0	0	0	0	0	0	0	0	0	0	0	0	0	0	0	0	0	0
Aminobacter	0	0	0	0	0	0	0	0	0	0	0	0	0	0	0	0	0	0	0	0	0	0	0	0	0	0	0	0	0
Anaerococcus	0	0	0	0	0	0	0	0	0	0	0	0	0	0	0	0	0	0	0	0	0	0	0	0	0	0	0	0	0
Anoxybacillus	0	0	0	0	0	0	0	0	0	0	0	0	0	0	0	0	0	0	0	0	0	0	0	0	0	0	0	0	0
Aquabacterium	0	0	0	0	0	0	0	0	0	0	0	0	0	0	0	0	0	0	0	0	0	0	0	0	0	0	0	0	0
Aquihabitans	0	0	0	0	0	0	0	0	0	0	0	0	0	0	0	0	0	0	0	0	0	0	0	0	0	0	0	0	0
Aquitalea	0	0	0	0	0	0	0	0	0	0	0	0	0	0	0	0	0	0	0	0	0	0	0	0	0	0	0	0	0
Arboricoccus	0	0	0	0	0	0	0	0	0	0	0	0	0	0	0	0	0	0	0	0	0	0	0	0	0	0	0	0	0
Arenimonas	0	0	0	0	0	0	0	0	0	0	0	0	0	0	0	0	0	0	0	0	0	0	0	0	0	0	0	0	0
Arthrobacter	0	0	0	0	0	0	0	0	0	0	0	0	0	0	0	0	0	0	0	0	0	0	0	0	0	0	0	0	0
Asticcacaulis	0	0	0	0	0	0	0	0	0	0	0	0	0	0	0	0	0	0	0	0	0	0	0	0	0	0	0	0	0
Atopostipes	0	0	0	0	0	0	0	0	0	0	0	0	0	0	0	0	0	0	0	0	0	0	0	0	0	0	0	0	0
Aureimonas	0	0	0	0	0	0	0	0	0	0	0	0	0	0	0	0	0	0	0	0	0	0	0	0	0	0	0	0	0
Auricoccus	0	0	0	0	0	0	0	0	0	0	0	0	0	0	0	0	0	0	0	0	0	0	0	0	0	0	0	0	0
Azospirillum	0	0	0	0	0	0	0	0	0	0	0	0	0	0	0	0	0	0	0	0	0	0	0	0	0	0	0	0	0
Bergeyella	0	0	0	0	0	0	0	0	0	0	0	0	0	0	0	0	0	0	0	0	0	0	0	0	0	0	0	0	0
Bosea	0	0	0	0	0	0	0	0	0	0	0	0	0	0	0	0	0	0	0	0	0	0	0	0	0	0	0	0	0
Brachybacterium	0	0	0	0	0	0	0	0	0	0	0	0	0	0	0	0	0	0	0	0	0	0	0	0	0	0	0	0	0
Brachymonas	0	0	0	0	0	0	0	0	0	0	0	0	0	0	0	0	0	0	0	0	0	0	0	0	0	0	0	0	0
Bradyrhizobium	0	0	0	0	0	0	0	0	0	0	0	0	0	0	0	0	0	0	0	0	0	0	0	0	0	0	0	0	0
Brevibacterium	0	0	0	0	0	0	0	0	0	0	0	0	0	0	0	0	0	0	0	0	0	0	0	0	0	0	0	0	0
Burkholderia	0	0	0	0	0	0	0	0	0	0	0	0	0	0	0	0	0	0	0	0	0	0	0	0	0	0	0	0	0
Caballeronia	0	0	0	0	0	0	0	0	0	0	0	0	0	0	0	0	0	0	0	0	0	0	0	0	0	0	0	0	0
Caedibacter	0	0	0	0	0	0	0	0	0	0	0	0	0	0	0	0	0	0	0	0	0	0	0	0	0	0	0	0	0
Capnocytophaga	0	0	0	0	0	0	0	0	0	0	0	0	0	0	0	0	0	0	0	0	0	0	0	0	0	0	0	0	0
Carnobacterium	0	0	0	0	0	0	0	0	0	0	0	0	0	0	0	0	0	0	0	0	0	0	0	0	0	0	0	0	0
Caulobacter	0	0	0	0	0	0	0	0	0	0	0	0	0	0	0	0	0	0	0	0	0	0	0	0	0	0	0	0	0
Cecembia	0	0	0	0	0	0	0	0	0	0	0	0	0	0	0	0	0	0	0	0	0	0	0	0	0	0	0	0	0
Cellvibrio	0	0	0	0	0	0	0	0	0	0	0	0	0	0	0	0	0	0	0	0	0	0	0	0	0	0	0	0	0
Cereibacter	0	0	0	0	0	0	0	0	0	0	0	0	0	0	0	0	0	0	0	0	0	0	0	0	0	0	0	0	0
Chryseolinea	0	0	0	0	0	0	0	0	0	0	0	0	0	0	0	0	0	0	0	0	0	0	0	0	0	0	0	0	0
Citricoccus	0	0	0	0	0	0	0	0	0	0	0	0	0	0	0	0	0	0	0	0	0	0	0	0	0	0	0	0	0
Cnuella	0	0	0	0	0	0	0	0	0	0	0	0	0	0	0	0	0	0	0	0	0	0	0	0	0	0	0	0	0
Cohnella	0	0	0	0	0	0	0	0	0	0	0	0	0	0	0	0	0	0	0	0	0	0	0	0	0	0	0	0	0
Craurococcus	0	0	0	0	0	0	0	0	0	0	0	0	0	0	0	0	0	0	0	0	0	0	0	0	0	0	0	0	0
Croceicoccus	0	0	0	0	0	0	0	0	0	0	0	0	0	0	0	0	0	0	0	0	0	0	0	0	0	0	0	0	0
Cystobacter	0	0	0	0	0	0	0	0	0	0	0	0	0	0	0	0	0	0	0	0	0	0	0	0	0	0	0	0	0
Dermacoccus	0	0	0	0	0	0	0	0	0	0	0	0	0	0	0	0	0	0	0	0	0	0	0	0	0	0	0	0	0
Desemzia	0	0	0	0	0	0	0	0	0	0	0	0	0	0	0	0	0	0	0	0	0	0	0	0	0	0	0	0	0
Dietzia	0	0	0	0	0	0	0	0	0	0	0	0	0	0	0	0	0	0	0	0	0	0	0	0	0	0	0	0	0
Edaphobacter	0	0	0	0	0	0	0	0	0	0	0	0	0	0	0	0	0	0	0	0	0	0	0	0	0	0	0	0	0
Edaphobaculum	0	0	0	0	0	0	0	0	0	0	0	0	0	0	0	0	0	0	0	0	0	0	0	0	0	0	0	0	0
Empedobacter	0	0	0	0	0	0	0	0	0	0	0	0	0	0	0	0	0	0	0	0	0	0	0	0	0	0	0	0	0
Ensifer	0	0	0	0	0	0	0	0	0	0	0	0	0	0	0	0	0	0	0	0	0	0	0	0	0	0	0	0	0
Eubacterium	0	0	0	0	0	0	0	0	0	0	0	0	0	0	0	0	0	0	0	0	0	0	0	0	0	0	0	0	0
Ewingella	0	0	0	0	0	0	0	0	0	0	0	0	0	0	0	0	0	0	0	0	0	0	0	0	0	0	0	0	0
Falsirhodobacter	0	0	0	0	0	0	0	0	0	0	0	0	0	0	0	0	0	0	0	0	0	0	0	0	0	0	0	0	0
Fenollaria	0	0	0	0	0	0	0	0	0	0	0	0	0	0	0	0	0	0	0	0	0	0	0	0	0	0	0	0	0
Fimbriiglobus	0	0	0	0	0	0	0	0	0	0	0	0	0	0	0	0	0	0	0	0	0	0	0	0	0	0	0	0	0
Flaviaesturariibacter	0	0	0	0	0	0	0	0	0	0	0	0	0	0	0	0	0	0	0	0	0	0	0	0	0	0	0	0	0
Flavisolibacter	0	0	0	0	0	0	0	0	0	0	0	0	0	0	0	0	0	0	0	0	0	0	0	0	0	0	0	0	0
Flavitalea	0	0	0	0	0	0	0	0	0	0	0	0	0	0	0	0	0	0	0	0	0	0	0	0	0	0	0	0	0
Flavobacterium	0	0	0	0	0	0	0	0	0	0	0	0	0	0	0	0	0	0	0	0	0	0	0	0	0	0	0	0	0
Flectobacillus	0	0	0	0	0	0	0	0	0	0	0	0	0	0	0	0	0	0	0	0	0	0	0	0	0	0	0	0	0
Fluviicola	0	0	0	0	0	0	0	0	0	0	0	0	0	0	0	0	0	0	0	0	0	0	0	0	0	0	0	0	0
Friedmanniella	0	0	0	0	0	0	0	0	0	0	0	0	0	0	0	0	0	0	0	0	0	0	0	0	0	0	0	0	0
Gaiella	0	0	0	0	0	0	0	0	0	0	0	0	0	0	0	0	0	0	0	0	0	0	0	0	0	0	0	0	0
Gemmobacter	0	0	0	0	0	0	0	0	0	0	0	0	0	0	0	0	0	0	0	0	0	0	0	0	0	0	0	0	0
Geobacillus	0	0	0	0	0	0	0	0	0	0	0	0	0	0	0	0	0	0	0	0	0	0	0	0	0	0	0	0	0
Geodermatophilus	0	0	0	0	0	0	0	0	0	0	0	0	0	0	0	0	0	0	0	0	0	0	0	0	0	0	0	0	0
Gilliamella	0	0	0	0	0	0	0	0	0	0	0	0	0	0	0	0	0	0	0	0	0	0	0	0	0	0	0	0	0
Gordonia	0	0	0	0	0	0	0	0	0	0	0	0	0	0	0	0	0	0	0	0	0	0	0	0	0	0	0	0	0
Gracilibacillus	0	0	0	0	0	0	0	0	0	0	0	0	0	0	0	0	0	0	0	0	0	0	0	0	0	0	0	0	0
Granulicatella	0	0	0	0	0	0	0	0	0	0	0	0	0	0	0	0	0	0	0	0	0	0	0	0	0	0	0	0	0
Haemophilus	0	0	0	0	0	0	0	0	0	0	0	0	0	0	0	0	0	0	0	0	0	0	0	0	0	0	0	0	0
Hahella	0	0	0	0	0	0	0	0	0	0	0	0	0	0	0	0	0	0	0	0	0	0	0	0	0	0	0	0	0
Halomonas	0	0	0	0	0	0	0	0	0	0	0	0	0	0	0	0	0	0	0	0	0	0	0	0	0	0	0	0	0
Hydrogenophaga	0	0	0	0	0	0	0	0	0	0	0	0	0	0	0	0	0	0	0	0	0	0	0	0	0	0	0	0	0
Hyphomicrobium	0	0	0	0	0	0	0	0	0	0	0	0	0	0	0	0	0	0	0	0	0	0	0	0	0	0	0	0	0
Janthinobacterium	0	0	0	0	0	0	0	0	0	0	0	0	0	0	0	0	0	0	0	0	0	0	0	0	0	0	0	0	0
Jeotgalibaca	0	0	0	0	0	0	0	0	0	0	0	0	0	0	0	0	0	0	0	0	0	0	0	0	0	0	0	0	0
Kallipyga	0	0	0	0	0	0	0	0	0	0	0	0	0	0	0	0	0	0	0	0	0	0	0	0	0	0	0	0	0
Kineosporia	0	0	0	0	0	0	0	0	0	0	0	0	0	0	0	0	0	0	0	0	0	0	0	0	0	0	0	0	0
Lachnoanaerobaculum	0	0	0	0	0	0	0	0	0	0	0	0	0	0	0	0	0	0	0	0	0	0	0	0	0	0	0	0	0
Lautropia	0	0	0	0	0	0	0	0	0	0	0	0	0	0	0	0	0	0	0	0	0	0	0	0	0	0	0	0	0
Lawsonella	0	0	0	0	0	0	0	0	0	0	0	0	0	0	0	0	0	0	0	0	0	0	0	0	0	0	0	0	0
Lentibacillus	0	0	0	0	0	0	0	0	0	0	0	0	0	0	0	0	0	0	0	0	0	0	0	0	0	0	0	0	0
Leptotrichia	0	0	0	0	0	0	0	0	0	0	0	0	0	0	0	0	0	0	0	0	0	0	0	0	0	0	0	0	0
Luteibacter	0	0	0	0	0	0	0	0	0	0	0	0	0	0	0	0	0	0	0	0	0	0	0	0	0	0	0	0	0
Luteitalea	0	0	0	0	0	0	0	0	0	0	0	0	0	0	0	0	0	0	0	0	0	0	0	0	0	0	0	0	0
Luteolibacter	0	0	0	0	0	0	0	0	0	0	0	0	0	0	0	0	0	0	0	0	0	0	0	0	0	0	0	0	0
Macellibacteroides	0	0	0	0	0	0	0	0	0	0	0	0	0	0	0	0	0	0	0	0	0	0	0	0	0	0	0	0	0
Meiothermus	0	0	0	0	0	0	0	0	0	0	0	0	0	0	0	0	0	0	0	0	0	0	0	0	0	0	0	0	0
Membranicola	0	0	0	0	0	0	0	0	0	0	0	0	0	0	0	0	0	0	0	0	0	0	0	0	0	0	0	0	0
Mesorhizobium	0	0	0	0	0	0	0	0	0	0	0	0	0	0	0	0	0	0	0	0	0	0	0	0	0	0	0	0	0
Metaprevotella	0	0	0	0	0	0	0	0	0	0	0	0	0	0	0	0	0	0	0	0	0	0	0	0	0	0	0	0	0
Methylopila	0	0	0	0	0	0	0	0	0	0	0	0	0	0	0	0	0	0	0	0	0	0	0	0	0	0	0	0	0
Methylorubrum	0	0	0	0	0	0	0	0	0	0	0	0	0	0	0	0	0	0	0	0	0	0	0	0	0	0	0	0	0
Microbispora	0	0	0	0	0	0	0	0	0	0	0	0	0	0	0	0	0	0	0	0	0	0	0	0	0	0	0	0	0
Micrococcus	0	0	0	0	0	0	0	0	0	0	0	0	0	0	0	0	0	0	0	0	0	0	0	0	0	0	0	0	0
Microvirga	0	0	0	0	0	0	0	0	0	0	0	0	0	0	0	0	0	0	0	0	0	0	0	0	0	0	0	0	0
Mitsuokella	0	0	0	0	0	0	0	0	0	0	0	0	0	0	0	0	0	0	0	0	0	0	0	0	0	0	0	0	0
Mobilicoccus	0	0	0	0	0	0	0	0	0	0	0	0	0	0	0	0	0	0	0	0	0	0	0	0	0	0	0	0	0
Mogibacterium	0	0	0	0	0	0	0	0	0	0	0	0	0	0	0	0	0	0	0	0	0	0	0	0	0	0	0	0	0
Mongoliitalea	0	0	0	0	0	0	0	0	0	0	0	0	0	0	0	0	0	0	0	0	0	0	0	0	0	0	0	0	0
Mucilaginibacter	0	0	0	0	0	0	0	0	0	0	0	0	0	0	0	0	0	0	0	0	0	0	0	0	0	0	0	0	0
Mycetocola	0	0	0	0	0	0	0	0	0	0	0	0	0	0	0	0	0	0	0	0	0	0	0	0	0	0	0	0	0
Negativicoccus	0	0	0	0	0	0	0	0	0	0	0	0	0	0	0	0	0	0	0	0	0	0	0	0	0	0	0	0	0
Nicoletella	0	0	0	0	0	0	0	0	0	0	0	0	0	0	0	0	0	0	0	0	0	0	0	0	0	0	0	0	0
Nitrolancea	0	0	0	0	0	0	0	0	0	0	0	0	0	0	0	0	0	0	0	0	0	0	0	0	0	0	0	0	0
Nordella	0	0	0	0	0	0	0	0	0	0	0	0	0	0	0	0	0	0	0	0	0	0	0	0	0	0	0	0	0
Noviherbaspirillum	0	0	0	0	0	0	0	0	0	0	0	0	0	0	0	0	0	0	0	0	0	0	0	0	0	0	0	0	0
Novosphingobium	0	0	0	0	0	0	0	0	0	0	0	0	0	0	0	0	0	0	0	0	0	0	0	0	0	0	0	0	0
Oceanobacillus	0	0	0	0	0	0	0	0	0	0	0	0	0	0	0	0	0	0	0	0	0	0	0	0	0	0	0	0	0
Ochrobactrum	0	0	0	0	0	0	0	0	0	0	0	0	0	0	0	0	0	0	0	0	0	0	0	0	0	0	0	0	0
Ohtaekwangia	0	0	0	0	0	0	0	0	0	0	0	0	0	0	0	0	0	0	0	0	0	0	0	0	0	0	0	0	0
Olivibacter	0	0	0	0	0	0	0	0	0	0	0	0	0	0	0	0	0	0	0	0	0	0	0	0	0	0	0	0	0
Oribacterium	0	0	0	0	0	0	0	0	0	0	0	0	0	0	0	0	0	0	0	0	0	0	0	0	0	0	0	0	0
Ornithinimicrobium	0	0	0	0	0	0	0	0	0	0	0	0	0	0	0	0	0	0	0	0	0	0	0	0	0	0	0	0	0
Ottowia	0	0	0	0	0	0	0	0	0	0	0	0	0	0	0	0	0	0	0	0	0	0	0	0	0	0	0	0	0
Oxalicibacterium	0	0	0	0	0	0	0	0	0	0	0	0	0	0	0	0	0	0	0	0	0	0	0	0	0	0	0	0	0
Paludibaculum	0	0	0	0	0	0	0	0	0	0	0	0	0	0	0	0	0	0	0	0	0	0	0	0	0	0	0	0	0
Paraburkholderia	0	0	0	0	0	0	0	0	0	0	0	0	0	0	0	0	0	0	0	0	0	0	0	0	0	0	0	0	0
Parviterribacter	0	0	0	0	0	0	0	0	0	0	0	0	0	0	0	0	0	0	0	0	0	0	0	0	0	0	0	0	0
Pedobacter	0	0	0	0	0	0	0	0	0	0	0	0	0	0	0	0	0	0	0	0	0	0	0	0	0	0	0	0	0
Pelomonas	0	0	0	0	0	0	0	0	0	0	0	0	0	0	0	0	0	0	0	0	0	0	0	0	0	0	0	0	0
Phenylobacterium	0	0	0	0	0	0	0	0	0	0	0	0	0	0	0	0	0	0	0	0	0	0	0	0	0	0	0	0	0
Phycicoccus	0	0	0	0	0	0	0	0	0	0	0	0	0	0	0	0	0	0	0	0	0	0	0	0	0	0	0	0	0
Pinus	0	0	0	0	0	0	0	0	0	0	0	0	0	0	0	0	0	0	0	0	0	0	0	0	0	0	0	0	0
Planifilum	0	0	0	0	0	0	0	0	0	0	0	0	0	0	0	0	0	0	0	0	0	0	0	0	0	0	0	0	0
Polaromonas	0	0	0	0	0	0	0	0	0	0	0	0	0	0	0	0	0	0	0	0	0	0	0	0	0	0	0	0	0
Polymorphobacter	0	0	0	0	0	0	0	0	0	0	0	0	0	0	0	0	0	0	0	0	0	0	0	0	0	0	0	0	0
Porphyrobacter	0	0	0	0	0	0	0	0	0	0	0	0	0	0	0	0	0	0	0	0	0	0	0	0	0	0	0	0	0
Proteiniclasticum	0	0	0	0	0	0	0	0	0	0	0	0	0	0	0	0	0	0	0	0	0	0	0	0	0	0	0	0	0
Pseudochrobactrum	0	0	0	0	0	0	0	0	0	0	0	0	0	0	0	0	0	0	0	0	0	0	0	0	0	0	0	0	0
Pseudorhodoplanes	0	0	0	0	0	0	0	0	0	0	0	0	0	0	0	0	0	0	0	0	0	0	0	0	0	0	0	0	0
Psychrobacillus	0	0	0	0	0	0	0	0	0	0	0	0	0	0	0	0	0	0	0	0	0	0	0	0	0	0	0	0	0
Psychrobacter	0	0	0	0	0	0	0	0	0	0	0	0	0	0	0	0	0	0	0	0	0	0	0	0	0	0	0	0	0
Ramlibacter	0	0	0	0	0	0	0	0	0	0	0	0	0	0	0	0	0	0	0	0	0	0	0	0	0	0	0	0	0
Rehaibacterium	0	0	0	0	0	0	0	0	0	0	0	0	0	0	0	0	0	0	0	0	0	0	0	0	0	0	0	0	0
Rhizobacter	0	0	0	0	0	0	0	0	0	0	0	0	0	0	0	0	0	0	0	0	0	0	0	0	0	0	0	0	0
Rhodobacter	0	0	0	0	0	0	0	0	0	0	0	0	0	0	0	0	0	0	0	0	0	0	0	0	0	0	0	0	0
Rhodococcus	0	0	0	0	0	0	0	0	0	0	0	0	0	0	0	0	0	0	0	0	0	0	0	0	0	0	0	0	0
Rhodomicrobium	0	0	0	0	0	0	0	0	0	0	0	0	0	0	0	0	0	0	0	0	0	0	0	0	0	0	0	0	0
Rhodoplanes	0	0	0	0	0	0	0	0	0	0	0	0	0	0	0	0	0	0	0	0	0	0	0	0	0	0	0	0	0
Rhodopseudomonas	0	0	0	0	0	0	0	0	0	0	0	0	0	0	0	0	0	0	0	0	0	0	0	0	0	0	0	0	0
Romboutsia	0	0	0	0	0	0	0	0	0	0	0	0	0	0	0	0	0	0	0	0	0	0	0	0	0	0	0	0	0
Rubrobacter	0	0	0	0	0	0	0	0	0	0	0	0	0	0	0	0	0	0	0	0	0	0	0	0	0	0	0	0	0
Ruminococcus	0	0	0	0	0	0	0	0	0	0	0	0	0	0	0	0	0	0	0	0	0	0	0	0	0	0	0	0	0
Salinimicrobium	0	0	0	0	0	0	0	0	0	0	0	0	0	0	0	0	0	0	0	0	0	0	0	0	0	0	0	0	0
Sanguibacter	0	0	0	0	0	0	0	0	0	0	0	0	0	0	0	0	0	0	0	0	0	0	0	0	0	0	0	0	0
Sediminibacterium	0	0	0	0	0	0	0	0	0	0	0	0	0	0	0	0	0	0	0	0	0	0	0	0	0	0	0	0	0
Segetibacter	0	0	0	0	0	0	0	0	0	0	0	0	0	0	0	0	0	0	0	0	0	0	0	0	0	0	0	0	0
Simplicispira	0	0	0	0	0	0	0	0	0	0	0	0	0	0	0	0	0	0	0	0	0	0	0	0	0	0	0	0	0
Skermanella	0	0	0	0	0	0	0	0	0	0	0	0	0	0	0	0	0	0	0	0	0	0	0	0	0	0	0	0	0
Snodgrassella	0	0	0	0	0	0	0	0	0	0	0	0	0	0	0	0	0	0	0	0	0	0	0	0	0	0	0	0	0
Solirubrobacter	0	0	0	0	0	0	0	0	0	0	0	0	0	0	0	0	0	0	0	0	0	0	0	0	0	0	0	0	0
Solobacterium	0	0	0	0	0	0	0	0	0	0	0	0	0	0	0	0	0	0	0	0	0	0	0	0	0	0	0	0	0
Sphaerobacteraceae	0	0	0	0	0	0	0	0	0	0	0	0	0	0	0	0	0	0	0	0	0	0	0	0	0	0	0	0	0
Sphaerotilus	0	0	0	0	0	0	0	0	0	0	0	0	0	0	0	0	0	0	0	0	0	0	0	0	0	0	0	0	0
Sphingobium	0	0	0	0	0	0	0	0	0	0	0	0	0	0	0	0	0	0	0	0	0	0	0	0	0	0	0	0	0
Sphingopyxis	0	0	0	0	0	0	0	0	0	0	0	0	0	0	0	0	0	0	0	0	0	0	0	0	0	0	0	0	0
Spirosoma	0	0	0	0	0	0	0	0	0	0	0	0	0	0	0	0	0	0	0	0	0	0	0	0	0	0	0	0	0
Sporacetigenium	0	0	0	0	0	0	0	0	0	0	0	0	0	0	0	0	0	0	0	0	0	0	0	0	0	0	0	0	0
Sporolactobacillus	0	0	0	0	0	0	0	0	0	0	0	0	0	0	0	0	0	0	0	0	0	0	0	0	0	0	0	0	0
Starkeya	0	0	0	0	0	0	0	0	0	0	0	0	0	0	0	0	0	0	0	0	0	0	0	0	0	0	0	0	0
Stenotrophobacter	0	0	0	0	0	0	0	0	0	0	0	0	0	0	0	0	0	0	0	0	0	0	0	0	0	0	0	0	0
Succiniclasticum	0	0	0	0	0	0	0	0	0	0	0	0	0	0	0	0	0	0	0	0	0	0	0	0	0	0	0	0	0
Tepidisphaera	0	0	0	0	0	0	0	0	0	0	0	0	0	0	0	0	0	0	0	0	0	0	0	0	0	0	0	0	0
Tessaracoccus	0	0	0	0	0	0	0	0	0	0	0	0	0	0	0	0	0	0	0	0	0	0	0	0	0	0	0	0	0
Thermoactinomyces	0	0	0	0	0	0	0	0	0	0	0	0	0	0	0	0	0	0	0	0	0	0	0	0	0	0	0	0	0
Thermomonas	0	0	0	0	0	0	0	0	0	0	0	0	0	0	0	0	0	0	0	0	0	0	0	0	0	0	0	0	0
Thiobaca	0	0	0	0	0	0	0	0	0	0	0	0	0	0	0	0	0	0	0	0	0	0	0	0	0	0	0	0	0
Treponema	0	0	0	0	0	0	0	0	0	0	0	0	0	0	0	0	0	0	0	0	0	0	0	0	0	0	0	0	0
Trichococcus	0	0	0	0	0	0	0	0	0	0	0	0	0	0	0	0	0	0	0	0	0	0	0	0	0	0	0	0	0
Truepera	0	0	0	0	0	0	0	0	0	0	0	0	0	0	0	0	0	0	0	0	0	0	0	0	0	0	0	0	0
Turicibacter	0	0	0	0	0	0	0	0	0	0	0	0	0	0	0	0	0	0	0	0	0	0	0	0	0	0	0	0	0
Undibacterium	0	0	0	0	0	0	0	0	0	0	0	0	0	0	0	0	0	0	0	0	0	0	0	0	0	0	0	0	0
Vagococcus	0	0	0	0	0	0	0	0	0	0	0	0	0	0	0	0	0	0	0	0	0	0	0	0	0	0	0	0	0
Vicinamibacter	0	0	0	0	0	0	0	0	0	0	0	0	0	0	0	0	0	0	0	0	0	0	0	0	0	0	0	0	0
Virgibacillus	0	0	0	0	0	0	0	0	0	0	0	0	0	0	0	0	0	0	0	0	0	0	0	0	0	0	0	0	0
Vogesella	0	0	0	0	0	0	0	0	0	0	0	0	0	0	0	0	0	0	0	0	0	0	0	0	0	0	0	0	0
Zhihengliuella	0	0	0	0	0	0	0	0	0	0	0	0	0	0	0	0	0	0	0	0	0	0	0	0	0	0	0	0	0
g_Planobacterium	0	0	0	0	0	0	0	0	0	0	0	0	0	0	0	0	0	0	0	0	0	0	0	0	0	0	0	0	0
species
taxonomy	C1	C2	C3	C4	C5	C6	Q1	Q11	Q12	Q15	Q16	Q19	Q20	Q22	Q24	Q27	Q6	Q9	Z12	Z13	Z14	Z15	Z17	Z2	Z3	Z5	Z6	Z7	Z9
Lactobacillus_helveticus	6954	5654	5114	3011	8266	5157	7107	7117	9186	7636	4029	3828	8588	10434	7755	701	7013	11806	6406	7954	16	5840	5620	1002	33	9482	4619	10	450
Lactococcus_lactis	34	127	65	2050	36	1208	64	33	131	0	657	69	57	2	0	570	0	1	0	2	6	712	0	2	5	1	1	6181	3975
Lactobacillus_kefiranofaciens	2	9	1	15	13	4	0	1	0	0	0	0	1	0	1	0	15	0	6	0	0	0	1	7463	5912	20	8	0	0
Streptococcus_thermophilus	6	32	1	5	0	8	12	3	201	0	6	278	190	1	0	1462	0	0	7	0	4924	246	0	0	1	0	26	0	1467
Lactobacillus_kefiri	3	782	14	1	2	0	3	4	12	2	71	12	0	0	0	1789	5	1	0	0	0	6	0	5	102	0	13	0	0
Lactobacillus_delbrueckii	0	0	0	0	0	0	0	1	0	0	0	0	0	0	0	0	0	0	0	0	2735	0	0	0	1	0	0	0	0
Acetobacter_pasteurianus	52	296	1	46	2	9	0	15	15	49	638	0	4	160	2	143	26	58	0	161	0	34	48	88	0	0	11	0	0
unclassified	18	80	7	51	17	40	81	20	61	54	336	113	66	32	23	167	16	41	3	32	16	28	29	111	51	39	19	13	282
Klebsiella_oxytoca	3	21	0	5	0	12	9	7	17	47	1094	208	6	0	1	15	0	0	0	1	0	188	0	1	2	0	0	0	1
Lactococcus_garvieae	0	0	0	1	0	1	7	1	134	0	0	1468	2	0	1	0	0	1	0	0	0	1	0	0	0	0	0	0	0
Lactobacillus_pontis	56	0	1	20	3	12	0	23	27	6	51	0	53	318	36	0	8	130	0	167	0	257	80	0	0	75	3	0	0
Escherichia_fergusonii	0	1	0	0	0	0	26	7	0	549	431	5	6	0	0	21	0	0	0	3	0	0	0	1	0	0	0	0	1
Moraxella_osloensis	0	2	1	0	0	2	2	22	2	0	3	492	0	0	0	13	2	1	0	3	3	17	0	2	3	0	0	0	0
Lactobacillus_fermentum	2	0	0	0	1	0	0	1	0	0	1	0	102	0	0	433	0	0	0	0	0	1	0	0	0	0	0	0	0
Acinetobacter_johnsonii	2	0	0	29	0	5	15	2	4	3	0	301	1	1	0	0	0	0	0	0	2	12	0	2	11	0	0	0	2
Klebsiella_pneumoniae	0	0	0	0	0	0	4	0	0	0	1	341	0	0	0	0	0	0	0	4	0	38	0	0	0	0	0	0	0
Enterobacter_cloacae	0	12	0	18	0	1	32	0	58	1	46	19	103	0	0	11	0	0	0	2	1	12	0	0	0	0	0	0	41
Acetobacter_ghanensis	0	1	0	3	0	2	1	0	0	0	15	0	0	1	0	0	0	0	0	178	2	1	2	0	90	0	29	0	0
Streptococcus_parasuis	0	0	0	0	0	0	150	0	1	0	1	77	0	0	0	1	0	0	0	1	0	3	0	0	0	0	0	0	15
Acinetobacter_calcoaceticus	0	0	0	0	0	0	0	0	0	0	0	221	0	1	0	0	0	0	0	2	0	3	0	0	0	0	0	0	0
Macrococcus_caseolyticus	0	1	0	1	0	0	0	0	59	3	6	18	10	0	0	0	0	0	0	91	0	15	0	0	0	0	1	0	1
Lactococcus_raffinolactis	10	0	0	0	0	0	5	1	2	0	0	8	1	0	0	0	0	0	0	0	0	2	0	0	0	0	0	5	161
Lactobacillus_diolivorans	4	138	1	0	2	0	0	0	0	0	9	0	0	0	0	1	0	1	0	0	0	1	0	0	0	0	1	0	1
Lactobacillus_parakefiri	2	14	0	0	2	0	0	2	6	3	17	0	1	3	0	36	5	27	1	5	0	1	0	1	0	3	0	0	0
Enterobacter_hormaechei	0	1	0	5	0	1	15	0	14	21	36	6	9	0	0	2	0	0	0	0	0	3	0	0	0	0	0	0	10
Acinetobacter_septicus	0	0	0	0	0	0	0	0	0	0	0	118	0	0	0	0	0	0	0	1	0	3	0	0	0	0	0	0	0
Streptococcus_salivarius	1	1	0	0	0	1	0	0	2	0	0	3	11	0	0	29	0	0	0	0	2	1	0	0	0	0	0	0	46
Leuconostoc_mesenteroides	0	1	0	0	0	0	1	0	0	0	33	4	0	1	0	9	0	1	0	1	0	1	0	0	0	0	0	2	22
Acinetobacter_lwoffii	0	0	0	0	0	0	0	10	1	0	1	38	0	0	0	0	0	1	0	0	3	5	0	0	5	0	0	0	0
Enterobacter_asburiae	0	2	0	2	0	1	6	0	5	3	10	10	16	0	0	1	0	0	0	0	0	3	0	0	0	0	0	0	4
Acetobacter_musti	1	5	0	1	0	0	0	2	3	1	2	0	2	21	0	1	0	20	0	0	0	2	0	0	0	1	0	0	0
Cutibacterium_acnes	0	0	0	0	0	0	0	3	0	0	2	4	0	8	0	1	0	0	0	0	10	26	0	0	0	0	0	0	1
Acetobacter_estunensis	1	9	0	1	0	0	0	0	0	0	16	0	0	1	0	11	5	0	0	1	0	3	0	0	0	0	0	0	1
Enterococcus_durans	0	3	0	0	0	0	0	0	0	0	0	1	2	0	0	40	0	0	0	2	0	0	0	0	0	0	0	0	1
Acetobacter_malorum	0	1	0	0	0	0	0	1	0	0	28	0	0	0	0	9	0	0	0	4	0	1	0	0	0	0	1	0	3
Bifidobacterium_animalis	0	0	0	0	0	0	0	4	0	0	5	0	0	0	0	0	31	0	0	0	1	3	0	1	1	0	0	0	0
Clostridium_intestinale	0	0	0	0	0	0	0	0	0	0	0	0	0	0	0	0	0	0	0	0	0	0	0	0	37	0	0	0	0
Enterococcus_italicus	0	0	0	0	0	0	0	0	0	0	0	21	0	0	0	0	0	0	0	0	0	16	0	0	0	0	0	0	0
Kocuria_salsicia	0	0	0	0	0	0	0	0	0	0	0	30	0	0	0	0	0	0	0	4	0	0	0	0	0	0	0	0	0
Serratia_liquefaciens	0	0	0	0	0	0	0	0	0	30	4	0	0	0	0	0	0	0	0	0	0	0	0	0	0	0	0	0	0
Enterococcus_faecalis	1	0	2	0	0	1	1	0	0	1	1	6	0	0	0	4	0	0	0	1	0	15	0	0	0	0	0	0	0
Curvibacter_lanceolatus	0	0	0	0	0	0	0	2	0	0	3	6	0	3	0	0	0	0	0	4	1	9	0	0	3	0	0	0	0
Lactobacillus_gallinarum	1	0	1	0	2	0	7	0	1	1	1	0	3	0	0	2	2	3	0	1	2	0	0	1	0	0	3	0	0
Enterococcus_faecium	0	0	0	0	0	0	0	0	0	0	0	2	1	0	0	11	0	1	0	12	0	3	0	0	0	0	0	0	0
Lactobacillus_paracasei	0	1	0	0	0	0	0	1	0	0	0	2	0	0	0	0	0	0	0	0	0	8	1	0	0	0	0	0	16
Staphylococcus_vitulinus	0	0	0	0	0	0	0	0	0	0	0	26	0	0	0	0	0	0	0	1	0	1	1	0	0	0	0	0	0
Kluyvera_intermedia	0	0	0	18	0	4	2	0	0	0	0	0	2	0	0	1	0	0	0	0	0	1	0	0	0	0	0	0	0
Thermus_scotoductus	1	0	0	0	0	0	0	0	0	1	0	23	0	0	0	0	0	0	0	0	0	0	0	0	1	0	0	0	0
Comamonas_sediminis	0	0	0	0	0	0	0	0	0	0	0	25	0	0	0	0	0	0	0	0	0	0	0	0	0	0	0	0	0
Lactobacillus_frumenti	1	0	0	0	0	1	0	1	0	3	1	0	0	1	2	0	0	3	0	2	0	7	2	0	0	0	0	0	0
Staphylococcus_capitis	0	0	0	0	0	0	0	0	0	0	0	2	0	3	0	0	0	0	0	4	1	13	0	0	1	0	0	0	0
Staphylococcus_equorum	0	0	0	0	0	0	0	0	1	0	0	23	0	0	0	0	0	0	0	0	0	0	0	0	0	0	0	0	0
Chryseobacterium_bovis	0	0	0	0	0	1	0	0	0	0	0	0	0	1	0	0	0	0	0	0	0	20	0	0	0	0	0	0	0
Staphylococcus_schleiferi	0	0	0	0	0	0	0	0	0	0	0	18	0	0	0	0	0	0	0	3	0	0	1	0	0	0	0	0	0
Gemella_palaticanis	0	0	0	0	0	0	0	0	0	0	0	20	0	0	0	0	0	0	0	0	0	0	0	0	0	0	0	0	0
Lactobacillus_leichmannii	0	0	0	0	0	0	0	0	0	0	0	0	0	0	0	0	0	0	0	0	20	0	0	0	0	0	0	0	0
Streptococcus_parauberis	0	0	0	0	0	0	0	0	0	0	0	0	20	0	0	0	0	0	0	0	0	0	0	0	0	0	0	0	0
Acinetobacter_guillouiae	0	0	1	0	0	0	0	0	0	0	0	15	0	0	0	0	0	0	0	0	0	0	0	0	3	0	0	0	0
Aeromonas_hydrophila	0	1	0	0	0	0	15	0	0	0	0	2	0	0	0	0	0	0	0	0	0	1	0	0	0	0	0	0	0
Citrobacter_freundii	0	0	0	1	0	0	0	0	0	0	17	1	0	0	0	0	0	0	0	0	0	0	0	0	0	0	0	0	0
Acetobacter_cibinongensis	0	0	0	0	0	0	0	0	0	0	1	0	0	0	0	1	0	0	0	0	0	0	0	0	0	0	0	0	15
Komagataeibacter_swingsii	0	1	0	0	0	0	0	0	0	0	0	0	0	7	0	0	0	0	0	9	0	0	0	0	0	0	0	0	0
Staphylococcus_succinus	1	0	0	0	0	0	0	0	0	0	0	14	0	0	0	0	0	0	0	0	0	0	0	0	0	0	0	0	0
Lactobacillus_hamsteri	0	1	0	1	0	1	0	2	0	0	0	0	3	0	0	0	0	0	0	0	0	1	0	2	0	0	1	0	1
Lactobacillus_plantarum	0	0	0	0	0	0	0	1	0	0	0	0	0	0	0	1	0	0	0	9	0	1	0	0	0	0	0	0	0
Chryseobacterium_nakagawai	0	0	0	0	0	0	0	0	0	0	0	10	0	0	0	0	0	0	0	0	0	0	0	0	0	0	0	0	0
Leuconostoc_lactis	1	0	0	0	0	1	0	0	2	0	0	1	0	0	0	5	0	0	0	0	0	0	0	0	0	0	0	0	0
Pseudomonas_fulva	0	0	0	0	0	0	0	0	0	0	0	8	0	0	0	0	0	0	0	0	0	2	0	0	0	0	0	0	0
Actinobacillus_equuli	0	0	0	0	0	0	0	0	0	0	3	6	0	0	0	0	0	0	0	0	0	0	0	0	0	0	0	0	0
Gluconobacter_oxydans	0	0	0	0	1	0	0	0	0	0	0	0	0	0	0	7	0	0	0	0	0	0	1	0	0	0	0	0	0
Staphylococcus_aureus	0	0	0	0	0	0	0	1	0	0	0	3	0	0	0	0	0	0	0	1	0	2	0	0	0	0	0	0	1
Acinetobacter_parvus	0	0	0	0	0	0	5	0	0	0	0	2	0	0	0	0	0	0	0	0	0	0	0	0	0	0	0	0	0
Acinetobacter_radioresistens	0	0	0	0	0	0	0	0	0	0	0	7	0	0	0	0	0	0	0	0	0	0	0	0	0	0	0	0	0
Comamonas_terrigena	0	0	1	0	0	0	0	0	0	0	0	6	0	0	0	0	0	0	0	0	0	0	0	0	0	0	0	0	0
Paenibacillus_pasadenensis	0	0	0	0	0	0	0	0	0	0	0	7	0	0	0	0	0	0	0	0	0	0	0	0	0	0	0	0	0
Rothia_endophytica	0	0	0	0	0	0	0	0	0	0	0	4	0	0	0	0	0	0	0	3	0	0	0	0	0	0	0	0	0
Staphylococcus_epidermidis	0	0	0	0	0	0	0	0	0	0	0	2	0	0	0	0	0	0	0	0	0	5	0	0	0	0	0	0	0
Deinococcus_geothermalis	0	0	0	0	0	0	0	0	0	0	0	5	0	0	0	0	0	0	0	0	0	1	0	0	0	0	0	0	0
Paenibacillus_validus	0	0	0	0	0	0	0	0	0	0	0	4	0	2	0	0	0	0	0	0	0	0	0	0	0	0	0	0	0
Paracoccus_sphaerophysae	0	0	0	0	0	0	0	2	0	0	0	0	0	0	0	0	0	0	0	0	1	3	0	0	0	0	0	0	0
Propionibacterium_granulosum	0	0	0	0	0	0	0	0	0	0	0	0	0	3	0	0	0	0	0	0	0	3	0	0	0	0	0	0	0
Staphylococcus_warneri	0	0	0	0	0	0	0	0	0	0	0	1	0	0	0	0	0	0	0	0	0	5	0	0	0	0	0	0	0
Stenotrophomonas_maltophilia	0	0	0	0	0	0	0	0	0	0	0	3	0	0	0	0	0	0	0	0	0	0	0	0	3	0	0	0	0
Streptococcus_minor	0	0	0	0	0	0	0	0	0	0	0	6	0	0	0	0	0	0	0	0	0	0	0	0	0	0	0	0	0
Acetobacter_cerevisiae	0	0	0	0	0	0	0	0	1	0	1	0	0	0	0	2	0	1	0	0	0	0	0	0	0	0	0	0	0
Acetobacter_syzygii	0	0	1	0	0	0	0	0	0	0	0	0	0	0	0	0	0	0	0	3	0	0	0	0	1	0	0	0	0
Chryseobacterium_haifense	0	0	0	0	0	0	0	0	0	0	0	4	0	0	0	0	0	0	0	0	0	1	0	0	0	0	0	0	0
Corynebacterium_accolens	0	0	0	0	0	0	0	0	0	0	0	0	0	1	0	0	0	0	0	0	1	3	0	0	0	0	0	0	0
Delftia_acidovorans	0	0	0	0	0	0	0	0	0	0	0	3	0	0	0	0	0	0	0	0	0	2	0	0	0	0	0	0	0
Enterococcus_casseliflavus	0	0	0	0	0	0	0	0	0	0	0	5	0	0	0	0	0	0	0	0	0	0	0	0	0	0	0	0	0
Herbaspirillum_huttiense	0	0	0	0	0	0	0	0	0	0	4	0	0	1	0	0	0	0	0	0	0	0	0	0	0	0	0	0	0
Massilia_oculi	0	0	0	0	0	0	0	0	0	0	0	5	0	0	0	0	0	0	0	0	0	0	0	0	0	0	0	0	0
Massilia_suwonensis	0	0	0	0	0	0	0	0	0	0	0	4	0	0	0	0	0	0	0	0	0	0	0	0	1	0	0	0	0
Massilia_timonae	0	0	0	0	0	0	0	0	0	0	0	5	0	0	0	0	0	0	0	0	0	0	0	0	0	0	0	0	0
Staphylococcus_saprophyticus	0	0	0	0	0	0	0	0	0	0	0	4	1	0	0	0	0	0	0	0	0	0	0	0	0	0	0	0	0
Streptococcus_gallolyticus	0	0	0	0	0	0	0	0	0	0	0	3	0	0	0	1	0	0	0	0	0	1	0	0	0	0	0	0	0
Acetobacter_pomorum	0	0	0	1	0	0	0	0	0	0	2	0	0	0	0	1	0	0	0	0	0	0	0	0	0	0	0	0	0
Brevundimonas_bullata	0	0	0	0	0	0	0	0	0	0	0	0	0	0	0	0	0	0	0	0	2	1	0	0	1	0	0	0	0
Luteimonas_tolerans	0	0	0	0	0	0	0	0	0	0	0	4	0	0	0	0	0	0	0	0	0	0	0	0	0	0	0	0	0
Pantoea_agglomerans	0	0	0	0	0	0	0	0	0	0	1	3	0	0	0	0	0	0	0	0	0	0	0	0	0	0	0	0	0
Pseudoxanthomonas_japonensis	0	0	0	0	1	0	0	0	0	0	0	2	0	0	0	0	0	0	0	0	0	1	0	0	0	0	0	0	0
Serratia_marcescens	0	0	0	0	0	0	0	0	0	0	0	3	0	0	0	0	0	0	0	0	0	0	0	0	0	1	0	0	0
Cloacibacterium_normanense	1	0	0	0	0	0	0	0	0	0	0	0	0	0	0	0	0	1	0	0	1	0	0	0	0	0	0	0	0
Clostridium_propionicum	0	0	0	0	0	0	0	0	0	0	0	0	0	0	0	0	0	0	0	0	0	0	0	0	3	0	0	0	0
Enterobacter_ludwigii	0	0	0	0	0	0	0	0	0	0	0	1	1	0	0	0	0	0	0	0	0	0	0	0	0	0	0	0	1
Finegoldia_magna	0	0	0	0	0	0	0	0	0	0	0	0	0	0	0	0	0	0	0	3	0	0	0	0	0	0	0	0	0
Gluconacetobacter_rhaeticus	0	0	0	3	0	0	0	0	0	0	0	0	0	0	0	0	0	0	0	0	0	0	0	0	0	0	0	0	0
Lactobacillus_reuteri	0	0	0	0	0	0	0	0	0	0	0	3	0	0	0	0	0	0	0	0	0	0	0	0	0	0	0	0	0
Lysinibacillus_chungkukjangi	0	0	0	0	0	0	0	0	0	0	0	3	0	0	0	0	0	0	0	0	0	0	0	0	0	0	0	0	0
Massilia_varians	0	0	0	0	0	0	0	0	0	0	0	3	0	0	0	0	0	0	0	0	0	0	0	0	0	0	0	0	0
Propionibacterium_avidum	0	0	0	0	0	0	0	0	0	0	0	3	0	0	0	0	0	0	0	0	0	0	0	0	0	0	0	0	0
Raoultella_planticola	0	0	1	0	0	0	0	0	0	0	1	0	1	0	0	0	0	0	0	0	0	0	0	0	0	0	0	0	0
Acetobacter_aceti	0	0	0	1	0	0	0	0	0	0	1	0	0	0	0	0	0	0	0	0	0	0	0	0	0	0	0	0	0
Acetobacter_fabarum	0	0	0	0	0	0	0	0	0	0	0	0	0	0	0	0	0	0	0	0	0	0	0	0	2	0	0	0	0
Acinetobacter_baumannii	0	0	0	0	0	0	2	0	0	0	0	0	0	0	0	0	0	0	0	0	0	0	0	0	0	0	0	0	0
Aerococcus_viridans	0	0	0	0	0	0	0	0	0	0	0	2	0	0	0	0	0	0	0	0	0	0	0	0	0	0	0	0	0
Alloprevotella_rava	0	0	0	0	0	0	0	0	0	0	2	0	0	0	0	0	0	0	0	0	0	0	0	0	0	0	0	0	0
Bacillus_longiquaesitum	0	0	0	0	0	0	0	0	0	0	1	1	0	0	0	0	0	0	0	0	0	0	0	0	0	0	0	0	0
Brevibacillus_agri	0	0	0	0	0	0	0	0	0	0	0	2	0	0	0	0	0	0	0	0	0	0	0	0	0	0	0	0	0
Brevundimonas_mediterranea	0	0	0	0	0	0	0	1	0	0	0	0	0	0	0	0	0	0	0	0	0	1	0	0	0	0	0	0	0
Chryseobacterium_profundimaris	0	0	0	0	0	0	0	0	0	0	0	2	0	0	0	0	0	0	0	0	0	0	0	0	0	0	0	0	0
Chryseomicrobium_imtechense	0	0	0	0	0	0	0	0	0	0	0	0	0	0	0	0	0	0	0	0	0	0	0	0	2	0	0	0	0
Citrobacter_murliniae	0	0	0	1	0	0	0	0	0	0	1	0	0	0	0	0	0	0	0	0	0	0	0	0	0	0	0	0	0
Duganella_zoogloeoides	0	2	0	0	0	0	0	0	0	0	0	0	0	0	0	0	0	0	0	0	0	0	0	0	0	0	0	0	0
Enhydrobacter_aerosaccus	0	0	0	0	0	0	0	0	0	0	0	2	0	0	0	0	0	0	0	0	0	0	0	0	0	0	0	0	0
Enterobacter_amnigenus	0	0	0	0	0	0	0	0	2	0	0	0	0	0	0	0	0	0	0	0	0	0	0	0	0	0	0	0	0
Enterobacter_kobei	0	0	0	0	0	0	0	0	0	0	1	0	0	0	0	0	0	0	0	0	1	0	0	0	0	0	0	0	0
Exiguobacterium_acetylicum	0	0	0	0	0	0	0	0	0	0	0	2	0	0	0	0	0	0	0	0	0	0	0	0	0	0	0	0	0
Jeotgalicoccus_halotolerans	0	0	0	0	0	0	0	0	0	0	0	0	0	0	0	0	0	0	0	0	0	0	0	0	2	0	0	0	0
Kocuria_varians	0	0	0	0	0	0	0	0	0	0	0	2	0	0	0	0	0	0	0	0	0	0	0	0	0	0	0	0	0
Lactococcus_taiwanensis	0	0	0	0	0	0	0	0	0	0	0	0	1	0	0	1	0	0	0	0	0	0	0	0	0	0	0	0	0
Luteococcus_peritonei	0	0	0	0	0	0	0	0	0	0	0	0	0	0	0	0	0	0	0	0	0	2	0	0	0	0	0	0	0
Morus_indica	0	0	0	0	0	0	0	0	0	0	1	1	0	0	0	0	0	0	0	0	0	0	0	0	0	0	0	0	0
Paracoccus_marcusii	0	1	0	0	0	0	0	0	0	0	0	0	0	0	0	0	0	0	0	1	0	0	0	0	0	0	0	0	0
Peptoniphilus_lacydonensis	0	0	0	0	0	0	0	0	0	0	0	1	0	0	0	0	0	0	0	0	0	1	0	0	0	0	0	0	0
Planococcus_citreus	0	0	0	0	0	0	0	0	0	0	0	0	0	0	0	0	0	0	0	0	0	0	0	0	2	0	0	0	0
Rheinheimera_mesophila	0	0	0	0	0	0	0	0	0	0	0	0	0	0	0	0	0	0	0	0	0	2	0	0	0	0	0	0	0
Streptococcus_dysgalactiae	0	0	0	0	0	0	2	0	0	0	0	0	0	0	0	0	0	0	0	0	0	0	0	0	0	0	0	0	0
Streptococcus_oralis	0	0	0	0	0	0	0	0	0	0	0	0	0	2	0	0	0	0	0	0	0	0	0	0	0	0	0	0	0
Variovorax_boronicumulans	0	0	0	0	0	0	0	0	0	0	0	0	0	0	0	0	0	0	0	0	0	2	0	0	0	0	0	0	0
Acetobacter_lovaniensis	0	0	0	0	0	0	0	0	0	0	0	0	0	0	0	0	0	0	0	0	0	0	0	0	1	0	0	0	0
Acetobacter_orientalis	0	0	0	0	0	0	0	0	0	0	1	0	0	0	0	0	0	0	0	0	0	0	0	0	0	0	0	0	0
Acinetobacter_pittii	0	0	0	0	0	0	0	0	0	0	0	1	0	0	0	0	0	0	0	0	0	0	0	0	0	0	0	0	0
Acinetobacter_ursingii	0	0	0	0	0	0	0	0	0	0	0	1	0	0	0	0	0	0	0	0	0	0	0	0	0	0	0	0	0
Actinomyces_oris	0	0	0	0	0	0	0	0	0	0	0	0	0	0	0	0	0	0	0	0	0	1	0	0	0	0	0	0	0
Aeromonas_caviae	0	0	0	0	0	0	1	0	0	0	0	0	0	0	0	0	0	0	0	0	0	0	0	0	0	0	0	0	0
Aeromonas_media	0	0	0	0	0	0	1	0	0	0	0	0	0	0	0	0	0	0	0	0	0	0	0	0	0	0	0	0	0
Aeromonas_salmonicida	0	0	0	0	0	0	1	0	0	0	0	0	0	0	0	0	0	0	0	0	0	0	0	0	0	0	0	0	0
Agrococcus_jenensis	0	0	0	0	0	0	0	0	0	0	0	0	0	0	0	0	0	0	0	0	0	1	0	0	0	0	0	0	0
Aquincola_tertiaricarbonis	0	0	0	0	0	0	0	0	0	0	0	1	0	0	0	0	0	0	0	0	0	0	0	0	0	0	0	0	0
Azospira_oryzae	0	0	0	0	0	0	0	0	0	0	0	0	0	0	0	0	0	0	0	1	0	0	0	0	0	0	0	0	0
Bacillus_aidingensis	0	0	0	0	0	0	0	0	0	0	0	1	0	0	0	0	0	0	0	0	0	0	0	0	0	0	0	0	0
Bacillus_cereus	0	0	0	0	0	0	0	0	0	0	0	1	0	0	0	0	0	0	0	0	0	0	0	0	0	0	0	0	0
Bacillus_odysseyi	0	0	0	0	0	0	0	0	0	0	1	0	0	0	0	0	0	0	0	0	0	0	0	0	0	0	0	0	0
Bacillus_subtilis	0	0	0	0	0	0	0	0	0	0	0	1	0	0	0	0	0	0	0	0	0	0	0	0	0	0	0	0	0
Bacteriovorax_stolpii	0	0	0	0	0	0	0	0	0	0	1	0	0	0	0	0	0	0	0	0	0	0	0	0	0	0	0	0	0
Brevundimonas_diminuta	0	0	0	0	0	0	0	0	0	0	0	1	0	0	0	0	0	0	0	0	0	0	0	0	0	0	0	0	0
Brevundimonas_kwangchunensis	0	0	0	0	0	0	0	0	0	0	0	1	0	0	0	0	0	0	0	0	0	0	0	0	0	0	0	0	0
Calothrix_desertica	0	0	0	0	0	0	0	0	0	0	0	0	0	1	0	0	0	0	0	0	0	0	0	0	0	0	0	0	0
Chryseobacterium_aquaticum	0	0	0	0	0	0	0	0	0	0	0	0	0	0	0	0	0	1	0	0	0	0	0	0	0	0	0	0	0
Comamonas_testosteroni	0	0	0	0	0	0	0	0	0	0	0	1	0	0	0	0	0	0	0	0	0	0	0	0	0	0	0	0	0
Corynebacterium_lipophiloflavum	0	0	0	0	0	0	0	0	0	0	0	0	0	0	0	0	0	0	0	1	0	0	0	0	0	0	0	0	0
Corynebacterium_matruchotii	0	0	0	0	0	0	0	0	0	0	0	0	0	0	0	0	0	0	0	0	0	1	0	0	0	0	0	0	0
Corynebacterium_suicordis	0	0	0	0	0	0	0	0	0	0	0	0	0	0	0	0	0	0	0	0	0	1	0	0	0	0	0	0	0
Curvibacter_gracilis	0	0	0	0	0	0	0	0	0	0	0	1	0	0	0	0	0	0	0	0	0	0	0	0	0	0	0	0	0
Deinococcus_antarcticus	0	0	0	0	0	0	0	1	0	0	0	0	0	0	0	0	0	0	0	0	0	0	0	0	0	0	0	0	0
Deinococcus_ficus	0	0	0	0	0	0	0	0	0	0	0	0	0	0	0	0	0	0	0	1	0	0	0	0	0	0	0	0	0
Deinococcus_wulumuqiensis	0	0	0	0	0	0	0	0	0	0	0	0	0	0	0	0	0	0	0	0	0	1	0	0	0	0	0	0	0
Duganella_ginsengisoli	1	0	0	0	0	0	0	0	0	0	0	0	0	0	0	0	0	0	0	0	0	0	0	0	0	0	0	0	0
Exiguobacterium_aurantiacum	0	0	0	0	0	0	0	0	0	0	0	1	0	0	0	0	0	0	0	0	0	0	0	0	0	0	0	0	0
Ferribacterium_limneticum	0	0	0	0	0	0	0	0	0	0	0	0	0	0	0	0	0	0	0	0	0	0	0	0	1	0	0	0	0
Fusobacterium_nucleatum	0	0	0	0	0	0	0	0	0	0	0	0	0	1	0	0	0	0	0	0	0	0	0	0	0	0	0	0	0
Geminicoccus_roseus	0	0	0	0	0	0	0	0	0	0	0	0	0	1	0	0	0	0	0	0	0	0	0	0	0	0	0	0	0
Janibacter_melonis	0	0	0	0	0	0	0	0	0	0	0	0	0	1	0	0	0	0	0	0	0	0	0	0	0	0	0	0	0
Jeotgalicoccus_psychrophilus	0	0	0	0	0	0	0	0	0	0	0	1	0	0	0	0	0	0	0	0	0	0	0	0	0	0	0	0	0
Klebsiella_grimontii	0	0	0	0	0	0	0	0	0	0	1	0	0	0	0	0	0	0	0	0	0	0	0	0	0	0	0	0	0
Klebsiella_variicola	0	0	0	0	0	0	0	0	0	0	0	1	0	0	0	0	0	0	0	0	0	0	0	0	0	0	0	0	0
Knoellia_locipacati	0	0	0	0	0	0	0	0	0	0	0	1	0	0	0	0	0	0	0	0	0	0	0	0	0	0	0	0	0
Komagataeibacter_sucrofermentans	0	0	0	0	0	0	0	1	0	0	0	0	0	0	0	0	0	0	0	0	0	0	0	0	0	0	0	0	0
Lactobacillus_crustorum	0	0	0	0	0	0	0	1	0	0	0	0	0	0	0	0	0	0	0	0	0	0	0	0	0	0	0	0	0
Lactobacillus_gorillae	0	0	0	0	0	0	0	0	0	0	0	0	0	0	0	1	0	0	0	0	0	0	0	0	0	0	0	0	0
Lactobacillus_kitasatonis	0	0	0	0	0	0	0	1	0	0	0	0	0	0	0	0	0	0	0	0	0	0	0	0	0	0	0	0	0
Lactobacillus_kullabergensis	0	0	0	0	0	0	0	0	0	0	0	1	0	0	0	0	0	0	0	0	0	0	0	0	0	0	0	0	0
Lactobacillus_oris	0	0	0	0	0	0	0	0	0	0	0	1	0	0	0	0	0	0	0	0	0	0	0	0	0	0	0	0	0
Lactobacillus_panis	0	0	0	0	0	0	0	0	0	0	1	0	0	0	0	0	0	0	0	0	0	0	0	0	0	0	0	0	0
Lactobacillus_salivarius	0	0	0	0	0	0	0	0	0	0	0	0	0	0	0	0	0	0	0	0	0	0	0	0	1	0	0	0	0
Lactobacillus_sanfranciscensis	0	0	0	0	0	0	0	0	0	0	0	0	0	0	0	0	0	0	0	0	0	0	0	0	1	0	0	0	0
Leuconostoc_pseudomesenteroides	0	0	0	0	0	0	0	0	0	0	1	0	0	0	0	0	0	0	0	0	0	0	0	0	0	0	0	0	0
Malikia_spinosa	0	0	0	0	0	1	0	0	0	0	0	0	0	0	0	0	0	0	0	0	0	0	0	0	0	0	0	0	0
Melittangium_lichenicola	0	0	0	0	0	0	0	0	0	0	0	1	0	0	0	0	0	0	0	0	0	0	0	0	0	0	0	0	0
Methylobacterium_organophilum	0	0	0	0	0	0	0	0	0	0	0	0	0	0	0	0	0	0	0	0	0	0	0	0	1	0	0	0	0
Methylophaga_nitratireducenticrescens	0	0	0	0	0	0	0	0	0	0	1	0	0	0	0	0	0	0	0	0	0	0	0	0	0	0	0	0	0
Microbacterium_aurum	0	0	0	0	0	0	0	0	0	0	1	0	0	0	0	0	0	0	0	0	0	0	0	0	0	0	0	0	0
Moraxella_ovis	0	0	0	0	0	0	0	0	0	0	0	1	0	0	0	0	0	0	0	0	0	0	0	0	0	0	0	0	0
Neisseria_cinerea	0	0	0	0	0	0	0	0	0	0	0	1	0	0	0	0	0	0	0	0	0	0	0	0	0	0	0	0	0
Neisseria_weaveri	0	0	0	0	0	0	0	0	0	0	0	1	0	0	0	0	0	0	0	0	0	0	0	0	0	0	0	0	0
Opitutus_terrae	0	0	0	0	0	0	0	0	0	0	0	0	0	0	0	0	0	0	0	0	1	0	0	0	0	0	0	0	0
Paeniglutamicibacter_antarcticus	0	0	0	0	0	0	0	0	0	0	1	0	0	0	0	0	0	0	0	0	0	0	0	0	0	0	0	0	0
Paracoccus_laeviglucosivorans	0	0	0	0	0	0	0	0	0	0	0	0	0	0	0	0	0	0	0	0	1	0	0	0	0	0	0	0	0
Peptostreptococcus_anaerobius	0	0	0	0	0	0	0	0	0	0	0	1	0	0	0	0	0	0	0	0	0	0	0	0	0	0	0	0	0
Planomicrobium_glaciei	0	0	0	0	0	0	0	0	0	0	0	1	0	0	0	0	0	0	0	0	0	0	0	0	0	0	0	0	0
Porphyromonas_pasteri	0	0	0	0	0	0	0	0	0	0	0	0	0	1	0	0	0	0	0	0	0	0	0	0	0	0	0	0	0
Prevotella_dentasini	0	0	0	0	0	0	0	0	0	0	0	1	0	0	0	0	0	0	0	0	0	0	0	0	0	0	0	0	0
Prevotellamassilia_timonensis	0	0	0	0	0	0	0	0	0	0	0	1	0	0	0	0	0	0	0	0	0	0	0	0	0	0	0	0	0
Pseudarthrobacter_chlorophenolicus	0	0	0	0	0	0	0	0	0	0	0	1	0	0	0	0	0	0	0	0	0	0	0	0	0	0	0	0	0
Pseudomonas_protegens	0	0	0	0	0	0	0	0	0	0	0	0	0	0	0	0	0	0	0	0	0	0	0	0	1	0	0	0	0
Qipengyuania_sediminis	0	0	0	0	0	0	0	0	0	0	0	0	0	0	0	0	0	0	0	0	1	0	0	0	0	0	0	0	0
Raoultella_ornithinolytica	0	0	0	0	0	0	0	0	0	0	1	0	0	0	0	0	0	0	0	0	0	0	0	0	0	0	0	0	0
Reyranella_massiliensis	0	0	0	0	0	0	0	0	0	0	0	0	0	0	0	0	0	0	0	0	0	1	0	0	0	0	0	0	0
Rhodoferax_saidenbachensis	0	1	0	0	0	0	0	0	0	0	0	0	0	0	0	0	0	0	0	0	0	0	0	0	0	0	0	0	0
Roseomonas_pecuniae	0	0	0	0	0	0	0	0	0	0	1	0	0	0	0	0	0	0	0	0	0	0	0	0	0	0	0	0	0
Roseovarius_antarcticus	0	0	0	0	0	0	0	0	0	0	0	0	0	0	0	0	0	0	0	1	0	0	0	0	0	0	0	0	0
Rubellimicrobium_mesophilum	0	0	0	0	0	0	0	1	0	0	0	0	0	0	0	0	0	0	0	0	0	0	0	0	0	0	0	0	0
Rubellimicrobium_roseum	0	0	0	0	0	0	0	0	0	0	0	0	0	0	0	0	0	0	0	0	0	1	0	0	0	0	0	0	0
Selenomonas_artemidis	0	0	0	0	0	0	0	0	0	0	0	0	0	0	0	0	0	0	0	0	0	1	0	0	0	0	0	0	0
Shigella_boydii	0	0	0	0	0	0	0	0	0	0	1	0	0	0	0	0	0	0	0	0	0	0	0	0	0	0	0	0	0
Shinella_zoogloeoides	0	0	0	0	0	0	0	0	0	0	0	1	0	0	0	0	0	0	0	0	0	0	0	0	0	0	0	0	0
Sphingobacterium_mizutaii	0	0	0	0	0	0	0	0	0	0	1	0	0	0	0	0	0	0	0	0	0	0	0	0	0	0	0	0	0
Sphingobacterium_multivorum	0	0	0	0	0	0	0	0	0	0	0	1	0	0	0	0	0	0	0	0	0	0	0	0	0	0	0	0	0
Sphingomonas_endophytica	0	0	0	0	0	0	0	0	0	0	0	1	0	0	0	0	0	0	0	0	0	0	0	0	0	0	0	0	0
Staphylococcus_haemolyticus	0	0	0	0	0	0	0	0	0	1	0	0	0	0	0	0	0	0	0	0	0	0	0	0	0	0	0	0	0
Staphylococcus_muscae	0	0	0	0	0	0	0	0	0	0	0	1	0	0	0	0	0	0	0	0	0	0	0	0	0	0	0	0	0
Staphylococcus_sciuri	0	0	0	0	0	0	0	0	0	0	0	1	0	0	0	0	0	0	0	0	0	0	0	0	0	0	0	0	0
Streptococcus_orisasini	0	0	0	0	0	0	0	0	0	0	0	1	0	0	0	0	0	0	0	0	0	0	0	0	0	0	0	0	0
Streptococcus_ovis	0	0	0	0	0	0	0	0	0	0	0	1	0	0	0	0	0	0	0	0	0	0	0	0	0	0	0	0	0
Tetragenococcus_halophilus	0	0	0	0	0	0	0	0	0	0	0	0	0	0	0	1	0	0	0	0	0	0	0	0	0	0	0	0	0
Weissella_viridescens	0	1	0	0	0	0	0	0	0	0	0	0	0	0	0	0	0	0	0	0	0	0	0	0	0	0	0	0	0
Abiotrophia_defectiva	0	0	0	0	0	0	0	0	0	0	0	0	0	0	0	0	0	0	0	0	0	0	0	0	0	0	0	0	0
Achromobacter_piechaudii	0	0	0	0	0	0	0	0	0	0	0	0	0	0	0	0	0	0	0	0	0	0	0	0	0	0	0	0	0
Acidibacter_ferrireducens	0	0	0	0	0	0	0	0	0	0	0	0	0	0	0	0	0	0	0	0	0	0	0	0	0	0	0	0	0
Aciditerrimonas_ferrireducens	0	0	0	0	0	0	0	0	0	0	0	0	0	0	0	0	0	0	0	0	0	0	0	0	0	0	0	0	0
Acidovorax_facilis	0	0	0	0	0	0	0	0	0	0	0	0	0	0	0	0	0	0	0	0	0	0	0	0	0	0	0	0	0
Acidovorax_temperans	0	0	0	0	0	0	0	0	0	0	0	0	0	0	0	0	0	0	0	0	0	0	0	0	0	0	0	0	0
Acidovorax_wohlfahrtii	0	0	0	0	0	0	0	0	0	0	0	0	0	0	0	0	0	0	0	0	0	0	0	0	0	0	0	0	0
Acinetobacter_marinus	0	0	0	0	0	0	0	0	0	0	0	0	0	0	0	0	0	0	0	0	0	0	0	0	0	0	0	0	0
Acinetobacter_rhizosphaerae	0	0	0	0	0	0	0	0	0	0	0	0	0	0	0	0	0	0	0	0	0	0	0	0	0	0	0	0	0
Acinetobacter_schindleri	0	0	0	0	0	0	0	0	0	0	0	0	0	0	0	0	0	0	0	0	0	0	0	0	0	0	0	0	0
Acinetobacter_soli	0	0	0	0	0	0	0	0	0	0	0	0	0	0	0	0	0	0	0	0	0	0	0	0	0	0	0	0	0
Actinomyces_georgiae	0	0	0	0	0	0	0	0	0	0	0	0	0	0	0	0	0	0	0	0	0	0	0	0	0	0	0	0	0
Actinomyces_odontolyticus	0	0	0	0	0	0	0	0	0	0	0	0	0	0	0	0	0	0	0	0	0	0	0	0	0	0	0	0	0
Aeromicrobium_flavum	0	0	0	0	0	0	0	0	0	0	0	0	0	0	0	0	0	0	0	0	0	0	0	0	0	0	0	0	0
Agrococcus_citreus	0	0	0	0	0	0	0	0	0	0	0	0	0	0	0	0	0	0	0	0	0	0	0	0	0	0	0	0	0
Alkanindiges_illinoisensis	0	0	0	0	0	0	0	0	0	0	0	0	0	0	0	0	0	0	0	0	0	0	0	0	0	0	0	0	0
Alloprevotella_tannerae	0	0	0	0	0	0	0	0	0	0	0	0	0	0	0	0	0	0	0	0	0	0	0	0	0	0	0	0	0
Altererythrobacter_palmitatis	0	0	0	0	0	0	0	0	0	0	0	0	0	0	0	0	0	0	0	0	0	0	0	0	0	0	0	0	0
Altererythrobacter_rigui	0	0	0	0	0	0	0	0	0	0	0	0	0	0	0	0	0	0	0	0	0	0	0	0	0	0	0	0	0
Altererythrobacter_soli	0	0	0	0	0	0	0	0	0	0	0	0	0	0	0	0	0	0	0	0	0	0	0	0	0	0	0	0	0
Altererythrobacter_troitsensis	0	0	0	0	0	0	0	0	0	0	0	0	0	0	0	0	0	0	0	0	0	0	0	0	0	0	0	0	0
Alysiella_crassa	0	0	0	0	0	0	0	0	0	0	0	0	0	0	0	0	0	0	0	0	0	0	0	0	0	0	0	0	0
Aminobacter_anthyllidis	0	0	0	0	0	0	0	0	0	0	0	0	0	0	0	0	0	0	0	0	0	0	0	0	0	0	0	0	0
Anaerococcus_hydrogenalis	0	0	0	0	0	0	0	0	0	0	0	0	0	0	0	0	0	0	0	0	0	0	0	0	0	0	0	0	0
Anaerococcus_octavius	0	0	0	0	0	0	0	0	0	0	0	0	0	0	0	0	0	0	0	0	0	0	0	0	0	0	0	0	0
Anaerococcus_prevotii	0	0	0	0	0	0	0	0	0	0	0	0	0	0	0	0	0	0	0	0	0	0	0	0	0	0	0	0	0
Anoxybacillus_flavithermus	0	0	0	0	0	0	0	0	0	0	0	0	0	0	0	0	0	0	0	0	0	0	0	0	0	0	0	0	0
Anoxybacillus_tepidamans	0	0	0	0	0	0	0	0	0	0	0	0	0	0	0	0	0	0	0	0	0	0	0	0	0	0	0	0	0
Aquabacterium_parvum	0	0	0	0	0	0	0	0	0	0	0	0	0	0	0	0	0	0	0	0	0	0	0	0	0	0	0	0	0
Aquihabitans_daechungensis	0	0	0	0	0	0	0	0	0	0	0	0	0	0	0	0	0	0	0	0	0	0	0	0	0	0	0	0	0
Arboricoccus_pini	0	0	0	0	0	0	0	0	0	0	0	0	0	0	0	0	0	0	0	0	0	0	0	0	0	0	0	0	0
Arenimonas_metalli	0	0	0	0	0	0	0	0	0	0	0	0	0	0	0	0	0	0	0	0	0	0	0	0	0	0	0	0	0
Arthrobacter_agilis	0	0	0	0	0	0	0	0	0	0	0	0	0	0	0	0	0	0	0	0	0	0	0	0	0	0	0	0	0
Arthrobacter_globiformis	0	0	0	0	0	0	0	0	0	0	0	0	0	0	0	0	0	0	0	0	0	0	0	0	0	0	0	0	0
Arthrobacter_mysorens	0	0	0	0	0	0	0	0	0	0	0	0	0	0	0	0	0	0	0	0	0	0	0	0	0	0	0	0	0
Arthrobacter_psychrolactophilus	0	0	0	0	0	0	0	0	0	0	0	0	0	0	0	0	0	0	0	0	0	0	0	0	0	0	0	0	0
Asticcacaulis_excentricus	0	0	0	0	0	0	0	0	0	0	0	0	0	0	0	0	0	0	0	0	0	0	0	0	0	0	0	0	0
Atopostipes_suicloacalis	0	0	0	0	0	0	0	0	0	0	0	0	0	0	0	0	0	0	0	0	0	0	0	0	0	0	0	0	0
Auricoccus_indicus	0	0	0	0	0	0	0	0	0	0	0	0	0	0	0	0	0	0	0	0	0	0	0	0	0	0	0	0	0
Azospirillum_agricola	0	0	0	0	0	0	0	0	0	0	0	0	0	0	0	0	0	0	0	0	0	0	0	0	0	0	0	0	0
Bacillus_beringensis	0	0	0	0	0	0	0	0	0	0	0	0	0	0	0	0	0	0	0	0	0	0	0	0	0	0	0	0	0
Bacillus_firmus	0	0	0	0	0	0	0	0	0	0	0	0	0	0	0	0	0	0	0	0	0	0	0	0	0	0	0	0	0
Bacillus_flexus	0	0	0	0	0	0	0	0	0	0	0	0	0	0	0	0	0	0	0	0	0	0	0	0	0	0	0	0	0
Bacillus_humi	0	0	0	0	0	0	0	0	0	0	0	0	0	0	0	0	0	0	0	0	0	0	0	0	0	0	0	0	0
Bacillus_isronensis	0	0	0	0	0	0	0	0	0	0	0	0	0	0	0	0	0	0	0	0	0	0	0	0	0	0	0	0	0
Bacillus_macyae	0	0	0	0	0	0	0	0	0	0	0	0	0	0	0	0	0	0	0	0	0	0	0	0	0	0	0	0	0
Bacillus_psychrotolerans	0	0	0	0	0	0	0	0	0	0	0	0	0	0	0	0	0	0	0	0	0	0	0	0	0	0	0	0	0
Bacteroides_uniformis	0	0	0	0	0	0	0	0	0	0	0	0	0	0	0	0	0	0	0	0	0	0	0	0	0	0	0	0	0
Bergeyella_zoohelcum	0	0	0	0	0	0	0	0	0	0	0	0	0	0	0	0	0	0	0	0	0	0	0	0	0	0	0	0	0
Bosea_massiliensis	0	0	0	0	0	0	0	0	0	0	0	0	0	0	0	0	0	0	0	0	0	0	0	0	0	0	0	0	0
Brachybacterium_muris	0	0	0	0	0	0	0	0	0	0	0	0	0	0	0	0	0	0	0	0	0	0	0	0	0	0	0	0	0
Brachybacterium_paraconglomeratum	0	0	0	0	0	0	0	0	0	0	0	0	0	0	0	0	0	0	0	0	0	0	0	0	0	0	0	0	0
Brachymonas_chironomi	0	0	0	0	0	0	0	0	0	0	0	0	0	0	0	0	0	0	0	0	0	0	0	0	0	0	0	0	0
Brevibacillus_fluminis	0	0	0	0	0	0	0	0	0	0	0	0	0	0	0	0	0	0	0	0	0	0	0	0	0	0	0	0	0
Brevibacterium_pityocampae	0	0	0	0	0	0	0	0	0	0	0	0	0	0	0	0	0	0	0	0	0	0	0	0	0	0	0	0	0
Brevibacterium_sanguinis	0	0	0	0	0	0	0	0	0	0	0	0	0	0	0	0	0	0	0	0	0	0	0	0	0	0	0	0	0
Brevundimonas_aveniformis	0	0	0	0	0	0	0	0	0	0	0	0	0	0	0	0	0	0	0	0	0	0	0	0	0	0	0	0	0
Brevundimonas_variabilis	0	0	0	0	0	0	0	0	0	0	0	0	0	0	0	0	0	0	0	0	0	0	0	0	0	0	0	0	0
Brevundimonas_vesicularis	0	0	0	0	0	0	0	0	0	0	0	0	0	0	0	0	0	0	0	0	0	0	0	0	0	0	0	0	0
Burkholderia_contaminans	0	0	0	0	0	0	0	0	0	0	0	0	0	0	0	0	0	0	0	0	0	0	0	0	0	0	0	0	0
Burkholderia_lata	0	0	0	0	0	0	0	0	0	0	0	0	0	0	0	0	0	0	0	0	0	0	0	0	0	0	0	0	0
Caballeronia_sordidicola	0	0	0	0	0	0	0	0	0	0	0	0	0	0	0	0	0	0	0	0	0	0	0	0	0	0	0	0	0
Caedibacter_caryophilus	0	0	0	0	0	0	0	0	0	0	0	0	0	0	0	0	0	0	0	0	0	0	0	0	0	0	0	0	0
Capnocytophaga_granulosa	0	0	0	0	0	0	0	0	0	0	0	0	0	0	0	0	0	0	0	0	0	0	0	0	0	0	0	0	0
Capnocytophaga_sputigena	0	0	0	0	0	0	0	0	0	0	0	0	0	0	0	0	0	0	0	0	0	0	0	0	0	0	0	0	0
Carnobacterium_maltaromaticum	0	0	0	0	0	0	0	0	0	0	0	0	0	0	0	0	0	0	0	0	0	0	0	0	0	0	0	0	0
Carnobacterium_viridans	0	0	0	0	0	0	0	0	0	0	0	0	0	0	0	0	0	0	0	0	0	0	0	0	0	0	0	0	0
Caulobacter_henricii	0	0	0	0	0	0	0	0	0	0	0	0	0	0	0	0	0	0	0	0	0	0	0	0	0	0	0	0	0
Caulobacter_rhizosphaerae	0	0	0	0	0	0	0	0	0	0	0	0	0	0	0	0	0	0	0	0	0	0	0	0	0	0	0	0	0
Cecembia_lonarensis	0	0	0	0	0	0	0	0	0	0	0	0	0	0	0	0	0	0	0	0	0	0	0	0	0	0	0	0	0
Cellvibrio_gandavensis	0	0	0	0	0	0	0	0	0	0	0	0	0	0	0	0	0	0	0	0	0	0	0	0	0	0	0	0	0
Cereibacter_changlensis	0	0	0	0	0	0	0	0	0	0	0	0	0	0	0	0	0	0	0	0	0	0	0	0	0	0	0	0	0
Chryseobacterium_hominis	0	0	0	0	0	0	0	0	0	0	0	0	0	0	0	0	0	0	0	0	0	0	0	0	0	0	0	0	0
Chryseolinea_serpens	0	0	0	0	0	0	0	0	0	0	0	0	0	0	0	0	0	0	0	0	0	0	0	0	0	0	0	0	0
Chryseomicrobium_amylolyticum	0	0	0	0	0	0	0	0	0	0	0	0	0	0	0	0	0	0	0	0	0	0	0	0	0	0	0	0	0
Cloacibacterium_haliotis	0	0	0	0	0	0	0	0	0	0	0	0	0	0	0	0	0	0	0	0	0	0	0	0	0	0	0	0	0
Clostridium_chromiireducens	0	0	0	0	0	0	0	0	0	0	0	0	0	0	0	0	0	0	0	0	0	0	0	0	0	0	0	0	0
Clostridium_disporicum	0	0	0	0	0	0	0	0	0	0	0	0	0	0	0	0	0	0	0	0	0	0	0	0	0	0	0	0	0
Clostridium_lactatifermentans	0	0	0	0	0	0	0	0	0	0	0	0	0	0	0	0	0	0	0	0	0	0	0	0	0	0	0	0	0
Clostridium_swellfunianum	0	0	0	0	0	0	0	0	0	0	0	0	0	0	0	0	0	0	0	0	0	0	0	0	0	0	0	0	0
Cnuella_takakiae	0	0	0	0	0	0	0	0	0	0	0	0	0	0	0	0	0	0	0	0	0	0	0	0	0	0	0	0	0
Corynebacterium_glucuronolyticum	0	0	0	0	0	0	0	0	0	0	0	0	0	0	0	0	0	0	0	0	0	0	0	0	0	0	0	0	0
Corynebacterium_stationis	0	0	0	0	0	0	0	0	0	0	0	0	0	0	0	0	0	0	0	0	0	0	0	0	0	0	0	0	0
Corynebacterium_tuberculostearicum	0	0	0	0	0	0	0	0	0	0	0	0	0	0	0	0	0	0	0	0	0	0	0	0	0	0	0	0	0
Corynebacterium_variabile	0	0	0	0	0	0	0	0	0	0	0	0	0	0	0	0	0	0	0	0	0	0	0	0	0	0	0	0	0
Craurococcus_roseus	0	0	0	0	0	0	0	0	0	0	0	0	0	0	0	0	0	0	0	0	0	0	0	0	0	0	0	0	0
Croceicoccus_pelagius	0	0	0	0	0	0	0	0	0	0	0	0	0	0	0	0	0	0	0	0	0	0	0	0	0	0	0	0	0
Deinococcus_budaensis	0	0	0	0	0	0	0	0	0	0	0	0	0	0	0	0	0	0	0	0	0	0	0	0	0	0	0	0	0
Deinococcus_caeni	0	0	0	0	0	0	0	0	0	0	0	0	0	0	0	0	0	0	0	0	0	0	0	0	0	0	0	0	0
Deinococcus_murrayi	0	0	0	0	0	0	0	0	0	0	0	0	0	0	0	0	0	0	0	0	0	0	0	0	0	0	0	0	0
Deinococcus_proteolyticus	0	0	0	0	0	0	0	0	0	0	0	0	0	0	0	0	0	0	0	0	0	0	0	0	0	0	0	0	0
Deinococcus_reticulitermitis	0	0	0	0	0	0	0	0	0	0	0	0	0	0	0	0	0	0	0	0	0	0	0	0	0	0	0	0	0
Dermacoccus_nishinomiyaensis	0	0	0	0	0	0	0	0	0	0	0	0	0	0	0	0	0	0	0	0	0	0	0	0	0	0	0	0	0
Desemzia_incerta	0	0	0	0	0	0	0	0	0	0	0	0	0	0	0	0	0	0	0	0	0	0	0	0	0	0	0	0	0
Devosia_psychrophila	0	0	0	0	0	0	0	0	0	0	0	0	0	0	0	0	0	0	0	0	0	0	0	0	0	0	0	0	0
Dietzia_schimae	0	0	0	0	0	0	0	0	0	0	0	0	0	0	0	0	0	0	0	0	0	0	0	0	0	0	0	0	0
Edaphobacter_modestum	0	0	0	0	0	0	0	0	0	0	0	0	0	0	0	0	0	0	0	0	0	0	0	0	0	0	0	0	0
Edaphobaculum_flavum	0	0	0	0	0	0	0	0	0	0	0	0	0	0	0	0	0	0	0	0	0	0	0	0	0	0	0	0	0
Empedobacter_brevis	0	0	0	0	0	0	0	0	0	0	0	0	0	0	0	0	0	0	0	0	0	0	0	0	0	0	0	0	0
Ensifer_adhaerens	0	0	0	0	0	0	0	0	0	0	0	0	0	0	0	0	0	0	0	0	0	0	0	0	0	0	0	0	0
Enterococcus_avium	0	0	0	0	0	0	0	0	0	0	0	0	0	0	0	0	0	0	0	0	0	0	0	0	0	0	0	0	0
Enterococcus_mundtii	0	0	0	0	0	0	0	0	0	0	0	0	0	0	0	0	0	0	0	0	0	0	0	0	0	0	0	0	0
Eubacterium_coprostanoligenes	0	0	0	0	0	0	0	0	0	0	0	0	0	0	0	0	0	0	0	0	0	0	0	0	0	0	0	0	0
Eubacterium_moniliforme	0	0	0	0	0	0	0	0	0	0	0	0	0	0	0	0	0	0	0	0	0	0	0	0	0	0	0	0	0
Eubacterium_rectale	0	0	0	0	0	0	0	0	0	0	0	0	0	0	0	0	0	0	0	0	0	0	0	0	0	0	0	0	0
Ewingella_americana	0	0	0	0	0	0	0	0	0	0	0	0	0	0	0	0	0	0	0	0	0	0	0	0	0	0	0	0	0
Facklamia_tabacinasalis	0	0	0	0	0	0	0	0	0	0	0	0	0	0	0	0	0	0	0	0	0	0	0	0	0	0	0	0	0
Falsirhodobacter_halotolerans	0	0	0	0	0	0	0	0	0	0	0	0	0	0	0	0	0	0	0	0	0	0	0	0	0	0	0	0	0
Fenollaria_massiliensis	0	0	0	0	0	0	0	0	0	0	0	0	0	0	0	0	0	0	0	0	0	0	0	0	0	0	0	0	0
Fimbriiglobus_ruber	0	0	0	0	0	0	0	0	0	0	0	0	0	0	0	0	0	0	0	0	0	0	0	0	0	0	0	0	0
Flaviaesturariibacter_luteus	0	0	0	0	0	0	0	0	0	0	0	0	0	0	0	0	0	0	0	0	0	0	0	0	0	0	0	0	0
Flavisolibacter_ginsengiterrae	0	0	0	0	0	0	0	0	0	0	0	0	0	0	0	0	0	0	0	0	0	0	0	0	0	0	0	0	0
Flavobacterium_degerlachei	0	0	0	0	0	0	0	0	0	0	0	0	0	0	0	0	0	0	0	0	0	0	0	0	0	0	0	0	0
Flavobacterium_glaciei	0	0	0	0	0	0	0	0	0	0	0	0	0	0	0	0	0	0	0	0	0	0	0	0	0	0	0	0	0
Flavobacterium_piscis	0	0	0	0	0	0	0	0	0	0	0	0	0	0	0	0	0	0	0	0	0	0	0	0	0	0	0	0	0
Flavobacterium_qiangtangense	0	0	0	0	0	0	0	0	0	0	0	0	0	0	0	0	0	0	0	0	0	0	0	0	0	0	0	0	0
Flavobacterium_suzhouense	0	0	0	0	0	0	0	0	0	0	0	0	0	0	0	0	0	0	0	0	0	0	0	0	0	0	0	0	0
Flavobacterium_ummariense	0	0	0	0	0	0	0	0	0	0	0	0	0	0	0	0	0	0	0	0	0	0	0	0	0	0	0	0	0
Flectobacillus_fontis	0	0	0	0	0	0	0	0	0	0	0	0	0	0	0	0	0	0	0	0	0	0	0	0	0	0	0	0	0
Fluviicola_hefeinensis	0	0	0	0	0	0	0	0	0	0	0	0	0	0	0	0	0	0	0	0	0	0	0	0	0	0	0	0	0
Fusobacterium_gastrosuis	0	0	0	0	0	0	0	0	0	0	0	0	0	0	0	0	0	0	0	0	0	0	0	0	0	0	0	0	0
Fusobacterium_varium	0	0	0	0	0	0	0	0	0	0	0	0	0	0	0	0	0	0	0	0	0	0	0	0	0	0	0	0	0
Gaiella_occulta	0	0	0	0	0	0	0	0	0	0	0	0	0	0	0	0	0	0	0	0	0	0	0	0	0	0	0	0	0
Gemella_haemolysans	0	0	0	0	0	0	0	0	0	0	0	0	0	0	0	0	0	0	0	0	0	0	0	0	0	0	0	0	0
Gemmobacter_intermedius	0	0	0	0	0	0	0	0	0	0	0	0	0	0	0	0	0	0	0	0	0	0	0	0	0	0	0	0	0
Geobacillus_stearothermophilus	0	0	0	0	0	0	0	0	0	0	0	0	0	0	0	0	0	0	0	0	0	0	0	0	0	0	0	0	0
Geodermatophilus_obscurus	0	0	0	0	0	0	0	0	0	0	0	0	0	0	0	0	0	0	0	0	0	0	0	0	0	0	0	0	0
Gilliamella_apicola	0	0	0	0	0	0	0	0	0	0	0	0	0	0	0	0	0	0	0	0	0	0	0	0	0	0	0	0	0
Gordonia_terrae	0	0	0	0	0	0	0	0	0	0	0	0	0	0	0	0	0	0	0	0	0	0	0	0	0	0	0	0	0
Gracilibacillus_thailandensis	0	0	0	0	0	0	0	0	0	0	0	0	0	0	0	0	0	0	0	0	0	0	0	0	0	0	0	0	0
Haemophilus_haemolyticus	0	0	0	0	0	0	0	0	0	0	0	0	0	0	0	0	0	0	0	0	0	0	0	0	0	0	0	0	0
Haemophilus_parainfluenzae	0	0	0	0	0	0	0	0	0	0	0	0	0	0	0	0	0	0	0	0	0	0	0	0	0	0	0	0	0
Haemophilus_paraphrohaemolyticus	0	0	0	0	0	0	0	0	0	0	0	0	0	0	0	0	0	0	0	0	0	0	0	0	0	0	0	0	0
Hahella_antarctica	0	0	0	0	0	0	0	0	0	0	0	0	0	0	0	0	0	0	0	0	0	0	0	0	0	0	0	0	0
Halomonas_desiderata	0	0	0	0	0	0	0	0	0	0	0	0	0	0	0	0	0	0	0	0	0	0	0	0	0	0	0	0	0
Hydrogenophaga_flava	0	0	0	0	0	0	0	0	0	0	0	0	0	0	0	0	0	0	0	0	0	0	0	0	0	0	0	0	0
Hyphomicrobium_vulgare	0	0	0	0	0	0	0	0	0	0	0	0	0	0	0	0	0	0	0	0	0	0	0	0	0	0	0	0	0
Janibacter_anophelis	0	0	0	0	0	0	0	0	0	0	0	0	0	0	0	0	0	0	0	0	0	0	0	0	0	0	0	0	0
Janibacter_limosus	0	0	0	0	0	0	0	0	0	0	0	0	0	0	0	0	0	0	0	0	0	0	0	0	0	0	0	0	0
Janthinobacterium_lividum	0	0	0	0	0	0	0	0	0	0	0	0	0	0	0	0	0	0	0	0	0	0	0	0	0	0	0	0	0
Jeotgalicoccus_huakuii	0	0	0	0	0	0	0	0	0	0	0	0	0	0	0	0	0	0	0	0	0	0	0	0	0	0	0	0	0
Kallipyga_massiliensis	0	0	0	0	0	0	0	0	0	0	0	0	0	0	0	0	0	0	0	0	0	0	0	0	0	0	0	0	0
Kineosporia_rhamnosa	0	0	0	0	0	0	0	0	0	0	0	0	0	0	0	0	0	0	0	0	0	0	0	0	0	0	0	0	0
Klebsiella_quasipneumoniae	0	0	0	0	0	0	0	0	0	0	0	0	0	0	0	0	0	0	0	0	0	0	0	0	0	0	0	0	0
Kocuria_palustris	0	0	0	0	0	0	0	0	0	0	0	0	0	0	0	0	0	0	0	0	0	0	0	0	0	0	0	0	0
Lachnoanaerobaculum_umeaense	0	0	0	0	0	0	0	0	0	0	0	0	0	0	0	0	0	0	0	0	0	0	0	0	0	0	0	0	0
Lactobacillus_buchneri	0	0	0	0	0	0	0	0	0	0	0	0	0	0	0	0	0	0	0	0	0	0	0	0	0	0	0	0	0
Lactobacillus_coleohominis	0	0	0	0	0	0	0	0	0	0	0	0	0	0	0	0	0	0	0	0	0	0	0	0	0	0	0	0	0
Lactobacillus_equi	0	0	0	0	0	0	0	0	0	0	0	0	0	0	0	0	0	0	0	0	0	0	0	0	0	0	0	0	0
Lactobacillus_iners	0	0	0	0	0	0	0	0	0	0	0	0	0	0	0	0	0	0	0	0	0	0	0	0	0	0	0	0	0
Lactobacillus_mucosae	0	0	0	0	0	0	0	0	0	0	0	0	0	0	0	0	0	0	0	0	0	0	0	0	0	0	0	0	0
Lactobacillus_paraplantarum	0	0	0	0	0	0	0	0	0	0	0	0	0	0	0	0	0	0	0	0	0	0	0	0	0	0	0	0	0
Lactobacillus_pentosus	0	0	0	0	0	0	0	0	0	0	0	0	0	0	0	0	0	0	0	0	0	0	0	0	0	0	0	0	0
Lautropia_mirabilis	0	0	0	0	0	0	0	0	0	0	0	0	0	0	0	0	0	0	0	0	0	0	0	0	0	0	0	0	0
Lawsonella_clevelandensis	0	0	0	0	0	0	0	0	0	0	0	0	0	0	0	0	0	0	0	0	0	0	0	0	0	0	0	0	0
Lentibacillus_sediminis	0	0	0	0	0	0	0	0	0	0	0	0	0	0	0	0	0	0	0	0	0	0	0	0	0	0	0	0	0
Leptotrichia_shahii	0	0	0	0	0	0	0	0	0	0	0	0	0	0	0	0	0	0	0	0	0	0	0	0	0	0	0	0	0
Leptotrichia_wadei	0	0	0	0	0	0	0	0	0	0	0	0	0	0	0	0	0	0	0	0	0	0	0	0	0	0	0	0	0
Luteibacter_rhizovicinus	0	0	0	0	0	0	0	0	0	0	0	0	0	0	0	0	0	0	0	0	0	0	0	0	0	0	0	0	0
Luteimonas_composti	0	0	0	0	0	0	0	0	0	0	0	0	0	0	0	0	0	0	0	0	0	0	0	0	0	0	0	0	0
Luteitalea_pratensis	0	0	0	0	0	0	0	0	0	0	0	0	0	0	0	0	0	0	0	0	0	0	0	0	0	0	0	0	0
Luteolibacter_gellanilyticus	0	0	0	0	0	0	0	0	0	0	0	0	0	0	0	0	0	0	0	0	0	0	0	0	0	0	0	0	0
Lysobacter_arseniciresistens	0	0	0	0	0	0	0	0	0	0	0	0	0	0	0	0	0	0	0	0	0	0	0	0	0	0	0	0	0
Lysobacter_capsici	0	0	0	0	0	0	0	0	0	0	0	0	0	0	0	0	0	0	0	0	0	0	0	0	0	0	0	0	0
Lysobacter_dokdonensis	0	0	0	0	0	0	0	0	0	0	0	0	0	0	0	0	0	0	0	0	0	0	0	0	0	0	0	0	0
Lysobacter_humi	0	0	0	0	0	0	0	0	0	0	0	0	0	0	0	0	0	0	0	0	0	0	0	0	0	0	0	0	0
Lysobacter_spongiicola	0	0	0	0	0	0	0	0	0	0	0	0	0	0	0	0	0	0	0	0	0	0	0	0	0	0	0	0	0
Macellibacteroides_fermentans	0	0	0	0	0	0	0	0	0	0	0	0	0	0	0	0	0	0	0	0	0	0	0	0	0	0	0	0	0
Macrococcus_goetzii	0	0	0	0	0	0	0	0	0	0	0	0	0	0	0	0	0	0	0	0	0	0	0	0	0	0	0	0	0
Massilia_agri	0	0	0	0	0	0	0	0	0	0	0	0	0	0	0	0	0	0	0	0	0	0	0	0	0	0	0	0	0
Massilia_albidiflava	0	0	0	0	0	0	0	0	0	0	0	0	0	0	0	0	0	0	0	0	0	0	0	0	0	0	0	0	0
Massilia_alkalitolerans	0	0	0	0	0	0	0	0	0	0	0	0	0	0	0	0	0	0	0	0	0	0	0	0	0	0	0	0	0
Massilia_arvi	0	0	0	0	0	0	0	0	0	0	0	0	0	0	0	0	0	0	0	0	0	0	0	0	0	0	0	0	0
Massilia_haematophila	0	0	0	0	0	0	0	0	0	0	0	0	0	0	0	0	0	0	0	0	0	0	0	0	0	0	0	0	0
Massilia_yuzhufengensis	0	0	0	0	0	0	0	0	0	0	0	0	0	0	0	0	0	0	0	0	0	0	0	0	0	0	0	0	0
Meiothermus_silvanus	0	0	0	0	0	0	0	0	0	0	0	0	0	0	0	0	0	0	0	0	0	0	0	0	0	0	0	0	0
Membranicola_marinus	0	0	0	0	0	0	0	0	0	0	0	0	0	0	0	0	0	0	0	0	0	0	0	0	0	0	0	0	0
Metaprevotella_massiliensis	0	0	0	0	0	0	0	0	0	0	0	0	0	0	0	0	0	0	0	0	0	0	0	0	0	0	0	0	0
Methylobacterium_aminovorans	0	0	0	0	0	0	0	0	0	0	0	0	0	0	0	0	0	0	0	0	0	0	0	0	0	0	0	0	0
Methylobacterium_dankookense	0	0	0	0	0	0	0	0	0	0	0	0	0	0	0	0	0	0	0	0	0	0	0	0	0	0	0	0	0
Methylobacterium_jeotgali	0	0	0	0	0	0	0	0	0	0	0	0	0	0	0	0	0	0	0	0	0	0	0	0	0	0	0	0	0
Methylobacterium_mesophilicum	0	0	0	0	0	0	0	0	0	0	0	0	0	0	0	0	0	0	0	0	0	0	0	0	0	0	0	0	0
Methylorubrum_extorquens	0	0	0	0	0	0	0	0	0	0	0	0	0	0	0	0	0	0	0	0	0	0	0	0	0	0	0	0	0
Methylorubrum_rhodesianum	0	0	0	0	0	0	0	0	0	0	0	0	0	0	0	0	0	0	0	0	0	0	0	0	0	0	0	0	0
Microbacterium_proteolyticum	0	0	0	0	0	0	0	0	0	0	0	0	0	0	0	0	0	0	0	0	0	0	0	0	0	0	0	0	0
Microbispora_rosea	0	0	0	0	0	0	0	0	0	0	0	0	0	0	0	0	0	0	0	0	0	0	0	0	0	0	0	0	0
Micrococcus_endophyticus	0	0	0	0	0	0	0	0	0	0	0	0	0	0	0	0	0	0	0	0	0	0	0	0	0	0	0	0	0
Mobilicoccus_pelagius	0	0	0	0	0	0	0	0	0	0	0	0	0	0	0	0	0	0	0	0	0	0	0	0	0	0	0	0	0
Mongoliitalea_lutea	0	0	0	0	0	0	0	0	0	0	0	0	0	0	0	0	0	0	0	0	0	0	0	0	0	0	0	0	0
Moraxella_lacunata	0	0	0	0	0	0	0	0	0	0	0	0	0	0	0	0	0	0	0	0	0	0	0	0	0	0	0	0	0
Mucilaginibacter_gossypiicola	0	0	0	0	0	0	0	0	0	0	0	0	0	0	0	0	0	0	0	0	0	0	0	0	0	0	0	0	0
Mucilaginibacter_rubeus	0	0	0	0	0	0	0	0	0	0	0	0	0	0	0	0	0	0	0	0	0	0	0	0	0	0	0	0	0
Negativicoccus_massiliensis	0	0	0	0	0	0	0	0	0	0	0	0	0	0	0	0	0	0	0	0	0	0	0	0	0	0	0	0	0
Negativicoccus_succinicivorans	0	0	0	0	0	0	0	0	0	0	0	0	0	0	0	0	0	0	0	0	0	0	0	0	0	0	0	0	0
Neisseria_elongata	0	0	0	0	0	0	0	0	0	0	0	0	0	0	0	0	0	0	0	0	0	0	0	0	0	0	0	0	0
Neisseria_mucosa	0	0	0	0	0	0	0	0	0	0	0	0	0	0	0	0	0	0	0	0	0	0	0	0	0	0	0	0	0
Nicoletella_semolina	0	0	0	0	0	0	0	0	0	0	0	0	0	0	0	0	0	0	0	0	0	0	0	0	0	0	0	0	0
Nitrolancea_hollandica	0	0	0	0	0	0	0	0	0	0	0	0	0	0	0	0	0	0	0	0	0	0	0	0	0	0	0	0	0
Nocardioides_ganghwensis	0	0	0	0	0	0	0	0	0	0	0	0	0	0	0	0	0	0	0	0	0	0	0	0	0	0	0	0	0
Nocardioides_marinus	0	0	0	0	0	0	0	0	0	0	0	0	0	0	0	0	0	0	0	0	0	0	0	0	0	0	0	0	0
Nocardioides_solisilvae	0	0	0	0	0	0	0	0	0	0	0	0	0	0	0	0	0	0	0	0	0	0	0	0	0	0	0	0	0
Nordella_oligomobilis	0	0	0	0	0	0	0	0	0	0	0	0	0	0	0	0	0	0	0	0	0	0	0	0	0	0	0	0	0
Noviherbaspirillum_suwonense	0	0	0	0	0	0	0	0	0	0	0	0	0	0	0	0	0	0	0	0	0	0	0	0	0	0	0	0	0
Novosphingobium_aromaticivorans	0	0	0	0	0	0	0	0	0	0	0	0	0	0	0	0	0	0	0	0	0	0	0	0	0	0	0	0	0
Novosphingobium_fluoreni	0	0	0	0	0	0	0	0	0	0	0	0	0	0	0	0	0	0	0	0	0	0	0	0	0	0	0	0	0
Novosphingobium_gossypii	0	0	0	0	0	0	0	0	0	0	0	0	0	0	0	0	0	0	0	0	0	0	0	0	0	0	0	0	0
Novosphingobium_resinovorum	0	0	0	0	0	0	0	0	0	0	0	0	0	0	0	0	0	0	0	0	0	0	0	0	0	0	0	0	0
Oceanobacillus_picturae	0	0	0	0	0	0	0	0	0	0	0	0	0	0	0	0	0	0	0	0	0	0	0	0	0	0	0	0	0
Ochrobactrum_haematophilum	0	0	0	0	0	0	0	0	0	0	0	0	0	0	0	0	0	0	0	0	0	0	0	0	0	0	0	0	0
Ochrobactrum_intermedium	0	0	0	0	0	0	0	0	0	0	0	0	0	0	0	0	0	0	0	0	0	0	0	0	0	0	0	0	0
Ornithinimicrobium_flavum	0	0	0	0	0	0	0	0	0	0	0	0	0	0	0	0	0	0	0	0	0	0	0	0	0	0	0	0	0
Ottowia_beijingensis	0	0	0	0	0	0	0	0	0	0	0	0	0	0	0	0	0	0	0	0	0	0	0	0	0	0	0	0	0
Paenibacillus_koleovorans	0	0	0	0	0	0	0	0	0	0	0	0	0	0	0	0	0	0	0	0	0	0	0	0	0	0	0	0	0
Paenibacillus_wynnii	0	0	0	0	0	0	0	0	0	0	0	0	0	0	0	0	0	0	0	0	0	0	0	0	0	0	0	0	0
Paludibaculum_fermentans	0	0	0	0	0	0	0	0	0	0	0	0	0	0	0	0	0	0	0	0	0	0	0	0	0	0	0	0	0
Pantoea_coffeiphila	0	0	0	0	0	0	0	0	0	0	0	0	0	0	0	0	0	0	0	0	0	0	0	0	0	0	0	0	0
Paracoccus_acridae	0	0	0	0	0	0	0	0	0	0	0	0	0	0	0	0	0	0	0	0	0	0	0	0	0	0	0	0	0
Paracoccus_kocurii	0	0	0	0	0	0	0	0	0	0	0	0	0	0	0	0	0	0	0	0	0	0	0	0	0	0	0	0	0
Paracoccus_marinus	0	0	0	0	0	0	0	0	0	0	0	0	0	0	0	0	0	0	0	0	0	0	0	0	0	0	0	0	0
Parviterribacter_kavangonensis	0	0	0	0	0	0	0	0	0	0	0	0	0	0	0	0	0	0	0	0	0	0	0	0	0	0	0	0	0
Pedobacter_cryoconitis	0	0	0	0	0	0	0	0	0	0	0	0	0	0	0	0	0	0	0	0	0	0	0	0	0	0	0	0	0
Pedobacter_nyackensis	0	0	0	0	0	0	0	0	0	0	0	0	0	0	0	0	0	0	0	0	0	0	0	0	0	0	0	0	0
Pelomonas_saccharophila	0	0	0	0	0	0	0	0	0	0	0	0	0	0	0	0	0	0	0	0	0	0	0	0	0	0	0	0	0
Peptoniphilus_coxii	0	0	0	0	0	0	0	0	0	0	0	0	0	0	0	0	0	0	0	0	0	0	0	0	0	0	0	0	0
Peptoniphilus_koenoeneniae	0	0	0	0	0	0	0	0	0	0	0	0	0	0	0	0	0	0	0	0	0	0	0	0	0	0	0	0	0
Phenylobacterium_haematophilum	0	0	0	0	0	0	0	0	0	0	0	0	0	0	0	0	0	0	0	0	0	0	0	0	0	0	0	0	0
Pinus_koraiensis	0	0	0	0	0	0	0	0	0	0	0	0	0	0	0	0	0	0	0	0	0	0	0	0	0	0	0	0	0
Planifilum_fimeticola	0	0	0	0	0	0	0	0	0	0	0	0	0	0	0	0	0	0	0	0	0	0	0	0	0	0	0	0	0
Planobacterium_taklimakanense	0	0	0	0	0	0	0	0	0	0	0	0	0	0	0	0	0	0	0	0	0	0	0	0	0	0	0	0	0
Polaromonas_naphthalenivorans	0	0	0	0	0	0	0	0	0	0	0	0	0	0	0	0	0	0	0	0	0	0	0	0	0	0	0	0	0
Polymorphobacter_fuscus	0	0	0	0	0	0	0	0	0	0	0	0	0	0	0	0	0	0	0	0	0	0	0	0	0	0	0	0	0
Porphyromonas_catoniae	0	0	0	0	0	0	0	0	0	0	0	0	0	0	0	0	0	0	0	0	0	0	0	0	0	0	0	0	0
Prevotella_melaninogenica	0	0	0	0	0	0	0	0	0	0	0	0	0	0	0	0	0	0	0	0	0	0	0	0	0	0	0	0	0
Proteiniclasticum_ruminis	0	0	0	0	0	0	0	0	0	0	0	0	0	0	0	0	0	0	0	0	0	0	0	0	0	0	0	0	0
Pseudoclavibacter_helvolus	0	0	0	0	0	0	0	0	0	0	0	0	0	0	0	0	0	0	0	0	0	0	0	0	0	0	0	0	0
Pseudomonas_knackmussii	0	0	0	0	0	0	0	0	0	0	0	0	0	0	0	0	0	0	0	0	0	0	0	0	0	0	0	0	0
Pseudomonas_luteola	0	0	0	0	0	0	0	0	0	0	0	0	0	0	0	0	0	0	0	0	0	0	0	0	0	0	0	0	0
Pseudomonas_oryzihabitans	0	0	0	0	0	0	0	0	0	0	0	0	0	0	0	0	0	0	0	0	0	0	0	0	0	0	0	0	0
Pseudorhodoplanes_sinuspersici	0	0	0	0	0	0	0	0	0	0	0	0	0	0	0	0	0	0	0	0	0	0	0	0	0	0	0	0	0
Pseudoxanthomonas_spadix	0	0	0	0	0	0	0	0	0	0	0	0	0	0	0	0	0	0	0	0	0	0	0	0	0	0	0	0	0
Psychrobacillus_psychrodurans	0	0	0	0	0	0	0	0	0	0	0	0	0	0	0	0	0	0	0	0	0	0	0	0	0	0	0	0	0
Psychrobacter_sanguinis	0	0	0	0	0	0	0	0	0	0	0	0	0	0	0	0	0	0	0	0	0	0	0	0	0	0	0	0	0
Ramlibacter_ginsenosidimutans	0	0	0	0	0	0	0	0	0	0	0	0	0	0	0	0	0	0	0	0	0	0	0	0	0	0	0	0	0
Rehaibacterium_terrae	0	0	0	0	0	0	0	0	0	0	0	0	0	0	0	0	0	0	0	0	0	0	0	0	0	0	0	0	0
Rhizobium_alvei	0	0	0	0	0	0	0	0	0	0	0	0	0	0	0	0	0	0	0	0	0	0	0	0	0	0	0	0	0
Rhizobium_cellulosilyticum	0	0	0	0	0	0	0	0	0	0	0	0	0	0	0	0	0	0	0	0	0	0	0	0	0	0	0	0	0
Rhizobium_galegae	0	0	0	0	0	0	0	0	0	0	0	0	0	0	0	0	0	0	0	0	0	0	0	0	0	0	0	0	0
Rhizobium_rosettiformans	0	0	0	0	0	0	0	0	0	0	0	0	0	0	0	0	0	0	0	0	0	0	0	0	0	0	0	0	0
Rhodococcus_coprophilus	0	0	0	0	0	0	0	0	0	0	0	0	0	0	0	0	0	0	0	0	0	0	0	0	0	0	0	0	0
Rhodococcus_corynebacterioides	0	0	0	0	0	0	0	0	0	0	0	0	0	0	0	0	0	0	0	0	0	0	0	0	0	0	0	0	0
Rhodococcus_qingshengii	0	0	0	0	0	0	0	0	0	0	0	0	0	0	0	0	0	0	0	0	0	0	0	0	0	0	0	0	0
Rhodococcus_sovatensis	0	0	0	0	0	0	0	0	0	0	0	0	0	0	0	0	0	0	0	0	0	0	0	0	0	0	0	0	0
Rhodomicrobium_vannielii	0	0	0	0	0	0	0	0	0	0	0	0	0	0	0	0	0	0	0	0	0	0	0	0	0	0	0	0	0
Rhodopseudomonas_boonkerdii	0	0	0	0	0	0	0	0	0	0	0	0	0	0	0	0	0	0	0	0	0	0	0	0	0	0	0	0	0
Romboutsia_timonensis	0	0	0	0	0	0	0	0	0	0	0	0	0	0	0	0	0	0	0	0	0	0	0	0	0	0	0	0	0
Roseomonas_aestuarii	0	0	0	0	0	0	0	0	0	0	0	0	0	0	0	0	0	0	0	0	0	0	0	0	0	0	0	0	0
Roseomonas_mucosa	0	0	0	0	0	0	0	0	0	0	0	0	0	0	0	0	0	0	0	0	0	0	0	0	0	0	0	0	0
Roseomonas_vinacea	0	0	0	0	0	0	0	0	0	0	0	0	0	0	0	0	0	0	0	0	0	0	0	0	0	0	0	0	0
Rothia_aeria	0	0	0	0	0	0	0	0	0	0	0	0	0	0	0	0	0	0	0	0	0	0	0	0	0	0	0	0	0
Rubrobacter_xylanophilus	0	0	0	0	0	0	0	0	0	0	0	0	0	0	0	0	0	0	0	0	0	0	0	0	0	0	0	0	0
Ruminococcus_callidus	0	0	0	0	0	0	0	0	0	0	0	0	0	0	0	0	0	0	0	0	0	0	0	0	0	0	0	0	0
Sanguibacter_keddieii	0	0	0	0	0	0	0	0	0	0	0	0	0	0	0	0	0	0	0	0	0	0	0	0	0	0	0	0	0
Segetibacter_aerophilus	0	0	0	0	0	0	0	0	0	0	0	0	0	0	0	0	0	0	0	0	0	0	0	0	0	0	0	0	0
Selenomonas_infelix	0	0	0	0	0	0	0	0	0	0	0	0	0	0	0	0	0	0	0	0	0	0	0	0	0	0	0	0	0
Serratia_symbiotica	0	0	0	0	0	0	0	0	0	0	0	0	0	0	0	0	0	0	0	0	0	0	0	0	0	0	0	0	0
Simplicispira_psychrophila	0	0	0	0	0	0	0	0	0	0	0	0	0	0	0	0	0	0	0	0	0	0	0	0	0	0	0	0	0
Simplicispira_soli	0	0	0	0	0	0	0	0	0	0	0	0	0	0	0	0	0	0	0	0	0	0	0	0	0	0	0	0	0
Skermanella_aerolata	0	0	0	0	0	0	0	0	0	0	0	0	0	0	0	0	0	0	0	0	0	0	0	0	0	0	0	0	0
Snodgrassella_alvi	0	0	0	0	0	0	0	0	0	0	0	0	0	0	0	0	0	0	0	0	0	0	0	0	0	0	0	0	0
Solobacterium_moorei	0	0	0	0	0	0	0	0	0	0	0	0	0	0	0	0	0	0	0	0	0	0	0	0	0	0	0	0	0
Sphaerotilus_natans	0	0	0	0	0	0	0	0	0	0	0	0	0	0	0	0	0	0	0	0	0	0	0	0	0	0	0	0	0
Sphingobacterium_alimentarium	0	0	0	0	0	0	0	0	0	0	0	0	0	0	0	0	0	0	0	0	0	0	0	0	0	0	0	0	0
Sphingobacterium_daejeonense	0	0	0	0	0	0	0	0	0	0	0	0	0	0	0	0	0	0	0	0	0	0	0	0	0	0	0	0	0
Sphingobacterium_hotanense	0	0	0	0	0	0	0	0	0	0	0	0	0	0	0	0	0	0	0	0	0	0	0	0	0	0	0	0	0
Sphingobium_olei	0	0	0	0	0	0	0	0	0	0	0	0	0	0	0	0	0	0	0	0	0	0	0	0	0	0	0	0	0
Sphingobium_yanoikuyae	0	0	0	0	0	0	0	0	0	0	0	0	0	0	0	0	0	0	0	0	0	0	0	0	0	0	0	0	0
Sphingomonas_hunanensis	0	0	0	0	0	0	0	0	0	0	0	0	0	0	0	0	0	0	0	0	0	0	0	0	0	0	0	0	0
Sphingomonas_koreensis	0	0	0	0	0	0	0	0	0	0	0	0	0	0	0	0	0	0	0	0	0	0	0	0	0	0	0	0	0
Sphingomonas_melonis	0	0	0	0	0	0	0	0	0	0	0	0	0	0	0	0	0	0	0	0	0	0	0	0	0	0	0	0	0
Sphingomonas_olei	0	0	0	0	0	0	0	0	0	0	0	0	0	0	0	0	0	0	0	0	0	0	0	0	0	0	0	0	0
Sphingomonas_parapaucimobilis	0	0	0	0	0	0	0	0	0	0	0	0	0	0	0	0	0	0	0	0	0	0	0	0	0	0	0	0	0
Sphingomonas_paucimobilis	0	0	0	0	0	0	0	0	0	0	0	0	0	0	0	0	0	0	0	0	0	0	0	0	0	0	0	0	0
Sphingomonas_sanxanigenens	0	0	0	0	0	0	0	0	0	0	0	0	0	0	0	0	0	0	0	0	0	0	0	0	0	0	0	0	0
Sphingomonas_wittichii	0	0	0	0	0	0	0	0	0	0	0	0	0	0	0	0	0	0	0	0	0	0	0	0	0	0	0	0	0
Sphingopyxis_alaskensis	0	0	0	0	0	0	0	0	0	0	0	0	0	0	0	0	0	0	0	0	0	0	0	0	0	0	0	0	0
Sporacetigenium_mesophilum	0	0	0	0	0	0	0	0	0	0	0	0	0	0	0	0	0	0	0	0	0	0	0	0	0	0	0	0	0
Sporolactobacillus_nakayamae	0	0	0	0	0	0	0	0	0	0	0	0	0	0	0	0	0	0	0	0	0	0	0	0	0	0	0	0	0
Staphylococcus_cohnii	0	0	0	0	0	0	0	0	0	0	0	0	0	0	0	0	0	0	0	0	0	0	0	0	0	0	0	0	0
Staphylococcus_fleurettii	0	0	0	0	0	0	0	0	0	0	0	0	0	0	0	0	0	0	0	0	0	0	0	0	0	0	0	0	0
Staphylococcus_hominis	0	0	0	0	0	0	0	0	0	0	0	0	0	0	0	0	0	0	0	0	0	0	0	0	0	0	0	0	0
Staphylococcus_simiae	0	0	0	0	0	0	0	0	0	0	0	0	0	0	0	0	0	0	0	0	0	0	0	0	0	0	0	0	0
Staphylococcus_xylosus	0	0	0	0	0	0	0	0	0	0	0	0	0	0	0	0	0	0	0	0	0	0	0	0	0	0	0	0	0
Starkeya_novella	0	0	0	0	0	0	0	0	0	0	0	0	0	0	0	0	0	0	0	0	0	0	0	0	0	0	0	0	0
Stenotrophobacter_terrae	0	0	0	0	0	0	0	0	0	0	0	0	0	0	0	0	0	0	0	0	0	0	0	0	0	0	0	0	0
Stenotrophomonas_bentonitica	0	0	0	0	0	0	0	0	0	0	0	0	0	0	0	0	0	0	0	0	0	0	0	0	0	0	0	0	0
Streptococcus_anginosus	0	0	0	0	0	0	0	0	0	0	0	0	0	0	0	0	0	0	0	0	0	0	0	0	0	0	0	0	0
Streptococcus_cristatus	0	0	0	0	0	0	0	0	0	0	0	0	0	0	0	0	0	0	0	0	0	0	0	0	0	0	0	0	0
Streptococcus_devriesei	0	0	0	0	0	0	0	0	0	0	0	0	0	0	0	0	0	0	0	0	0	0	0	0	0	0	0	0	0
Streptococcus_gordonii	0	0	0	0	0	0	0	0	0	0	0	0	0	0	0	0	0	0	0	0	0	0	0	0	0	0	0	0	0
Streptococcus_intermedius	0	0	0	0	0	0	0	0	0	0	0	0	0	0	0	0	0	0	0	0	0	0	0	0	0	0	0	0	0
Streptococcus_lactarius	0	0	0	0	0	0	0	0	0	0	0	0	0	0	0	0	0	0	0	0	0	0	0	0	0	0	0	0	0
Streptococcus_mitis	0	0	0	0	0	0	0	0	0	0	0	0	0	0	0	0	0	0	0	0	0	0	0	0	0	0	0	0	0
Streptococcus_pasteurianus	0	0	0	0	0	0	0	0	0	0	0	0	0	0	0	0	0	0	0	0	0	0	0	0	0	0	0	0	0
Streptococcus_pluranimalium	0	0	0	0	0	0	0	0	0	0	0	0	0	0	0	0	0	0	0	0	0	0	0	0	0	0	0	0	0
Succiniclasticum_ruminis	0	0	0	0	0	0	0	0	0	0	0	0	0	0	0	0	0	0	0	0	0	0	0	0	0	0	0	0	0
Tepidisphaera_mucosa	0	0	0	0	0	0	0	0	0	0	0	0	0	0	0	0	0	0	0	0	0	0	0	0	0	0	0	0	0
Tessaracoccus_flavescens	0	0	0	0	0	0	0	0	0	0	0	0	0	0	0	0	0	0	0	0	0	0	0	0	0	0	0	0	0
Thermomonas_carbonis	0	0	0	0	0	0	0	0	0	0	0	0	0	0	0	0	0	0	0	0	0	0	0	0	0	0	0	0	0
Thermus_thermophilus	0	0	0	0	0	0	0	0	0	0	0	0	0	0	0	0	0	0	0	0	0	0	0	0	0	0	0	0	0
Thiobaca_trueperi	0	0	0	0	0	0	0	0	0	0	0	0	0	0	0	0	0	0	0	0	0	0	0	0	0	0	0	0	0
Treponema_socranskii	0	0	0	0	0	0	0	0	0	0	0	0	0	0	0	0	0	0	0	0	0	0	0	0	0	0	0	0	0
Trichococcus_flocculiformis	0	0	0	0	0	0	0	0	0	0	0	0	0	0	0	0	0	0	0	0	0	0	0	0	0	0	0	0	0
Truepera_radiovictrix	0	0	0	0	0	0	0	0	0	0	0	0	0	0	0	0	0	0	0	0	0	0	0	0	0	0	0	0	0
Turicibacter_sanguinis	0	0	0	0	0	0	0	0	0	0	0	0	0	0	0	0	0	0	0	0	0	0	0	0	0	0	0	0	0
Undibacterium_oligocarboniphilum	0	0	0	0	0	0	0	0	0	0	0	0	0	0	0	0	0	0	0	0	0	0	0	0	0	0	0	0	0
Undibacterium_seohonense	0	0	0	0	0	0	0	0	0	0	0	0	0	0	0	0	0	0	0	0	0	0	0	0	0	0	0	0	0
Vagococcus_fluvialis	0	0	0	0	0	0	0	0	0	0	0	0	0	0	0	0	0	0	0	0	0	0	0	0	0	0	0	0	0
Veillonella_parvula	0	0	0	0	0	0	0	0	0	0	0	0	0	0	0	0	0	0	0	0	0	0	0	0	0	0	0	0	0
Vicinamibacter_silvestris	0	0	0	0	0	0	0	0	0	0	0	0	0	0	0	0	0	0	0	0	0	0	0	0	0	0	0	0	0
Virgibacillus_senegalensis	0	0	0	0	0	0	0	0	0	0	0	0	0	0	0	0	0	0	0	0	0	0	0	0	0	0	0	0	0
Vogesella_mureinivorans	0	0	0	0	0	0	0	0	0	0	0	0	0	0	0	0	0	0	0	0	0	0	0	0	0	0	0	0	0
Weissella_cibaria	0	0	0	0	0	0	0	0	0	0	0	0	0	0	0	0	0	0	0	0	0	0	0	0	0	0	0	0	0
Weissella_hellenica	0	0	0	0	0	0	0	0	0	0	0	0	0	0	0	0	0	0	0	0	0	0	0	0	0	0	0	0	0
Zhihengliuella_aestuarii	0	0	0	0	0	0	0	0	0	0	0	0	0	0	0	0	0	0	0	0	0	0	0	0	0	0	0	0	0

## Sheet: Raw mare's milk
phylum
taxonomy	Z1	Z4	Z8	Z16	Q7	Q8	Q10	Q13	Q14	Q17	Q21	Q23	Q26
Acidobacteria	0	0	0	0	0	1	5	0	0	0	1	3	3
Actinobacteria	4	2	3	2035	83	54	95	29	12	10	125	33	184
BRC1	0	0	0	3	0	0	0	0	0	0	0	0	0
Bacteroidetes	0	2	0	4	27	56	69	5	7	11	39	3	36
Chloroflexi	1	0	0	0	0	0	1	0	0	0	1	0	0
Cyanobacteria	0	1	0	0	0	0	1	0	0	0	0	0	1
Deinococcus-Thermus	0	8	2	2	31	16	124	11	14	10	122	184	47
FBP	0	0	0	0	0	0	0	0	0	1	0	0	0
Firmicutes	8635	896	7100	505	5202	4672	8750	1306	5305	3518	4296	6049	2082
Fusobacteria	0	0	0	0	0	8	0	0	0	0	0	8	0
Gemmatimonadetes	0	0	0	0	0	0	11	0	0	0	0	0	2
OD1	0	0	0	0	0	0	0	0	0	0	0	0	1
Planctomycetes	0	0	0	0	3	1	0	0	0	0	0	0	1
Proteobacteria	72	56	53	405	442	595	1521	187	102	596	1647	260	2727
Spirochaetes	0	0	0	0	0	0	0	0	0	0	1	0	0
TM7	0	0	3	5	3	0	17	1	0	0	10	10	12
Verrucomicrobia	0	0	0	0	0	0	0	0	0	0	2	0	0
Viridiplantae	0	0	0	0	0	0	27	0	1	0	16	0	0
unclassified	0	0	0	0	0	0	4	0	0	1	0	0	1
genus
taxonomy	Z1	Z4	Z8	Z16	Q7	Q8	Q10	Q13	Q14	Q17	Q21	Q23	Q26
Lactobacillus	60	587	128	152	4760	2183	7371	940	735	428	3201	1635	1200
Staphylococcus	7479	7	6176	276	51	100	64	11	4395	239	156	3850	465
Lactococcus	32	229	48	1	86	43	364	158	91	2476	333	21	146
Enterococcus	591	0	12	0	16	2179	19	2	4	1	25	2	0
Bifidobacterium	0	0	1	2004	51	0	1	7	1	0	36	6	1
Acinetobacter	19	15	5	300	167	116	555	39	24	31	590	49	114
Macrococcus	252	5	607	1	13	6	72	11	1	326	15	375	3
Enterobacter	3	7	4	7	8	33	2	3	4	16	11	4	1559
Streptococcus	4	14	92	9	115	39	283	144	44	9	80	45	152
Massilia	0	4	1	4	21	252	168	7	1	1	290	5	28
Pantoea	0	0	0	0	0	13	0	0	0	4	11	20	523
Moraxella	13	3	16	15	37	29	136	18	8	7	164	19	31
Thermus	0	8	2	0	29	10	99	2	12	7	105	164	39
Acetobacter	2	7	4	0	47	16	29	3	4	211	5	88	14
Klebsiella	0	0	0	5	4	3	20	23	15	267	7	1	78
Anaerobacillus	3	0	3	14	30	7	103	18	2	1	139	6	20
Curvibacter	6	0	13	24	25	6	106	14	3	1	63	4	20
unclassified	14	7	32	15	7	17	57	9	5	11	26	41	41
Cutibacterium	1	0	0	16	13	22	32	7	8	6	35	4	127
Lysobacter	3	4	1	1	22	5	56	2	3	3	63	6	16
Paenibacillus	0	44	2	0	5	8	52	0	1	1	21	1	39
Paracoccus	2	0	0	4	8	3	54	1	1	0	68	1	30
Brevundimonas	3	1	1	8	23	9	66	3	1	0	41	2	11
Chryseomicrobium	0	3	0	0	29	2	52	1	4	1	68	2	0
Bacillus	0	0	3	2	13	5	65	4	9	2	18	25	10
Clostridium	0	0	0	9	0	1	37	0	2	0	107	0	0
Vagococcus	145	0	0	0	0	0	0	0	0	0	0	0	0
Pseudomonas	2	0	0	0	6	5	13	4	0	1	59	1	19
Luteimonas	4	6	0	4	2	1	20	2	1	1	36	2	12
Deinococcus	0	0	0	2	2	4	20	9	2	3	17	15	8
Novosphingobium	0	0	0	0	0	0	11	0	2	0	0	0	60
Finegoldia	0	0	0	1	18	0	45	0	0	0	8	0	0
Gemella	0	2	0	0	23	6	32	0	3	0	0	3	2
Brevibacillus	1	1	0	0	11	0	16	0	0	1	15	9	14
Cupriavidus	0	0	0	0	3	0	11	0	2	1	13	21	11
Exiguobacterium	0	0	0	0	0	4	53	2	0	0	0	0	1
Corynebacterium	0	0	0	6	0	11	7	1	1	2	7	2	21
Aerococcus	44	0	0	0	2	0	3	0	0	0	8	0	0
Methylorubrum	0	2	0	0	0	0	33	14	1	2	0	3	2
Anaerococcus	0	0	0	0	15	12	8	0	0	1	18	0	1
Anoxybacillus	0	0	0	0	0	1	6	0	0	1	31	5	9
Kallipyga	0	0	0	0	0	53	0	0	0	0	0	0	0
Leuconostoc	0	0	0	0	0	1	2	4	0	19	0	16	8
Acidovorax	0	0	1	0	4	15	9	0	0	0	12	2	6
Chryseobacterium	0	2	0	3	8	1	9	2	5	4	7	0	7
Serratia	1	0	0	1	3	2	13	0	0	7	13	2	2
Escherichia	0	0	0	0	7	5	7	1	1	1	12	3	6
Morus	0	0	0	0	0	0	27	0	1	0	12	0	0
Granulicatella	0	0	0	0	0	0	29	0	0	1	0	0	1
Caulobacter	0	0	2	0	1	0	5	0	0	0	11	3	8
Actinobacillus	0	2	0	0	6	2	0	4	5	2	0	0	8
Flectobacillus	0	0	0	0	0	27	0	2	0	0	0	0	0
Stenotrophomonas	0	0	0	0	0	0	19	2	0	4	1	0	2
Thermomonas	0	0	0	8	2	1	3	0	0	1	5	4	4
Sphingomonas	0	0	0	6	3	5	5	0	0	1	2	1	4
Planococcus	0	0	0	0	0	3	6	0	0	0	17	0	0
Altererythrobacter	1	0	0	4	1	0	18	0	1	0	0	0	0
Comamonas	0	0	0	0	4	2	3	1	1	2	9	0	3
Microbacterium	0	0	0	2	1	2	8	1	0	0	7	0	4
Shinella	0	0	1	0	1	0	5	0	1	0	13	0	4
Jeotgalicoccus	0	0	0	16	1	0	0	0	0	0	5	1	1
Tetragenococcus	0	0	0	0	8	0	0	5	5	2	2	2	0
Veillonella	0	0	0	0	1	2	7	0	0	3	0	10	1
Cloacibacterium	0	0	0	0	1	19	2	0	0	0	1	0	0
Duganella	0	0	0	0	3	15	0	1	0	1	2	0	1
Qipengyuania	0	0	0	1	1	0	3	0	0	0	17	0	1
Janthinobacterium	0	0	0	0	3	3	2	2	0	1	8	0	3
Neisseria	1	0	0	0	1	0	7	0	1	0	6	2	4
Sphingobium	0	0	0	0	2	0	5	1	0	0	0	0	14
Flavobacterium	0	0	0	0	3	5	6	0	0	0	6	0	1
Achromobacter	0	0	0	0	0	0	0	0	0	0	11	1	8
Kocuria	0	0	0	0	1	0	1	3	0	0	9	3	3
Pseudoxanthomonas	0	0	0	1	0	0	5	0	1	0	0	1	12
Rubellimicrobium	1	0	0	0	1	0	8	0	0	0	7	2	1
Sphingobacterium	0	0	0	0	5	0	4	0	0	0	10	0	1
Undibacterium	0	0	0	0	0	20	0	0	0	0	0	0	0
Haemophilus	0	0	0	0	1	1	16	0	0	0	1	0	0
Methylobacterium	0	0	0	0	0	0	4	7	1	1	2	1	2
Ralstonia	1	0	1	0	0	0	7	0	0	0	8	0	1
Sphaerotilus	0	0	0	0	0	0	3	12	0	1	2	0	0
Mitsuokella	0	0	0	17	0	0	0	0	0	0	0	0	0
Pedobacter	0	0	0	0	1	0	7	0	0	0	9	0	0
Nocardioides	0	0	0	2	0	0	5	0	0	0	3	0	6
Oribacterium	0	0	0	0	0	0	16	0	0	0	0	0	0
Propionibacterium	0	2	0	0	6	3	2	0	0	0	0	1	2
Rhizobium	1	0	0	0	4	0	2	2	0	0	3	0	4
Ensifer	0	0	0	0	0	0	6	0	0	0	8	0	1
Herbaspirillum	0	0	0	1	0	3	1	0	0	0	8	1	1
Psychrobacillus	0	0	0	0	0	0	14	0	0	0	0	0	1
Raoultella	0	0	0	1	0	0	0	0	0	14	0	0	0
Dechloromonas	0	0	0	0	2	0	2	0	0	0	6	0	4
Microvirga	0	0	0	0	0	1	13	0	0	0	0	0	0
Aminobacter	0	0	0	0	0	0	0	1	1	0	10	0	1
Auricoccus	0	0	0	0	1	1	0	0	1	0	10	0	0
Noviherbaspirillum	0	0	0	0	0	1	12	0	0	0	0	0	0
Rhodococcus	0	0	0	0	2	0	5	1	0	0	1	1	3
Alloprevotella	0	0	0	0	0	0	10	0	0	1	0	1	0
Bosea	0	0	0	0	2	0	5	0	0	0	1	4	0
Ornithinimicrobium	0	0	0	0	0	1	7	0	0	0	3	1	0
Variovorax	1	0	1	1	0	0	0	0	0	0	0	0	9
Paraburkholderia	0	0	0	0	0	0	0	0	0	0	0	0	11
Caedibacter	0	0	0	0	0	0	10	0	0	0	0	0	0
Capnocytophaga	0	0	0	0	0	0	8	0	0	0	2	0	0
Fusobacterium	0	0	0	0	0	7	0	0	0	0	0	3	0
Mucilaginibacter	0	0	0	0	0	0	0	0	0	0	0	0	10
Prevotella	0	0	0	0	0	1	5	0	0	1	0	2	1
Aeromonas	0	1	0	0	3	0	1	0	0	0	0	0	4
Burkholderia	0	0	2	0	0	1	5	1	0	0	0	0	0
Citrobacter	0	0	0	0	0	0	0	0	1	7	0	0	1
Gemmatimonas	0	0	0	0	0	0	9	0	0	0	0	0	0
Malikia	0	0	0	2	1	4	0	0	0	0	0	0	2
Sphingopyxis	0	0	0	2	1	0	2	0	0	0	4	0	0
Actinomyces	0	0	0	0	0	0	5	1	0	0	1	1	0
Brachybacterium	1	0	0	3	1	0	1	0	0	0	0	2	0
Carnobacterium	5	0	0	0	1	1	0	0	0	1	0	0	0
Devosia	0	1	0	0	2	0	1	1	0	0	0	0	3
Erythromicrobium	0	0	0	0	0	2	1	0	0	0	4	0	1
Janibacter	0	0	1	0	0	0	3	1	0	0	1	2	0
Meiothermus	0	0	0	0	0	0	3	0	0	0	0	5	0
Pelomonas	0	0	0	0	1	3	1	1	0	1	1	0	0
Porphyromonas	0	0	0	0	0	1	3	0	1	0	0	0	3
Caballeronia	0	0	0	0	0	0	0	0	0	0	0	0	7
Citricoccus	1	0	0	0	0	2	0	0	0	0	0	2	2
Delftia	0	0	0	0	0	0	1	1	0	1	2	1	1
Micrococcus	0	0	0	0	0	0	0	0	0	2	5	0	0
Rhizobacter	0	0	0	0	0	0	0	0	0	0	7	0	0
Roseomonas	0	0	0	0	0	0	4	2	1	0	0	0	0
Virgibacillus	0	0	0	0	0	0	1	0	3	0	0	3	0
Aquabacterium	0	0	0	0	0	1	0	0	0	0	4	0	1
Arthrobacter	1	0	0	0	1	2	0	0	0	0	0	1	1
Eubacterium	0	0	0	0	1	1	0	0	0	0	4	0	0
Facklamia	0	0	0	0	0	0	0	1	0	0	5	0	0
Leptotrichia	0	0	0	0	0	1	0	0	0	0	0	5	0
Membranicola	0	0	0	0	0	0	0	0	0	0	0	0	6
Methylopila	0	0	0	0	0	0	0	0	0	0	5	0	1
Microbispora	0	0	0	0	0	0	0	1	1	0	0	0	4
Proteiniclasticum	0	0	0	0	0	0	6	0	0	0	0	0	0
Segetibacter	0	0	0	0	5	0	1	0	0	0	0	0	0
Aquincola	0	0	0	1	2	0	0	0	0	0	1	0	1
Brevibacterium	0	0	0	1	0	0	0	0	0	0	0	2	2
Cellvibrio	0	0	0	0	0	0	0	0	0	1	0	2	2
Fenollaria	0	0	0	0	0	0	0	0	0	0	5	0	0
Gemmobacter	0	0	0	0	0	0	0	0	0	0	0	0	5
Gracilibacillus	0	0	0	0	0	0	3	2	0	0	0	0	0
Lentibacillus	0	0	0	0	0	0	2	1	2	0	0	0	0
Mobilicoccus	0	0	0	0	0	0	0	0	0	0	0	0	5
Peptoniphilus	0	0	0	0	0	1	0	1	1	0	2	0	0
Rhodoferax	0	0	0	0	0	4	0	0	0	0	0	1	0
Arenimonas	0	0	0	0	0	0	0	0	0	0	1	0	3
Atopostipes	1	0	0	2	0	0	0	1	0	0	0	0	0
Craurococcus	0	0	0	0	0	0	4	0	0	0	0	0	0
Desemzia	0	0	0	0	0	0	3	0	0	0	1	0	0
Empedobacter	0	0	0	0	0	0	0	0	0	4	0	0	0
Gilliamella	0	0	0	0	0	0	0	0	0	0	0	0	4
Hydrogenophaga	1	0	0	1	1	0	0	0	0	1	0	0	0
Nicoletella	0	1	0	0	1	2	0	0	0	0	0	0	0
Ochrobactrum	0	0	0	0	0	0	0	2	2	0	0	0	0
Phenylobacterium	0	0	0	0	0	0	4	0	0	0	0	0	0
Pinus	0	0	0	0	0	0	0	0	0	0	4	0	0
Psychrobacter	1	0	0	0	0	0	0	0	0	0	0	0	3
Rubrobacter	0	0	0	0	0	0	0	0	0	0	3	1	0
Simplicispira	0	0	0	0	0	0	3	0	0	0	0	0	1
Truepera	0	0	0	0	0	2	2	0	0	0	0	0	0
Acidibacter	0	0	0	0	0	1	0	0	2	0	0	0	0
Aciditerrimonas	0	0	0	0	0	3	0	0	0	0	0	0	0
Brachymonas	0	0	0	0	0	0	0	0	0	0	3	0	0
Edaphobacter	0	0	0	0	0	0	0	0	0	0	0	0	3
Flavisolibacter	0	0	0	0	1	0	0	0	0	0	0	0	2
Gordonia	0	0	0	0	0	0	1	2	0	0	0	0	0
Lawsonella	0	0	0	0	0	0	2	0	0	0	1	0	0
Mesorhizobium	0	0	0	0	0	1	2	0	0	0	0	0	0
Mongoliitalea	0	0	0	0	0	0	0	0	0	0	3	0	0
Oxalicibacterium	0	0	0	0	0	0	0	0	0	0	3	0	0
Porphyrobacter	0	0	0	0	0	0	0	0	0	0	1	0	2
Pseudarthrobacter	0	0	0	0	0	2	0	0	0	0	1	0	0
Pseudoclavibacter	0	0	0	0	2	0	0	0	0	0	0	1	0
Pseudorhodoplanes	0	0	0	0	0	0	0	0	3	0	0	0	0
Ramlibacter	0	0	0	0	0	1	1	0	0	0	0	1	0
Ruminococcus	3	0	0	0	0	0	0	0	0	0	0	0	0
Sanguibacter	0	0	0	0	0	0	3	0	0	0	0	0	0
Vicinamibacter	0	0	0	0	0	0	0	0	0	0	1	2	0
Weissella	0	0	0	0	1	0	1	0	0	0	0	1	0
Abiotrophia	0	0	0	0	0	0	0	0	0	0	0	2	0
Alkanindiges	0	0	0	1	0	1	0	0	0	0	0	0	0
Alysiella	0	0	0	0	0	0	0	0	0	0	0	0	2
Azospirillum	0	0	0	0	0	0	0	1	0	0	1	0	0
Bacteroides	0	0	0	0	0	2	0	0	0	0	0	0	0
Chryseolinea	0	0	0	0	0	0	2	0	0	0	0	0	0
Cnuella	0	0	0	0	0	0	1	0	0	0	1	0	0
Dermacoccus	0	0	0	0	0	0	0	1	0	0	0	0	1
Falsirhodobacter	0	0	0	0	0	0	0	0	0	0	0	0	2
Flaviaesturariibacter	0	0	0	0	0	0	2	0	0	0	0	0	0
Geodermatophilus	0	0	0	0	2	0	0	0	0	0	0	0	0
Hahella	2	0	0	0	0	0	0	0	0	0	0	0	0
Kluyvera	0	0	0	0	0	1	0	0	1	0	0	0	0
Lautropia	2	0	0	0	0	0	0	0	0	0	0	0	0
Luteibacter	0	0	0	0	0	0	0	0	0	0	0	0	2
Luteitalea	0	0	0	0	0	0	2	0	0	0	0	0	0
Luteolibacter	0	0	0	0	0	0	0	0	0	0	2	0	0
Mycetocola	0	0	0	0	0	0	2	0	0	0	0	0	0
Negativicoccus	0	0	0	0	0	1	1	0	0	0	0	0	0
Nordella	0	0	0	0	0	0	0	0	2	0	0	0	0
Oceanobacillus	0	0	0	0	0	0	0	0	1	0	0	1	0
Parviterribacter	0	0	0	0	0	0	0	2	0	0	0	0	0
Pseudochrobactrum	0	0	0	0	0	0	0	0	0	0	2	0	0
Rhodobacter	0	0	0	0	0	0	0	0	0	0	0	0	2
Sediminibacterium	0	0	0	0	0	0	2	0	0	0	0	0	0
Selenomonas	0	0	0	0	0	0	0	0	0	0	0	2	0
Skermanella	0	0	0	0	0	0	0	0	0	0	2	0	0
Spirosoma	0	0	0	0	0	0	0	0	0	0	0	0	2
Tepidisphaera	0	0	0	0	2	0	0	0	0	0	0	0	0
Trichococcus	1	0	0	0	0	1	0	0	0	0	0	0	0
Zhihengliuella	0	0	1	0	0	0	1	0	0	0	0	0	0
g_Planobacterium	0	0	0	0	0	0	2	0	0	0	0	0	0
Aeromicrobium	0	0	0	0	0	0	0	0	0	0	0	0	1
Agrococcus	0	0	0	0	1	0	0	0	0	0	0	0	0
Alishewanella	0	0	0	0	0	0	0	0	0	0	1	0	0
Alistipes	0	0	0	1	0	0	0	0	0	0	0	0	0
Aquihabitans	0	0	0	0	0	0	1	0	0	0	0	0	0
Aquitalea	0	0	0	0	0	0	0	1	0	0	0	0	0
Arboricoccus	1	0	0	0	0	0	0	0	0	0	0	0	0
Asticcacaulis	0	0	0	0	1	0	0	0	0	0	0	0	0
Aureimonas	0	0	0	0	1	0	0	0	0	0	0	0	0
Bergeyella	0	0	0	0	0	0	0	0	0	0	0	0	1
Bradyrhizobium	0	0	0	0	0	0	0	0	0	0	0	0	1
Cecembia	0	0	0	0	0	0	0	1	0	0	0	0	0
Cereibacter	0	0	0	1	0	0	0	0	0	0	0	0	0
Cohnella	0	0	0	0	0	0	0	0	0	0	0	1	0
Croceicoccus	0	0	0	0	0	0	0	1	0	0	0	0	0
Cystobacter	0	0	0	0	0	0	0	0	0	0	0	0	1
Dietzia	0	0	0	0	0	0	1	0	0	0	0	0	0
Edaphobaculum	0	0	0	0	0	0	1	0	0	0	0	0	0
Ewingella	1	0	0	0	0	0	0	0	0	0	0	0	0
Fimbriiglobus	0	0	0	0	0	1	0	0	0	0	0	0	0
Flavitalea	0	0	0	0	1	0	0	0	0	0	0	0	0
Fluviicola	0	0	0	0	0	0	1	0	0	0	0	0	0
Friedmanniella	0	0	0	0	0	1	0	0	0	0	0	0	0
Gaiella	0	0	0	0	0	0	0	0	0	0	0	1	0
Geobacillus	0	0	0	0	0	0	0	0	0	0	1	0	0
Halomonas	0	0	0	0	0	0	0	0	0	0	0	0	1
Hyphomicrobium	0	0	0	0	1	0	0	0	0	0	0	0	0
Jeotgalibaca	0	0	0	0	0	0	0	0	0	0	0	0	1
Kineosporia	0	0	0	0	0	0	0	0	0	0	0	1	0
Knoellia	0	0	0	0	0	0	0	0	0	0	0	1	0
Lachnoanaerobaculum	0	0	0	0	0	1	0	0	0	0	0	0	0
Luteococcus	0	0	0	0	0	0	0	1	0	0	0	0	0
Lysinibacillus	0	0	0	0	0	0	0	0	0	0	0	1	0
Macellibacteroides	0	0	0	0	0	0	1	0	0	0	0	0	0
Melittangium	0	0	0	0	0	0	1	0	0	0	0	0	0
Metaprevotella	0	0	0	0	1	0	0	0	0	0	0	0	0
Mogibacterium	0	0	0	0	0	0	0	0	0	0	0	1	0
Nitrolancea	0	0	0	0	0	0	1	0	0	0	0	0	0
Ohtaekwangia	0	0	0	0	1	0	0	0	0	0	0	0	0
Olivibacter	0	0	0	0	0	0	0	0	0	0	0	0	1
Ottowia	0	0	0	0	1	0	0	0	0	0	0	0	0
Paludibaculum	0	0	0	0	0	0	1	0	0	0	0	0	0
Phycicoccus	0	0	0	0	0	1	0	0	0	0	0	0	0
Planifilum	0	0	0	0	0	0	1	0	0	0	0	0	0
Polaromonas	0	0	0	0	0	0	0	0	0	0	0	0	1
Polymorphobacter	0	0	0	0	0	0	0	0	1	0	0	0	0
Prevotellamassilia	0	0	0	0	0	0	0	0	0	0	0	0	1
Rehaibacterium	0	0	0	0	0	0	0	0	0	0	1	0	0
Reyranella	0	0	0	0	0	0	0	1	0	0	0	0	0
Rheinheimera	0	0	0	0	0	0	0	0	0	0	0	0	1
Rhodomicrobium	0	0	0	0	0	0	0	0	1	0	0	0	0
Rhodoplanes	0	0	0	0	0	0	1	0	0	0	0	0	0
Rhodopseudomonas	0	0	0	0	0	0	0	0	0	0	1	0	0
Romboutsia	1	0	0	0	0	0	0	0	0	0	0	0	0
Rothia	0	0	0	0	0	0	0	0	0	0	1	0	0
Salinimicrobium	0	0	0	0	0	0	1	0	0	0	0	0	0
Snodgrassella	0	0	0	0	0	0	0	0	0	0	0	0	1
Solirubrobacter	0	0	0	0	1	0	0	0	0	0	0	0	0
Solobacterium	0	0	0	0	0	0	0	0	0	0	0	0	1
Sphaerobacteraceae	0	0	0	0	0	0	0	0	0	0	1	0	0
Sporacetigenium	0	0	0	0	0	0	0	0	0	0	0	0	1
Sporolactobacillus	0	0	0	0	0	1	0	0	0	0	0	0	0
Starkeya	0	0	0	0	0	0	0	0	0	0	0	0	1
Stenotrophobacter	0	0	0	0	0	0	1	0	0	0	0	0	0
Succiniclasticum	0	0	0	0	0	1	0	0	0	0	0	0	0
Tessaracoccus	0	0	0	0	0	0	0	0	1	0	0	0	0
Thermoactinomyces	0	0	0	0	0	1	0	0	0	0	0	0	0
Thiobaca	0	0	0	0	0	0	0	0	1	0	0	0	0
Treponema	0	0	0	0	0	0	0	0	0	0	1	0	0
Turicibacter	0	0	0	0	0	0	0	0	0	0	0	1	0
Vogesella	0	0	0	0	0	1	0	0	0	0	0	0	0
Wautersiella	0	0	0	0	0	0	0	0	1	0	0	0	0
Azospira	0	0	0	0	0	0	0	0	0	0	0	0	0
Bacteriovorax	0	0	0	0	0	0	0	0	0	0	0	0	0
Calothrix	0	0	0	0	0	0	0	0	0	0	0	0	0
Cronobacter	0	0	0	0	0	0	0	0	0	0	0	0	0
Enhydrobacter	0	0	0	0	0	0	0	0	0	0	0	0	0
Ferribacterium	0	0	0	0	0	0	0	0	0	0	0	0	0
Geminicoccus	0	0	0	0	0	0	0	0	0	0	0	0	0
Gluconacetobacter	0	0	0	0	0	0	0	0	0	0	0	0	0
Gluconobacter	0	0	0	0	0	0	0	0	0	0	0	0	0
Kingella	0	0	0	0	0	0	0	0	0	0	0	0	0
Komagataeibacter	0	0	0	0	0	0	0	0	0	0	0	0	0
Methylophaga	0	0	0	0	0	0	0	0	0	0	0	0	0
Opitutus	0	0	0	0	0	0	0	0	0	0	0	0	0
Paeniglutamicibacter	0	0	0	0	0	0	0	0	0	0	0	0	0
Peptostreptococcus	0	0	0	0	0	0	0	0	0	0	0	0	0
Planomicrobium	0	0	0	0	0	0	0	0	0	0	0	0	0
Roseovarius	0	0	0	0	0	0	0	0	0	0	0	0	0
Rubrivivax	0	0	0	0	0	0	0	0	0	0	0	0	0
Salinibacterium	0	0	0	0	0	0	0	0	0	0	0	0	0
Shigella	0	0	0	0	0	0	0	0	0	0	0	0	0
Thauera	0	0	0	0	0	0	0	0	0	0	0	0	0
species
taxonomy	Z1	Z4	Z8	Z16	Q7	Q8	Q10	Q13	Q14	Q17	Q21	Q23	Q26
Lactobacillus_helveticus	46	581	118	132	4641	2138	7237	894	673	419	3125	1597	1170
unclassified	328	18	592	195	117	196	557	48	1973	146	442	330	530
Lactococcus_lactis	31	219	44	1	84	42	360	144	91	2474	319	21	135
Staphylococcus_vitulinus	1605	0	1851	50	5	6	13	0	9	12	6	23	7
Staphylococcus_succinus	49	0	825	21	8	35	4	2	1191	13	17	1200	64
Staphylococcus_aureus	3309	2	5	1	1	1	5	0	36	0	13	4	7
Staphylococcus_saprophyticus	49	0	100	24	11	18	1	0	756	111	46	2120	110
Staphylococcus_sciuri	2106	0	613	20	0	21	0	0	32	11	1	5	12
Enterococcus_faecalis	385	0	10	0	3	2173	5	1	2	0	0	0	0
Staphylococcus_equorum	8	1	2165	7	4	1	0	0	159	22	3	48	29
Bifidobacterium_animalis	0	0	1	2004	51	0	1	7	1	0	36	6	1
Macrococcus_caseolyticus	243	5	581	1	13	6	72	11	1	325	15	368	2
Acinetobacter_lwoffii	12	10	3	163	123	62	398	23	10	7	315	20	79
Acinetobacter_johnsonii	7	4	2	129	32	21	144	12	9	20	235	27	18
Streptococcus_thermophilus	3	11	88	8	48	17	168	143	37	3	60	11	46
Enterobacter_hormaechei	1	5	1	2	2	7	0	0	0	5	0	0	615
Thermus_scotoductus	0	8	2	0	29	10	99	2	12	7	105	164	38
Moraxella_osloensis	13	3	15	15	36	21	136	18	6	7	164	19	20
Pantoea_agglomerans	0	0	0	0	0	9	0	0	0	0	5	16	394
Klebsiella_oxytoca	0	0	0	2	3	3	11	18	10	267	7	1	76
Enterobacter_kobei	0	0	0	0	1	0	0	0	0	0	0	3	381
Enterobacter_cloacae	2	2	3	3	3	15	2	2	1	9	7	1	282
Acetobacter_pasteurianus	2	3	1	0	42	3	15	0	1	155	3	60	1
Staphylococcus_xylosus	15	0	25	4	0	3	0	0	169	4	3	49	14
Curvibacter_lanceolatus	6	0	13	24	25	6	106	14	3	1	63	4	20
Enterobacter_asburiae	0	0	0	0	0	10	0	1	2	2	3	0	267
Cutibacterium_acnes	1	0	0	16	13	22	32	7	8	6	35	4	127
Massilia_timonae	0	2	0	0	7	4	12	0	0	0	195	0	3
Lactobacillus_pontis	0	0	1	0	71	30	41	29	26	2	10	7	2
Staphylococcus_schleiferi	0	0	55	0	4	1	4	1	0	2	5	144	0
Staphylococcus_capitis	0	0	6	10	8	5	32	3	48	6	19	18	37
Enterococcus_durans	147	0	0	0	3	0	1	0	0	0	8	1	0
Chryseomicrobium_imtechense	0	3	0	0	28	1	51	1	2	1	68	2	0
Vagococcus_fluvialis	145	0	0	0	0	0	0	0	0	0	0	0	0
Clostridium_disporicum	0	0	0	0	0	0	19	0	0	0	107	0	0
Staphylococcus_warneri	8	2	7	0	1	1	2	0	27	7	5	43	2
Paenibacillus_pasadenensis	0	44	2	0	3	3	19	0	0	0	3	1	25
Streptococcus_oralis	0	0	0	1	3	1	65	0	1	1	9	13	4
Lactobacillus_plantarum	0	0	7	3	16	1	24	6	0	3	25	1	4
Massilia_varians	0	0	1	1	0	42	21	1	0	0	16	0	7
Streptococcus_gallolyticus	0	0	1	0	0	1	0	0	0	0	0	2	84
Massilia_albidiflava	0	0	0	0	0	85	0	0	0	0	0	0	0
Streptococcus_parasuis	0	1	0	0	48	10	16	0	1	0	4	1	3
Paracoccus_marcusii	0	0	0	0	1	0	15	1	0	0	44	0	21
Luteimonas_tolerans	2	6	0	4	2	1	19	0	0	1	31	1	12
Massilia_suwonensis	0	0	0	3	2	2	39	1	0	0	28	0	4
Finegoldia_magna	0	0	0	1	18	0	45	0	0	0	8	0	0
Brevundimonas_diminuta	0	0	0	0	9	6	31	0	0	0	16	0	1
Enterococcus_faecium	22	0	1	0	5	2	10	1	0	0	16	1	0
Aerococcus_viridans	44	0	0	0	2	0	3	0	0	0	8	0	0
Paenibacillus_validus	0	0	0	0	1	2	18	0	1	1	18	0	14
Kallipyga_massiliensis	0	0	0	0	0	53	0	0	0	0	0	0	0
Lactobacillus_kefiranofaciens	13	3	0	2	6	2	9	0	0	0	16	2	0
Massilia_arvi	0	0	0	0	0	0	47	3	1	0	0	0	0
Pseudomonas_fulva	1	0	0	0	1	1	0	0	0	0	35	0	13
Staphylococcus_epidermidis	0	2	1	4	3	2	3	4	11	2	8	1	10
Methylorubrum_rhodesianum	0	2	0	0	0	0	32	6	1	2	0	3	2
Brevundimonas_mediterranea	1	1	1	5	8	1	17	2	1	0	6	0	4
Brevibacillus_agri	0	1	0	0	10	0	13	0	0	1	6	3	12
Lactobacillus_fermentum	0	0	0	8	3	1	20	4	1	2	0	5	2
Brevundimonas_bullata	2	0	0	3	4	2	14	0	0	0	13	1	5
Escherichia_fergusonii	0	0	0	0	7	5	7	1	1	1	12	3	6
Lactobacillus_kefiri	0	2	0	0	10	5	12	2	0	0	1	2	9
Leuconostoc_mesenteroides	0	0	0	0	0	0	0	1	0	19	0	15	8
Deinococcus_geothermalis	0	0	0	0	2	2	17	4	0	1	5	6	5
Lactococcus_garvieae	1	7	2	0	1	1	2	12	0	0	7	0	9
Exiguobacterium_aurantiacum	0	0	0	0	0	1	36	2	0	0	0	0	1
Morus_indica	0	0	0	0	0	0	27	0	1	0	12	0	0
Lactobacillus_paracasei	0	0	0	5	4	0	2	2	1	0	17	0	8
Novosphingobium_gossypii	0	0	0	0	0	0	0	0	0	0	0	0	39
Staphylococcus_fleurettii	33	0	5	1	0	0	0	0	0	0	0	0	0
Acidovorax_temperans	0	0	1	0	4	14	6	0	0	0	6	1	5
Gemella_palaticanis	0	2	0	0	23	6	0	0	3	0	0	3	0
Massilia_oculi	0	0	0	0	1	6	17	0	0	0	9	0	2
Gemella_haemolysans	0	0	0	0	0	0	32	0	0	0	0	0	2
Lactobacillus_salivarius	0	0	0	0	0	1	0	0	26	0	0	4	3
Serratia_marcescens	0	0	0	1	3	0	12	0	0	0	13	0	2
Staphylococcus_haemolyticus	0	0	1	0	3	0	0	0	18	0	2	7	0
Anoxybacillus_tepidamans	0	0	0	0	0	0	3	0	0	0	27	0	0
Chryseobacterium_haifense	0	2	0	1	6	1	9	1	2	1	3	0	2
Anaerococcus_octavius	0	0	0	0	10	12	2	0	0	1	2	0	0
Flectobacillus_fontis	0	0	0	0	0	27	0	0	0	0	0	0	0
Anaerococcus_hydrogenalis	0	0	0	0	5	0	6	0	0	0	15	0	0
Caulobacter_henricii	0	0	2	0	1	0	4	0	0	0	9	2	8
Acinetobacter_soli	0	0	0	0	0	23	0	0	0	0	0	0	2
Shinella_zoogloeoides	0	0	1	0	1	0	5	0	1	0	13	0	4
Enterococcus_casseliflavus	24	0	0	0	0	0	0	0	0	0	0	0	0
Klebsiella_pneumoniae	0	0	0	3	1	0	9	4	5	0	0	0	2
Tetragenococcus_halophilus	0	0	0	0	8	0	0	5	5	2	2	2	0
Planococcus_citreus	0	0	0	0	0	1	5	0	0	0	17	0	0
Qipengyuania_sediminis	0	0	0	1	1	0	3	0	0	0	17	0	1
Cloacibacterium_normanense	0	0	0	0	1	19	1	0	0	0	1	0	0
Jeotgalicoccus_halotolerans	0	0	0	16	0	0	0	0	0	0	4	1	1
Acinetobacter_parvus	0	0	0	3	4	3	5	1	1	0	2	1	1
Anoxybacillus_flavithermus	0	0	0	0	0	1	3	0	0	1	4	3	9
Brevibacillus_fluminis	0	0	0	0	1	0	3	0	0	0	9	6	2
Janthinobacterium_lividum	0	0	0	0	3	3	2	1	0	1	8	0	3
Sphingobium_yanoikuyae	0	0	0	0	1	0	5	1	0	0	0	0	14
Achromobacter_piechaudii	0	0	0	0	0	0	0	0	0	0	11	1	8
Bacillus_aidingensis	0	0	0	0	1	0	3	1	6	0	5	3	0
Stenotrophomonas_maltophilia	0	0	0	0	0	0	10	2	0	4	1	0	2
Undibacterium_oligocarboniphilum	0	0	0	0	0	19	0	0	0	0	0	0	0
Actinobacillus_equuli	0	0	0	0	6	1	0	2	2	0	0	0	7
Bacillus_cereus	0	0	0	1	7	0	2	2	0	0	6	0	0
Clostridium_swellfunianum	0	0	0	0	0	0	18	0	0	0	0	0	0
Massilia_agri	0	2	0	0	4	10	0	0	0	0	1	0	1
Sphaerotilus_natans	0	0	0	0	0	0	3	12	0	1	2	0	0
Corynebacterium_accolens	0	0	0	0	0	4	2	1	1	0	3	0	6
Neisseria_mucosa	0	0	0	0	0	0	7	0	0	0	6	1	3
Acetobacter_malorum	0	1	0	0	0	1	1	2	1	7	1	0	1
Bacillus_firmus	0	0	0	0	0	0	11	0	0	0	0	2	2
Comamonas_terrigena	0	0	0	0	0	0	2	1	0	0	9	0	3
Duganella_zoogloeoides	0	0	0	0	3	7	0	1	0	1	2	0	1
Ensifer_adhaerens	0	0	0	0	0	0	6	0	0	0	8	0	1
Herbaspirillum_huttiense	0	0	0	1	0	3	1	0	0	0	8	1	1
Lactobacillus_delbrueckii	1	0	0	2	2	0	7	0	1	1	0	1	0
Paracoccus_sphaerophysae	1	0	0	3	3	0	1	0	1	0	6	0	0
Pseudomonas_luteola	0	0	0	0	0	0	0	0	0	0	15	0	0
Psychrobacillus_psychrodurans	0	0	0	0	0	0	14	0	0	0	0	0	1
Streptococcus_minor	0	0	0	0	4	5	0	0	1	3	0	2	0
Acetobacter_cibinongensis	0	0	0	0	0	0	0	0	0	0	0	14	0
Bacillus_longiquaesitum	0	0	0	0	0	4	0	0	0	0	0	7	3
Pantoea_coffeiphila	0	0	0	0	0	2	0	0	0	4	0	0	8
Acinetobacter_calcoaceticus	0	1	0	2	0	0	5	0	1	1	3	0	0
Aminobacter_anthyllidis	0	0	0	0	0	0	0	1	1	0	10	0	1
Auricoccus_indicus	0	0	0	0	1	1	0	0	1	0	10	0	0
Deinococcus_caeni	0	0	0	0	0	0	2	4	0	0	5	1	1
Lysobacter_humi	0	0	0	0	2	0	6	0	0	0	5	0	0
Noviherbaspirillum_suwonense	0	0	0	0	0	1	12	0	0	0	0	0	0
Pedobacter_cryoconitis	0	0	0	0	0	0	7	0	0	0	6	0	0
Acetobacter_musti	0	2	0	0	2	7	0	0	0	1	0	0	0
Bosea_massiliensis	0	0	0	0	2	0	5	0	0	0	1	4	0
Deinococcus_wulumuqiensis	0	0	0	0	0	2	0	1	2	1	0	6	0
Kocuria_salsicia	0	0	0	0	1	0	1	0	0	0	7	3	0
Lactobacillus_parakefiri	0	0	0	0	4	0	6	0	0	0	0	1	1
Variovorax_boronicumulans	1	0	1	1	0	0	0	0	0	0	0	0	9
Acinetobacter_radioresistens	0	0	0	0	1	4	0	1	0	0	3	0	2
Corynebacterium_lipophiloflavum	0	0	0	3	0	0	5	0	0	0	1	2	0
Haemophilus_haemolyticus	0	0	0	0	1	0	10	0	0	0	0	0	0
Lactobacillus_reuteri	0	0	0	0	0	2	0	0	2	0	0	7	0
Pseudomonas_oryzihabitans	0	0	0	0	1	0	0	0	0	0	9	1	0
Caedibacter_caryophilus	0	0	0	0	0	0	10	0	0	0	0	0	0
Corynebacterium_tuberculostearicum	0	0	0	0	0	0	0	0	0	0	0	0	10
Microbacterium_aurum	0	0	0	1	1	2	1	0	0	0	1	0	4
Pseudoxanthomonas_japonensis	0	0	0	1	0	0	5	0	1	0	0	0	3
Rubellimicrobium_roseum	0	0	0	0	0	0	3	0	0	0	7	0	0
Serratia_symbiotica	0	0	0	0	0	2	1	0	0	5	0	2	0
Thermomonas_carbonis	0	0	0	3	1	0	1	0	0	0	3	1	1
Aeromonas_hydrophila	0	1	0	0	3	0	1	0	0	0	0	0	4
Bacillus_subtilis	0	0	0	0	0	0	2	0	0	0	0	4	3
Macrococcus_goetzii	8	0	0	0	0	0	0	0	0	0	0	0	1
Malikia_spinosa	0	0	0	2	1	4	0	0	0	0	0	0	2
Propionibacterium_avidum	0	2	0	0	6	0	0	0	0	0	0	1	0
Pseudoxanthomonas_spadix	0	0	0	0	0	0	0	0	0	0	0	0	9
Sphingopyxis_alaskensis	0	0	0	2	1	0	2	0	0	0	4	0	0
Stenotrophomonas_bentonitica	0	0	0	0	0	0	9	0	0	0	0	0	0
Acinetobacter_baumannii	0	0	0	0	3	0	3	0	0	1	1	0	0
Burkholderia_lata	0	0	2	0	0	1	5	0	0	0	0	0	0
Capnocytophaga_granulosa	0	0	0	0	0	0	6	0	0	0	2	0	0
Deinococcus_murrayi	0	0	0	0	0	0	0	0	0	0	7	0	1
Duganella_ginsengisoli	0	0	0	0	0	8	0	0	0	0	0	0	0
Flavobacterium_piscis	0	0	0	0	1	0	2	0	0	0	5	0	0
Kocuria_palustris	0	0	0	0	0	0	0	3	0	0	2	0	3
Meiothermus_silvanus	0	0	0	0	0	0	3	0	0	0	0	5	0
Methylobacterium_mesophilicum	0	0	0	0	0	0	0	6	0	0	0	0	2
Methylorubrum_extorquens	0	0	0	0	0	0	0	8	0	0	0	0	0
Moraxella_ovis	0	0	0	0	0	1	0	0	1	0	0	0	6
Nocardioides_solisilvae	0	0	0	0	0	0	3	0	0	0	0	0	5
Pelomonas_saccharophila	0	0	0	0	1	3	1	1	0	1	1	0	0
Rhodococcus_qingshengii	0	0	0	0	1	0	5	1	0	0	1	0	0
Acinetobacter_schindleri	0	0	0	0	0	2	0	2	1	0	0	0	2
Alloprevotella_rava	0	0	0	0	0	0	5	0	0	1	0	1	0
Bacillus_beringensis	0	0	0	0	0	0	5	0	0	0	2	0	0
Brachybacterium_paraconglomeratum	1	0	0	3	1	0	1	0	0	0	0	1	0
Caballeronia_sordidicola	0	0	0	0	0	0	0	0	0	0	0	0	7
Delftia_acidovorans	0	0	0	0	0	0	1	1	0	1	2	1	1
Haemophilus_parainfluenzae	0	0	0	0	0	1	6	0	0	0	0	0	0
Lactococcus_raffinolactis	0	0	0	0	1	0	0	2	0	0	4	0	0
Mucilaginibacter_rubeus	0	0	0	0	0	0	0	0	0	0	0	0	7
Propionibacterium_granulosum	0	0	0	0	0	3	2	0	0	0	0	0	2
Rhizobium_rosettiformans	0	0	0	0	4	0	0	0	0	0	1	0	2
Sphingobacterium_mizutaii	0	0	0	0	0	0	0	0	0	0	7	0	0
Veillonella_parvula	0	0	0	0	1	0	1	0	0	0	0	5	0
Virgibacillus_senegalensis	0	0	0	0	0	0	1	0	3	0	0	3	0
Acinetobacter_guillouiae	0	0	0	0	3	0	0	0	0	2	1	0	0
Actinomyces_odontolyticus	0	0	0	0	0	0	5	0	0	0	0	1	0
Aquabacterium_parvum	0	0	0	0	0	1	0	0	0	0	4	0	1
Clostridium_chromiireducens	0	0	0	6	0	0	0	0	0	0	0	0	0
Enterococcus_mundtii	6	0	0	0	0	0	0	0	0	0	0	0	0
Membranicola_marinus	0	0	0	0	0	0	0	0	0	0	0	0	6
Methylobacterium_organophilum	0	0	0	0	0	0	4	0	0	0	2	0	0
Microbispora_rosea	0	0	0	0	0	0	0	1	1	0	0	0	4
Novosphingobium_resinovorum	0	0	0	0	0	0	0	0	0	0	0	0	6
Ornithinimicrobium_flavum	0	0	0	0	0	0	3	0	0	0	3	0	0
Proteiniclasticum_ruminis	0	0	0	0	0	0	6	0	0	0	0	0	0
Streptococcus_gordonii	0	0	0	0	0	0	0	0	0	0	0	6	0
Streptococcus_pluranimalium	0	0	0	0	0	0	0	0	0	0	0	0	6
Streptococcus_salivarius	0	0	1	0	1	2	0	1	1	0	0	0	0
Acetobacter_estunensis	0	0	0	0	1	1	0	0	1	1	0	0	1
Acidovorax_facilis	0	0	0	0	0	0	3	0	0	0	2	0	0
Alloprevotella_tannerae	0	0	0	0	0	0	5	0	0	0	0	0	0
Aquincola_tertiaricarbonis	0	0	0	1	2	0	0	0	0	0	1	0	1
Brevundimonas_aveniformis	0	0	0	0	2	0	1	0	0	0	1	1	0
Brevundimonas_kwangchunensis	0	0	0	0	0	0	2	0	0	0	2	0	1
Carnobacterium_maltaromaticum	4	0	0	0	0	1	0	0	0	0	0	0	0
Chryseobacterium_bovis	0	0	0	0	0	0	0	1	3	0	0	0	1
Enterococcus_avium	1	0	0	0	2	0	0	0	0	1	1	0	0
Fenollaria_massiliensis	0	0	0	0	0	0	0	0	0	0	5	0	0
Fusobacterium_varium	0	0	0	0	0	5	0	0	0	0	0	0	0
Gemmobacter_intermedius	0	0	0	0	0	0	0	0	0	0	0	0	5
Gracilibacillus_thailandensis	0	0	0	0	0	0	3	2	0	0	0	0	0
Lentibacillus_sediminis	0	0	0	0	0	0	2	1	2	0	0	0	0
Leptotrichia_wadei	0	0	0	0	0	1	0	0	0	0	0	4	0
Mobilicoccus_pelagius	0	0	0	0	0	0	0	0	0	0	0	0	5
Nocardioides_ganghwensis	0	0	0	2	0	0	1	0	0	0	2	0	0
Novosphingobium_aromaticivorans	0	0	0	0	0	0	5	0	0	0	0	0	0
Paracoccus_kocurii	0	0	0	0	0	0	5	0	0	0	0	0	0
Paracoccus_marinus	0	0	0	0	0	0	5	0	0	0	0	0	0
Porphyromonas_pasteri	0	0	0	0	0	0	3	0	0	0	0	0	2
Pseudomonas_knackmussii	0	0	0	0	0	4	0	1	0	0	0	0	0
Rubellimicrobium_mesophilum	0	0	0	0	0	0	5	0	0	0	0	0	0
Sphingobacterium_alimentarium	0	0	0	0	4	0	0	0	0	0	0	0	1
Sphingomonas_olei	0	0	0	0	2	0	1	0	0	0	2	0	0
Streptococcus_cristatus	0	0	0	0	0	0	4	0	0	0	1	0	0
Altererythrobacter_troitsensis	0	0	0	4	0	0	0	0	0	0	0	0	0
Atopostipes_suicloacalis	1	0	0	2	0	0	0	1	0	0	0	0	0
Bacillus_psychrotolerans	0	0	0	0	2	0	0	0	0	0	2	0	0
Brevibacterium_sanguinis	0	0	0	0	0	0	0	0	0	0	0	2	2
Caulobacter_rhizosphaerae	0	0	0	0	0	0	1	0	0	0	2	1	0
Comamonas_sediminis	0	0	0	0	0	0	1	0	1	2	0	0	0
Comamonas_testosteroni	0	0	0	0	2	2	0	0	0	0	0	0	0
Craurococcus_roseus	0	0	0	0	0	0	4	0	0	0	0	0	0
Desemzia_incerta	0	0	0	0	0	0	3	0	0	0	1	0	0
Empedobacter_brevis	0	0	0	0	0	0	0	0	0	4	0	0	0
Enterococcus_italicus	0	0	0	0	0	2	1	0	1	0	0	0	0
Eubacterium_coprostanoligenes	0	0	0	0	0	0	0	0	0	0	4	0	0
Flavobacterium_degerlachei	0	0	0	0	0	0	4	0	0	0	0	0	0
Fusobacterium_nucleatum	0	0	0	0	0	1	0	0	0	0	0	3	0
Gilliamella_apicola	0	0	0	0	0	0	0	0	0	0	0	0	4
Hydrogenophaga_flava	1	0	0	1	1	0	0	0	0	1	0	0	0
Janibacter_limosus	0	0	1	0	0	0	2	0	0	0	1	0	0
Lactobacillus_frumenti	0	0	0	0	1	1	0	0	1	0	1	0	0
Leuconostoc_lactis	0	0	0	0	0	1	0	3	0	0	0	0	0
Nicoletella_semolina	0	1	0	0	1	2	0	0	0	0	0	0	0
Novosphingobium_fluoreni	0	0	0	0	0	0	4	0	0	0	0	0	0
Paenibacillus_wynnii	0	0	0	0	0	0	4	0	0	0	0	0	0
Pedobacter_nyackensis	0	0	0	0	1	0	0	0	0	0	3	0	0
Phenylobacterium_haematophilum	0	0	0	0	0	0	4	0	0	0	0	0	0
Pinus_koraiensis	0	0	0	0	0	0	0	0	0	0	4	0	0
Prevotella_melaninogenica	0	0	0	0	0	0	2	0	0	0	0	2	0
Rhizobium_galegae	0	0	0	0	0	0	2	2	0	0	0	0	0
Roseomonas_mucosa	0	0	0	0	0	0	2	2	0	0	0	0	0
Rubrobacter_xylanophilus	0	0	0	0	0	0	0	0	0	0	3	1	0
Segetibacter_aerophilus	0	0	0	0	4	0	0	0	0	0	0	0	0
Sphingobacterium_daejeonense	0	0	0	0	0	0	3	0	0	0	1	0	0
Streptococcus_anginosus	0	0	0	0	0	0	0	0	0	0	0	4	0
Truepera_radiovictrix	0	0	0	0	0	2	2	0	0	0	0	0	0
Acetobacter_cerevisiae	0	0	0	0	0	0	0	0	0	2	0	0	1
Acidibacter_ferrireducens	0	0	0	0	0	1	0	0	2	0	0	0	0
Aciditerrimonas_ferrireducens	0	0	0	0	0	3	0	0	0	0	0	0	0
Arenimonas_metalli	0	0	0	0	0	0	0	0	0	0	0	0	3
Bacillus_flexus	0	0	0	0	0	0	3	0	0	0	0	0	0
Brachymonas_chironomi	0	0	0	0	0	0	0	0	0	0	3	0	0
Brevundimonas_variabilis	0	0	0	0	0	0	0	0	0	0	3	0	0
Chryseobacterium_nakagawai	0	0	0	0	0	0	0	0	0	3	0	0	0
Citrobacter_freundii	0	0	0	0	0	0	0	0	0	2	0	0	1
Clostridium_lactatifermentans	0	0	0	3	0	0	0	0	0	0	0	0	0
Devosia_psychrophila	0	1	0	0	1	0	1	0	0	0	0	0	0
Edaphobacter_modestum	0	0	0	0	0	0	0	0	0	0	0	0	3
Exiguobacterium_acetylicum	0	0	0	0	0	3	0	0	0	0	0	0	0
Gordonia_terrae	0	0	0	0	0	0	1	2	0	0	0	0	0
Lactobacillus_equi	0	0	0	0	0	1	0	0	0	0	0	2	0
Lactobacillus_mucosae	0	0	0	0	0	0	0	0	2	0	0	1	0
Lactococcus_taiwanensis	0	1	0	0	0	0	1	0	0	1	0	0	0
Lawsonella_clevelandensis	0	0	0	0	0	0	2	0	0	0	1	0	0
Lysobacter_capsici	0	0	0	0	0	0	0	0	0	0	3	0	0
Mongoliitalea_lutea	0	0	0	0	0	0	0	0	0	0	3	0	0
Mucilaginibacter_gossypiicola	0	0	0	0	0	0	0	0	0	0	0	0	3
Neisseria_elongata	0	0	0	0	1	0	0	0	0	0	0	1	1
Paenibacillus_koleovorans	0	0	0	0	0	3	0	0	0	0	0	0	0
Paracoccus_acridae	0	0	0	0	1	0	0	0	0	0	2	0	0
Porphyromonas_catoniae	0	0	0	0	0	1	0	0	1	0	0	0	1
Pseudarthrobacter_chlorophenolicus	0	0	0	0	0	2	0	0	0	0	1	0	0
Pseudoclavibacter_helvolus	0	0	0	0	2	0	0	0	0	0	0	1	0
Pseudorhodoplanes_sinuspersici	0	0	0	0	0	0	0	0	3	0	0	0	0
Rhodococcus_sovatensis	0	0	0	0	0	0	0	0	0	0	0	0	3
Ruminococcus_callidus	3	0	0	0	0	0	0	0	0	0	0	0	0
Sanguibacter_keddieii	0	0	0	0	0	0	3	0	0	0	0	0	0
Serratia_liquefaciens	1	0	0	0	0	0	0	0	0	2	0	0	0
Simplicispira_psychrophila	0	0	0	0	0	0	3	0	0	0	0	0	0
Sphingomonas_hunanensis	0	0	0	2	0	0	0	0	0	0	0	1	0
Sphingomonas_wittichii	0	0	0	0	0	0	0	0	0	0	0	0	3
Staphylococcus_muscae	0	0	0	0	0	0	0	0	1	0	0	2	0
Streptococcus_lactarius	0	0	0	0	0	0	1	0	0	1	0	1	0
Vicinamibacter_silvestris	0	0	0	0	0	0	0	0	0	0	1	2	0
Abiotrophia_defectiva	0	0	0	0	0	0	0	0	0	0	0	2	0
Acinetobacter_septicus	0	0	0	0	0	0	0	0	0	0	0	0	2
Alkanindiges_illinoisensis	0	0	0	1	0	1	0	0	0	0	0	0	0
Alysiella_crassa	0	0	0	0	0	0	0	0	0	0	0	0	2
Anaerococcus_prevotii	0	0	0	0	0	0	0	0	0	0	1	0	1
Bacillus_isronensis	0	0	0	0	0	0	0	0	2	0	0	0	0
Bacteroides_uniformis	0	0	0	0	0	2	0	0	0	0	0	0	0
Capnocytophaga_sputigena	0	0	0	0	0	0	2	0	0	0	0	0	0
Carnobacterium_viridans	0	0	0	0	1	0	0	0	0	1	0	0	0
Chryseolinea_serpens	0	0	0	0	0	0	2	0	0	0	0	0	0
Citrobacter_murliniae	0	0	0	0	0	0	0	0	0	2	0	0	0
Cnuella_takakiae	0	0	0	0	0	0	1	0	0	0	1	0	0
Corynebacterium_glucuronolyticum	0	0	0	0	0	0	0	0	0	0	2	0	0
Corynebacterium_stationis	0	0	0	1	0	0	0	0	0	0	1	0	0
Corynebacterium_suicordis	0	0	0	2	0	0	0	0	0	0	0	0	0
Corynebacterium_variabile	0	0	0	0	0	1	0	0	0	1	0	0	0
Deinococcus_budaensis	0	0	0	2	0	0	0	0	0	0	0	0	0
Deinococcus_ficus	0	0	0	0	0	0	1	0	0	0	0	0	1
Enterobacter_ludwigii	0	0	0	2	0	0	0	0	0	0	0	0	0
Falsirhodobacter_halotolerans	0	0	0	0	0	0	0	0	0	0	0	0	2
Flaviaesturariibacter_luteus	0	0	0	0	0	0	2	0	0	0	0	0	0
Flavisolibacter_ginsengiterrae	0	0	0	0	0	0	0	0	0	0	0	0	2
Flavobacterium_glaciei	0	0	0	0	0	1	0	0	0	0	1	0	0
Geodermatophilus_obscurus	0	0	0	0	2	0	0	0	0	0	0	0	0
Hahella_antarctica	2	0	0	0	0	0	0	0	0	0	0	0	0
Janibacter_anophelis	0	0	0	0	0	0	0	0	0	0	0	2	0
Janibacter_melonis	0	0	0	0	0	0	1	1	0	0	0	0	0
Kluyvera_intermedia	0	0	0	0	0	1	0	0	1	0	0	0	0
Lactobacillus_hamsteri	0	1	0	0	0	0	0	1	0	0	0	0	0
Lautropia_mirabilis	2	0	0	0	0	0	0	0	0	0	0	0	0
Luteibacter_rhizovicinus	0	0	0	0	0	0	0	0	0	0	0	0	2
Luteimonas_composti	2	0	0	0	0	0	0	0	0	0	0	0	0
Luteitalea_pratensis	0	0	0	0	0	0	2	0	0	0	0	0	0
Luteolibacter_gellanilyticus	0	0	0	0	0	0	0	0	0	0	2	0	0
Lysobacter_arseniciresistens	2	0	0	0	0	0	0	0	0	0	0	0	0
Massilia_alkalitolerans	0	0	0	0	0	2	0	0	0	0	0	0	0
Moraxella_lacunata	0	0	1	0	0	1	0	0	0	0	0	0	0
Nordella_oligomobilis	0	0	0	0	0	0	0	0	2	0	0	0	0
Oceanobacillus_picturae	0	0	0	0	0	0	0	0	1	0	0	1	0
Ochrobactrum_haematophilum	0	0	0	0	0	0	0	0	2	0	0	0	0
Ochrobactrum_intermedium	0	0	0	0	0	0	0	2	0	0	0	0	0
Parviterribacter_kavangonensis	0	0	0	0	0	0	0	2	0	0	0	0	0
Peptoniphilus_coxii	0	0	0	0	0	0	0	0	0	0	2	0	0
Peptoniphilus_lacydonensis	0	0	0	0	0	1	0	1	0	0	0	0	0
Planobacterium_taklimakanense	0	0	0	0	0	0	2	0	0	0	0	0	0
Rhizobium_alvei	0	0	0	0	0	0	0	0	0	0	2	0	0
Roseomonas_vinacea	0	0	0	0	0	0	2	0	0	0	0	0	0
Selenomonas_infelix	0	0	0	0	0	0	0	0	0	0	0	2	0
Skermanella_aerolata	0	0	0	0	0	0	0	0	0	0	2	0	0
Sphingobacterium_hotanense	0	0	0	0	1	0	1	0	0	0	0	0	0
Sphingobacterium_multivorum	0	0	0	0	0	0	0	0	0	0	2	0	0
Sphingomonas_parapaucimobilis	0	0	0	0	0	1	0	0	0	1	0	0	0
Tepidisphaera_mucosa	0	0	0	0	2	0	0	0	0	0	0	0	0
Weissella_hellenica	0	0	0	0	1	0	0	0	0	0	0	1	0
Zhihengliuella_aestuarii	0	0	1	0	0	0	1	0	0	0	0	0	0
Acidovorax_wohlfahrtii	0	0	0	0	0	0	0	0	0	0	1	0	0
Acinetobacter_marinus	0	0	0	0	1	0	0	0	0	0	0	0	0
Acinetobacter_rhizosphaerae	0	0	0	1	0	0	0	0	0	0	0	0	0
Actinomyces_georgiae	0	0	0	0	0	0	0	1	0	0	0	0	0
Actinomyces_oris	0	0	0	0	0	0	0	0	0	0	1	0	0
Aeromicrobium_flavum	0	0	0	0	0	0	0	0	0	0	0	0	1
Agrococcus_citreus	0	0	0	0	1	0	0	0	0	0	0	0	0
Altererythrobacter_palmitatis	0	0	0	0	0	0	0	0	1	0	0	0	0
Altererythrobacter_rigui	0	0	0	0	0	0	1	0	0	0	0	0	0
Altererythrobacter_soli	1	0	0	0	0	0	0	0	0	0	0	0	0
Aquihabitans_daechungensis	0	0	0	0	0	0	1	0	0	0	0	0	0
Arboricoccus_pini	1	0	0	0	0	0	0	0	0	0	0	0	0
Arthrobacter_agilis	0	0	0	0	0	1	0	0	0	0	0	0	0
Arthrobacter_globiformis	0	0	0	0	1	0	0	0	0	0	0	0	0
Arthrobacter_mysorens	1	0	0	0	0	0	0	0	0	0	0	0	0
Arthrobacter_psychrolactophilus	0	0	0	0	0	0	0	0	0	0	0	0	1
Asticcacaulis_excentricus	0	0	0	0	1	0	0	0	0	0	0	0	0
Azospirillum_agricola	0	0	0	0	0	0	0	1	0	0	0	0	0
Bacillus_humi	0	0	0	0	0	0	0	0	0	0	0	1	0
Bacillus_macyae	0	0	0	1	0	0	0	0	0	0	0	0	0
Bergeyella_zoohelcum	0	0	0	0	0	0	0	0	0	0	0	0	1
Brachybacterium_muris	0	0	0	0	0	0	0	0	0	0	0	1	0
Brevibacterium_pityocampae	0	0	0	1	0	0	0	0	0	0	0	0	0
Brevundimonas_vesicularis	0	0	0	0	0	0	0	1	0	0	0	0	0
Burkholderia_contaminans	0	0	0	0	0	0	0	1	0	0	0	0	0
Cecembia_lonarensis	0	0	0	0	0	0	0	1	0	0	0	0	0
Cellvibrio_gandavensis	0	0	0	0	0	0	0	0	0	0	0	1	0
Cereibacter_changlensis	0	0	0	1	0	0	0	0	0	0	0	0	0
Chryseobacterium_aquaticum	0	0	0	0	0	0	0	0	0	0	1	0	0
Chryseobacterium_hominis	0	0	0	0	0	0	0	0	0	0	0	0	1
Chryseomicrobium_amylolyticum	0	0	0	0	0	1	0	0	0	0	0	0	0
Cloacibacterium_haliotis	0	0	0	0	0	0	1	0	0	0	0	0	0
Croceicoccus_pelagius	0	0	0	0	0	0	0	1	0	0	0	0	0
Deinococcus_antarcticus	0	0	0	0	0	0	0	0	0	1	0	0	0
Deinococcus_proteolyticus	0	0	0	0	0	0	0	0	0	0	0	1	0
Deinococcus_reticulitermitis	0	0	0	0	0	0	0	0	0	0	0	1	0
Dermacoccus_nishinomiyaensis	0	0	0	0	0	0	0	1	0	0	0	0	0
Dietzia_schimae	0	0	0	0	0	0	1	0	0	0	0	0	0
Edaphobaculum_flavum	0	0	0	0	0	0	1	0	0	0	0	0	0
Enterobacter_amnigenus	0	0	0	0	0	0	0	0	0	0	0	0	1
Eubacterium_moniliforme	0	0	0	0	0	1	0	0	0	0	0	0	0
Eubacterium_rectale	0	0	0	0	1	0	0	0	0	0	0	0	0
Ewingella_americana	1	0	0	0	0	0	0	0	0	0	0	0	0
Facklamia_tabacinasalis	0	0	0	0	0	0	0	1	0	0	0	0	0
Fimbriiglobus_ruber	0	0	0	0	0	1	0	0	0	0	0	0	0
Flavobacterium_qiangtangense	0	0	0	0	1	0	0	0	0	0	0	0	0
Flavobacterium_suzhouense	0	0	0	0	1	0	0	0	0	0	0	0	0
Flavobacterium_ummariense	0	0	0	0	0	1	0	0	0	0	0	0	0
Fluviicola_hefeinensis	0	0	0	0	0	0	1	0	0	0	0	0	0
Fusobacterium_gastrosuis	0	0	0	0	0	1	0	0	0	0	0	0	0
Gaiella_occulta	0	0	0	0	0	0	0	0	0	0	0	1	0
Geobacillus_stearothermophilus	0	0	0	0	0	0	0	0	0	0	1	0	0
Haemophilus_paraphrohaemolyticus	0	0	0	0	0	0	0	0	0	0	1	0	0
Halomonas_desiderata	0	0	0	0	0	0	0	0	0	0	0	0	1
Hyphomicrobium_vulgare	0	0	0	0	1	0	0	0	0	0	0	0	0
Jeotgalicoccus_huakuii	0	0	0	0	1	0	0	0	0	0	0	0	0
Jeotgalicoccus_psychrophilus	0	0	0	0	0	0	0	0	0	0	1	0	0
Kineosporia_rhamnosa	0	0	0	0	0	0	0	0	0	0	0	1	0
Klebsiella_quasipneumoniae	0	0	0	0	0	0	0	1	0	0	0	0	0
Knoellia_locipacati	0	0	0	0	0	0	0	0	0	0	0	1	0
Lachnoanaerobaculum_umeaense	0	0	0	0	0	1	0	0	0	0	0	0	0
Lactobacillus_buchneri	0	0	0	0	0	0	0	0	0	0	0	1	0
Lactobacillus_coleohominis	0	0	0	0	0	1	0	0	0	0	0	0	0
Lactobacillus_diolivorans	0	0	0	0	0	0	0	1	0	0	0	0	0
Lactobacillus_iners	0	0	0	0	0	0	0	0	0	0	0	1	0
Lactobacillus_paraplantarum	0	0	1	0	0	0	0	0	0	0	0	0	0
Lactobacillus_pentosus	0	0	0	0	0	0	0	0	0	0	1	0	0
Leptotrichia_shahii	0	0	0	0	0	0	0	0	0	0	0	1	0
Leuconostoc_pseudomesenteroides	0	0	0	0	0	0	0	0	0	0	0	1	0
Luteococcus_peritonei	0	0	0	0	0	0	0	1	0	0	0	0	0
Lysobacter_dokdonensis	0	0	0	0	0	0	0	0	1	0	0	0	0
Lysobacter_spongiicola	0	0	0	0	0	0	0	0	0	0	1	0	0
Macellibacteroides_fermentans	0	0	0	0	0	0	1	0	0	0	0	0	0
Massilia_haematophila	0	0	0	0	0	0	1	0	0	0	0	0	0
Massilia_yuzhufengensis	0	0	0	0	0	1	0	0	0	0	0	0	0
Melittangium_lichenicola	0	0	0	0	0	0	1	0	0	0	0	0	0
Metaprevotella_massiliensis	0	0	0	0	1	0	0	0	0	0	0	0	0
Methylobacterium_aminovorans	0	0	0	0	0	0	0	0	1	0	0	0	0
Methylobacterium_dankookense	0	0	0	0	0	0	0	0	0	1	0	0	0
Methylobacterium_jeotgali	0	0	0	0	0	0	0	0	0	0	0	1	0
Microbacterium_proteolyticum	0	0	0	0	0	0	0	1	0	0	0	0	0
Micrococcus_endophyticus	0	0	0	0	0	0	0	0	0	1	0	0	0
Negativicoccus_massiliensis	0	0	0	0	0	1	0	0	0	0	0	0	0
Negativicoccus_succinicivorans	0	0	0	0	0	0	1	0	0	0	0	0	0
Neisseria_weaveri	1	0	0	0	0	0	0	0	0	0	0	0	0
Nitrolancea_hollandica	0	0	0	0	0	0	1	0	0	0	0	0	0
Nocardioides_marinus	0	0	0	0	0	0	1	0	0	0	0	0	0
Ottowia_beijingensis	0	0	0	0	1	0	0	0	0	0	0	0	0
Paludibaculum_fermentans	0	0	0	0	0	0	1	0	0	0	0	0	0
Paracoccus_laeviglucosivorans	0	0	0	1	0	0	0	0	0	0	0	0	0
Peptoniphilus_koenoeneniae	0	0	0	0	0	0	0	0	1	0	0	0	0
Planifilum_fimeticola	0	0	0	0	0	0	1	0	0	0	0	0	0
Polaromonas_naphthalenivorans	0	0	0	0	0	0	0	0	0	0	0	0	1
Polymorphobacter_fuscus	0	0	0	0	0	0	0	0	1	0	0	0	0
Prevotellamassilia_timonensis	0	0	0	0	0	0	0	0	0	0	0	0	1
Pseudomonas_protegens	0	0	0	0	0	0	0	0	0	0	0	0	1
Psychrobacter_sanguinis	1	0	0	0	0	0	0	0	0	0	0	0	0
Ramlibacter_ginsenosidimutans	0	0	0	0	0	0	0	0	0	0	0	1	0
Raoultella_planticola	0	0	0	1	0	0	0	0	0	0	0	0	0
Rehaibacterium_terrae	0	0	0	0	0	0	0	0	0	0	1	0	0
Reyranella_massiliensis	0	0	0	0	0	0	0	1	0	0	0	0	0
Rheinheimera_mesophila	0	0	0	0	0	0	0	0	0	0	0	0	1
Rhizobium_cellulosilyticum	0	0	0	0	0	0	0	0	0	0	0	0	1
Rhodococcus_coprophilus	0	0	0	0	0	0	0	0	0	0	0	1	0
Rhodococcus_corynebacterioides	0	0	0	0	1	0	0	0	0	0	0	0	0
Rhodomicrobium_vannielii	0	0	0	0	0	0	0	0	1	0	0	0	0
Rhodopseudomonas_boonkerdii	0	0	0	0	0	0	0	0	0	0	1	0	0
Romboutsia_timonensis	1	0	0	0	0	0	0	0	0	0	0	0	0
Roseomonas_aestuarii	0	0	0	0	0	0	0	0	1	0	0	0	0
Rothia_aeria	0	0	0	0	0	0	0	0	0	0	1	0	0
Simplicispira_soli	0	0	0	0	0	0	0	0	0	0	0	0	1
Snodgrassella_alvi	0	0	0	0	0	0	0	0	0	0	0	0	1
Solobacterium_moorei	0	0	0	0	0	0	0	0	0	0	0	0	1
Sphingobium_olei	0	0	0	0	1	0	0	0	0	0	0	0	0
Sphingomonas_koreensis	0	0	0	0	1	0	0	0	0	0	0	0	0
Sphingomonas_melonis	0	0	0	1	0	0	0	0	0	0	0	0	0
Sphingomonas_paucimobilis	0	0	0	0	0	1	0	0	0	0	0	0	0
Sphingomonas_sanxanigenens	0	0	0	0	0	0	0	0	0	0	0	0	1
Sporacetigenium_mesophilum	0	0	0	0	0	0	0	0	0	0	0	0	1
Sporolactobacillus_nakayamae	0	0	0	0	0	1	0	0	0	0	0	0	0
Staphylococcus_cohnii	1	0	0	0	0	0	0	0	0	0	0	0	0
Staphylococcus_hominis	0	0	0	0	1	0	0	0	0	0	0	0	0
Staphylococcus_simiae	1	0	0	0	0	0	0	0	0	0	0	0	0
Starkeya_novella	0	0	0	0	0	0	0	0	0	0	0	0	1
Stenotrophobacter_terrae	0	0	0	0	0	0	1	0	0	0	0	0	0
Streptococcus_devriesei	0	0	0	0	0	0	0	0	0	0	0	1	0
Streptococcus_dysgalactiae	1	0	0	0	0	0	0	0	0	0	0	0	0
Streptococcus_intermedius	0	0	0	0	0	0	0	0	0	0	0	1	0
Streptococcus_mitis	0	0	0	0	1	0	0	0	0	0	0	0	0
Streptococcus_parauberis	0	0	0	0	0	0	0	0	1	0	0	0	0
Streptococcus_pasteurianus	0	0	0	0	0	0	0	0	0	0	0	0	1
Succiniclasticum_ruminis	0	0	0	0	0	1	0	0	0	0	0	0	0
Tessaracoccus_flavescens	0	0	0	0	0	0	0	0	1	0	0	0	0
Thermus_thermophilus	0	0	0	0	0	0	0	0	0	0	0	0	1
Thiobaca_trueperi	0	0	0	0	0	0	0	0	1	0	0	0	0
Treponema_socranskii	0	0	0	0	0	0	0	0	0	0	1	0	0
Trichococcus_flocculiformis	1	0	0	0	0	0	0	0	0	0	0	0	0
Turicibacter_sanguinis	0	0	0	0	0	0	0	0	0	0	0	1	0
Undibacterium_seohonense	0	0	0	0	0	1	0	0	0	0	0	0	0
Vogesella_mureinivorans	0	0	0	0	0	1	0	0	0	0	0	0	0
Weissella_cibaria	0	0	0	0	0	0	1	0	0	0	0	0	0
Acetobacter_aceti	0	0	0	0	0	0	0	0	0	0	0	0	0
Acetobacter_fabarum	0	0	0	0	0	0	0	0	0	0	0	0	0
Acetobacter_ghanensis	0	0	0	0	0	0	0	0	0	0	0	0	0
Acetobacter_lovaniensis	0	0	0	0	0	0	0	0	0	0	0	0	0
Acetobacter_orientalis	0	0	0	0	0	0	0	0	0	0	0	0	0
Acetobacter_pomorum	0	0	0	0	0	0	0	0	0	0	0	0	0
Acetobacter_syzygii	0	0	0	0	0	0	0	0	0	0	0	0	0
Acinetobacter_pittii	0	0	0	0	0	0	0	0	0	0	0	0	0
Acinetobacter_ursingii	0	0	0	0	0	0	0	0	0	0	0	0	0
Aeromonas_caviae	0	0	0	0	0	0	0	0	0	0	0	0	0
Aeromonas_media	0	0	0	0	0	0	0	0	0	0	0	0	0
Aeromonas_salmonicida	0	0	0	0	0	0	0	0	0	0	0	0	0
Agrococcus_jenensis	0	0	0	0	0	0	0	0	0	0	0	0	0
Azospira_oryzae	0	0	0	0	0	0	0	0	0	0	0	0	0
Bacillus_odysseyi	0	0	0	0	0	0	0	0	0	0	0	0	0
Bacteriovorax_stolpii	0	0	0	0	0	0	0	0	0	0	0	0	0
Calothrix_desertica	0	0	0	0	0	0	0	0	0	0	0	0	0
Chryseobacterium_profundimaris	0	0	0	0	0	0	0	0	0	0	0	0	0
Clostridium_intestinale	0	0	0	0	0	0	0	0	0	0	0	0	0
Clostridium_propionicum	0	0	0	0	0	0	0	0	0	0	0	0	0
Corynebacterium_matruchotii	0	0	0	0	0	0	0	0	0	0	0	0	0
Curvibacter_gracilis	0	0	0	0	0	0	0	0	0	0	0	0	0
Enhydrobacter_aerosaccus	0	0	0	0	0	0	0	0	0	0	0	0	0
Ferribacterium_limneticum	0	0	0	0	0	0	0	0	0	0	0	0	0
Geminicoccus_roseus	0	0	0	0	0	0	0	0	0	0	0	0	0
Gluconacetobacter_rhaeticus	0	0	0	0	0	0	0	0	0	0	0	0	0
Gluconobacter_oxydans	0	0	0	0	0	0	0	0	0	0	0	0	0
Klebsiella_grimontii	0	0	0	0	0	0	0	0	0	0	0	0	0
Klebsiella_variicola	0	0	0	0	0	0	0	0	0	0	0	0	0
Kocuria_varians	0	0	0	0	0	0	0	0	0	0	0	0	0
Komagataeibacter_sucrofermentans	0	0	0	0	0	0	0	0	0	0	0	0	0
Komagataeibacter_swingsii	0	0	0	0	0	0	0	0	0	0	0	0	0
Lactobacillus_crustorum	0	0	0	0	0	0	0	0	0	0	0	0	0
Lactobacillus_gallinarum	0	0	0	0	0	0	0	0	0	0	0	0	0
Lactobacillus_gorillae	0	0	0	0	0	0	0	0	0	0	0	0	0
Lactobacillus_kitasatonis	0	0	0	0	0	0	0	0	0	0	0	0	0
Lactobacillus_kullabergensis	0	0	0	0	0	0	0	0	0	0	0	0	0
Lactobacillus_leichmannii	0	0	0	0	0	0	0	0	0	0	0	0	0
Lactobacillus_oris	0	0	0	0	0	0	0	0	0	0	0	0	0
Lactobacillus_panis	0	0	0	0	0	0	0	0	0	0	0	0	0
Lactobacillus_sanfranciscensis	0	0	0	0	0	0	0	0	0	0	0	0	0
Lysinibacillus_chungkukjangi	0	0	0	0	0	0	0	0	0	0	0	0	0
Methylophaga_nitratireducenticrescens	0	0	0	0	0	0	0	0	0	0	0	0	0
Neisseria_cinerea	0	0	0	0	0	0	0	0	0	0	0	0	0
Opitutus_terrae	0	0	0	0	0	0	0	0	0	0	0	0	0
Paeniglutamicibacter_antarcticus	0	0	0	0	0	0	0	0	0	0	0	0	0
Peptostreptococcus_anaerobius	0	0	0	0	0	0	0	0	0	0	0	0	0
Planomicrobium_glaciei	0	0	0	0	0	0	0	0	0	0	0	0	0
Prevotella_dentasini	0	0	0	0	0	0	0	0	0	0	0	0	0
Raoultella_ornithinolytica	0	0	0	0	0	0	0	0	0	0	0	0	0
Rhodoferax_saidenbachensis	0	0	0	0	0	0	0	0	0	0	0	0	0
Roseomonas_pecuniae	0	0	0	0	0	0	0	0	0	0	0	0	0
Roseovarius_antarcticus	0	0	0	0	0	0	0	0	0	0	0	0	0
Rothia_endophytica	0	0	0	0	0	0	0	0	0	0	0	0	0
Selenomonas_artemidis	0	0	0	0	0	0	0	0	0	0	0	0	0
Shigella_boydii	0	0	0	0	0	0	0	0	0	0	0	0	0
Sphingomonas_endophytica	0	0	0	0	0	0	0	0	0	0	0	0	0
Streptococcus_orisasini	0	0	0	0	0	0	0	0	0	0	0	0	0
Streptococcus_ovis	0	0	0	0	0	0	0	0	0	0	0	0	0
Weissella_viridescens	0	0	0	0	0	0	0	0	0	0	0	0	0
